# Supplementary material for: Total synthesis of a 20-deoxybryostatin
Source: Royal Society of Chemistry journal article supplement (doi:10.1039/c1cc12332g), 2011-01-01

This report was created by ACD/NMR Processor Academic Edition. For more information go to [www.acdlabs.com/nmrproc/](http://www.acdlabs.com/nmrproc/)

Compound 9 mPROTON CDCl3 {e:\bruk400data\2008\Nov} ejt 52

2008-11-12-ejt-52.010.001.1r.esp

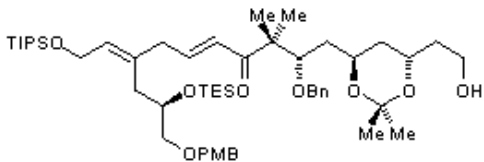

**9**  
(400 MHz, CDCl<sub>3</sub>)

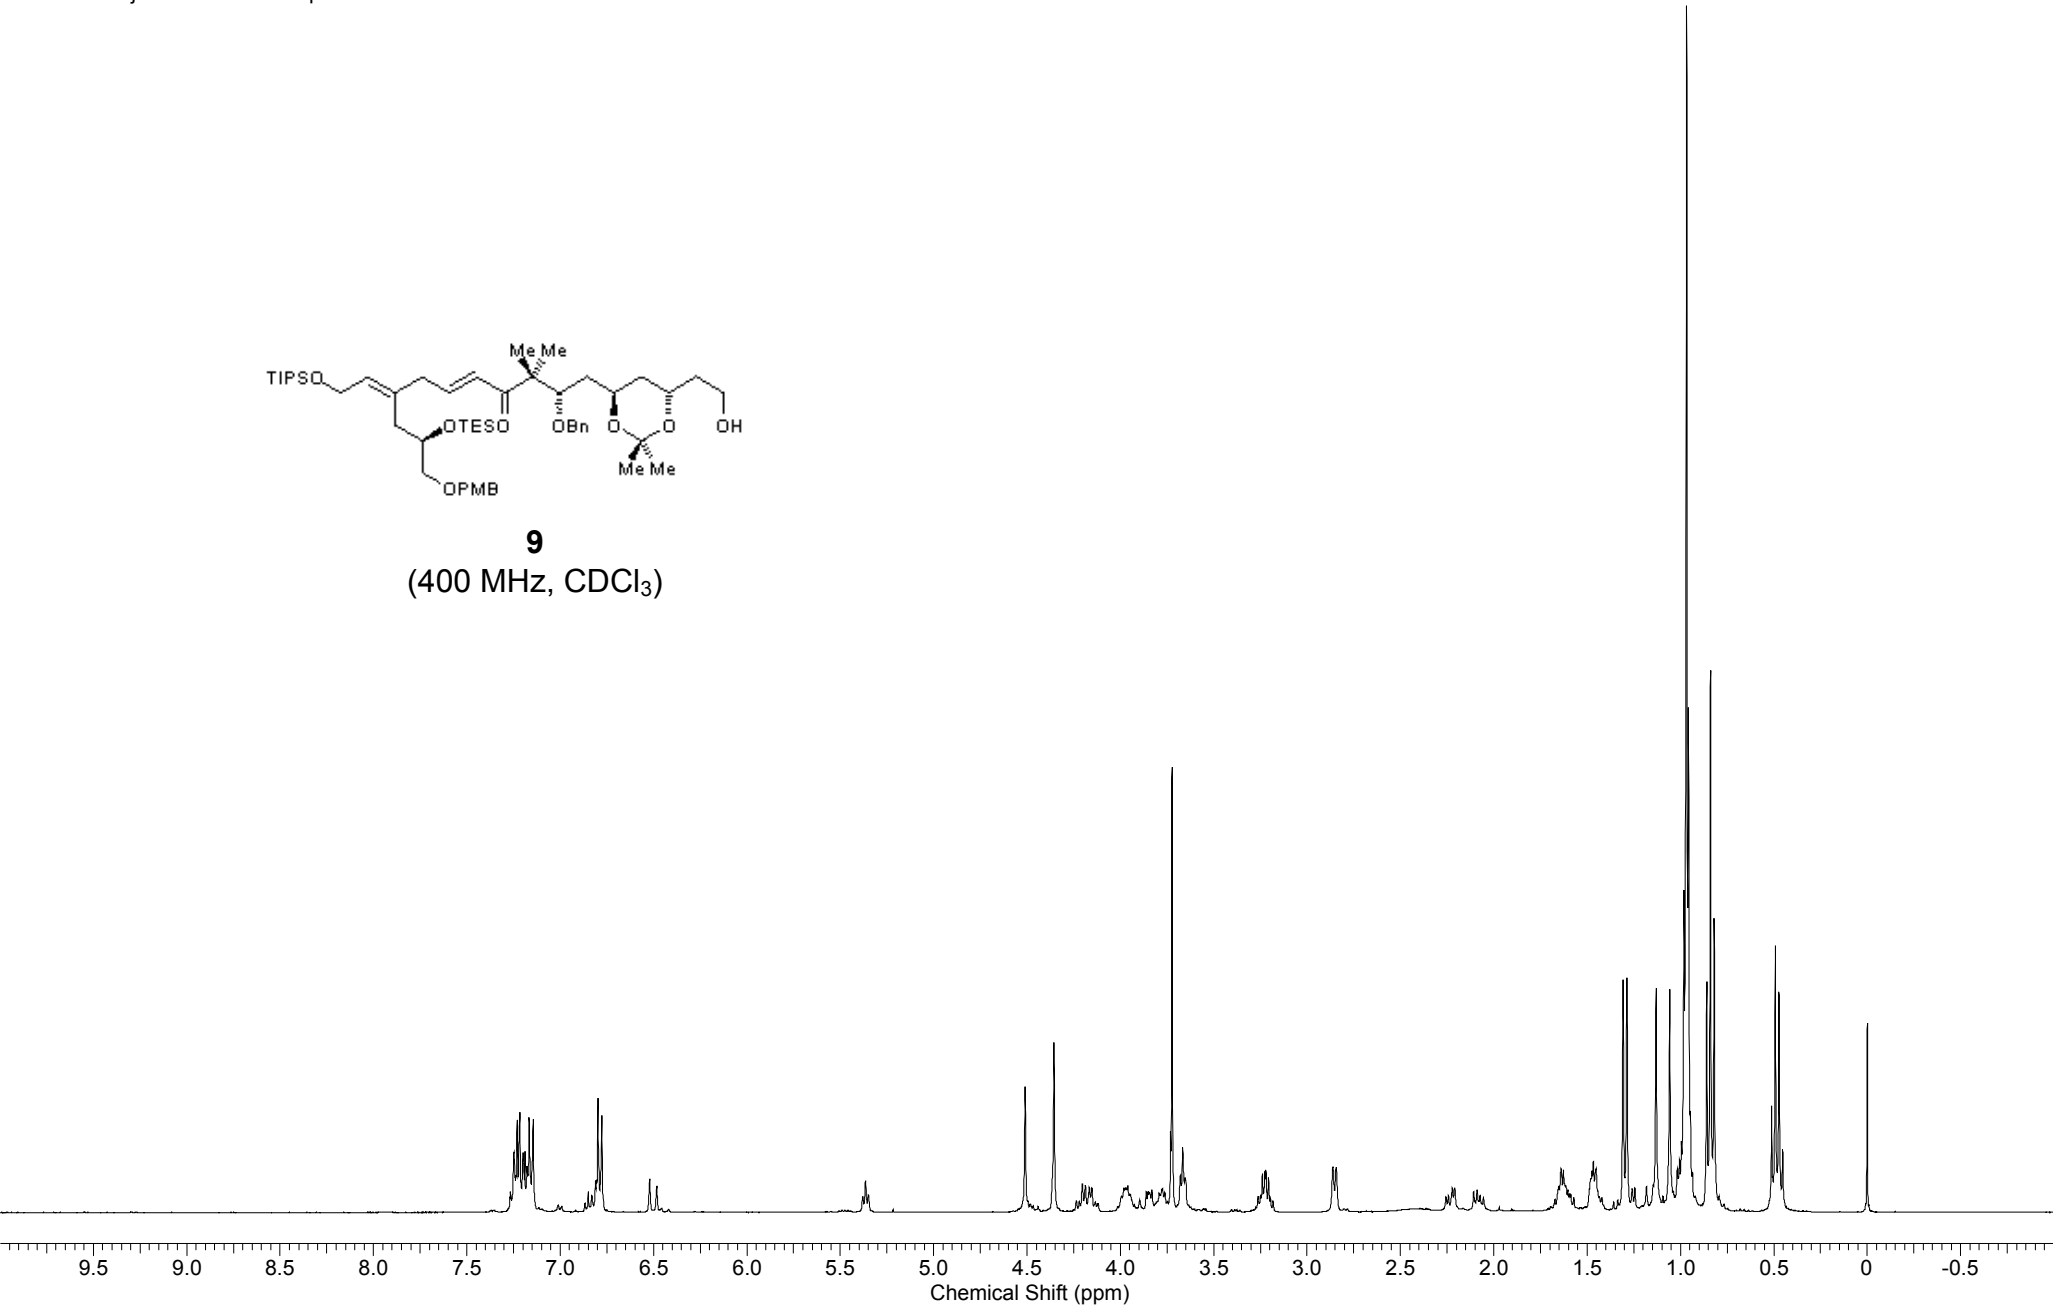

This report was created by ACD/NMR Processor Academic Edition. For more information go to [www.acdlabs.com/nmrproc/](http://www.acdlabs.com/nmrproc/)

Compound 11 mPROTONnight CDCl<sub>3</sub> {e:\bruk400data\2008\Nov} ejt 2

2008-11-13-ejt-2.010.001.1r.esp

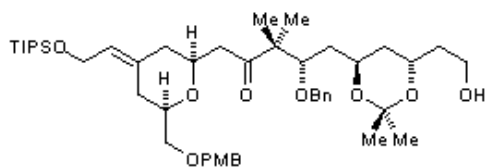

**11**  
(400 MHz, CDCl<sub>3</sub>)

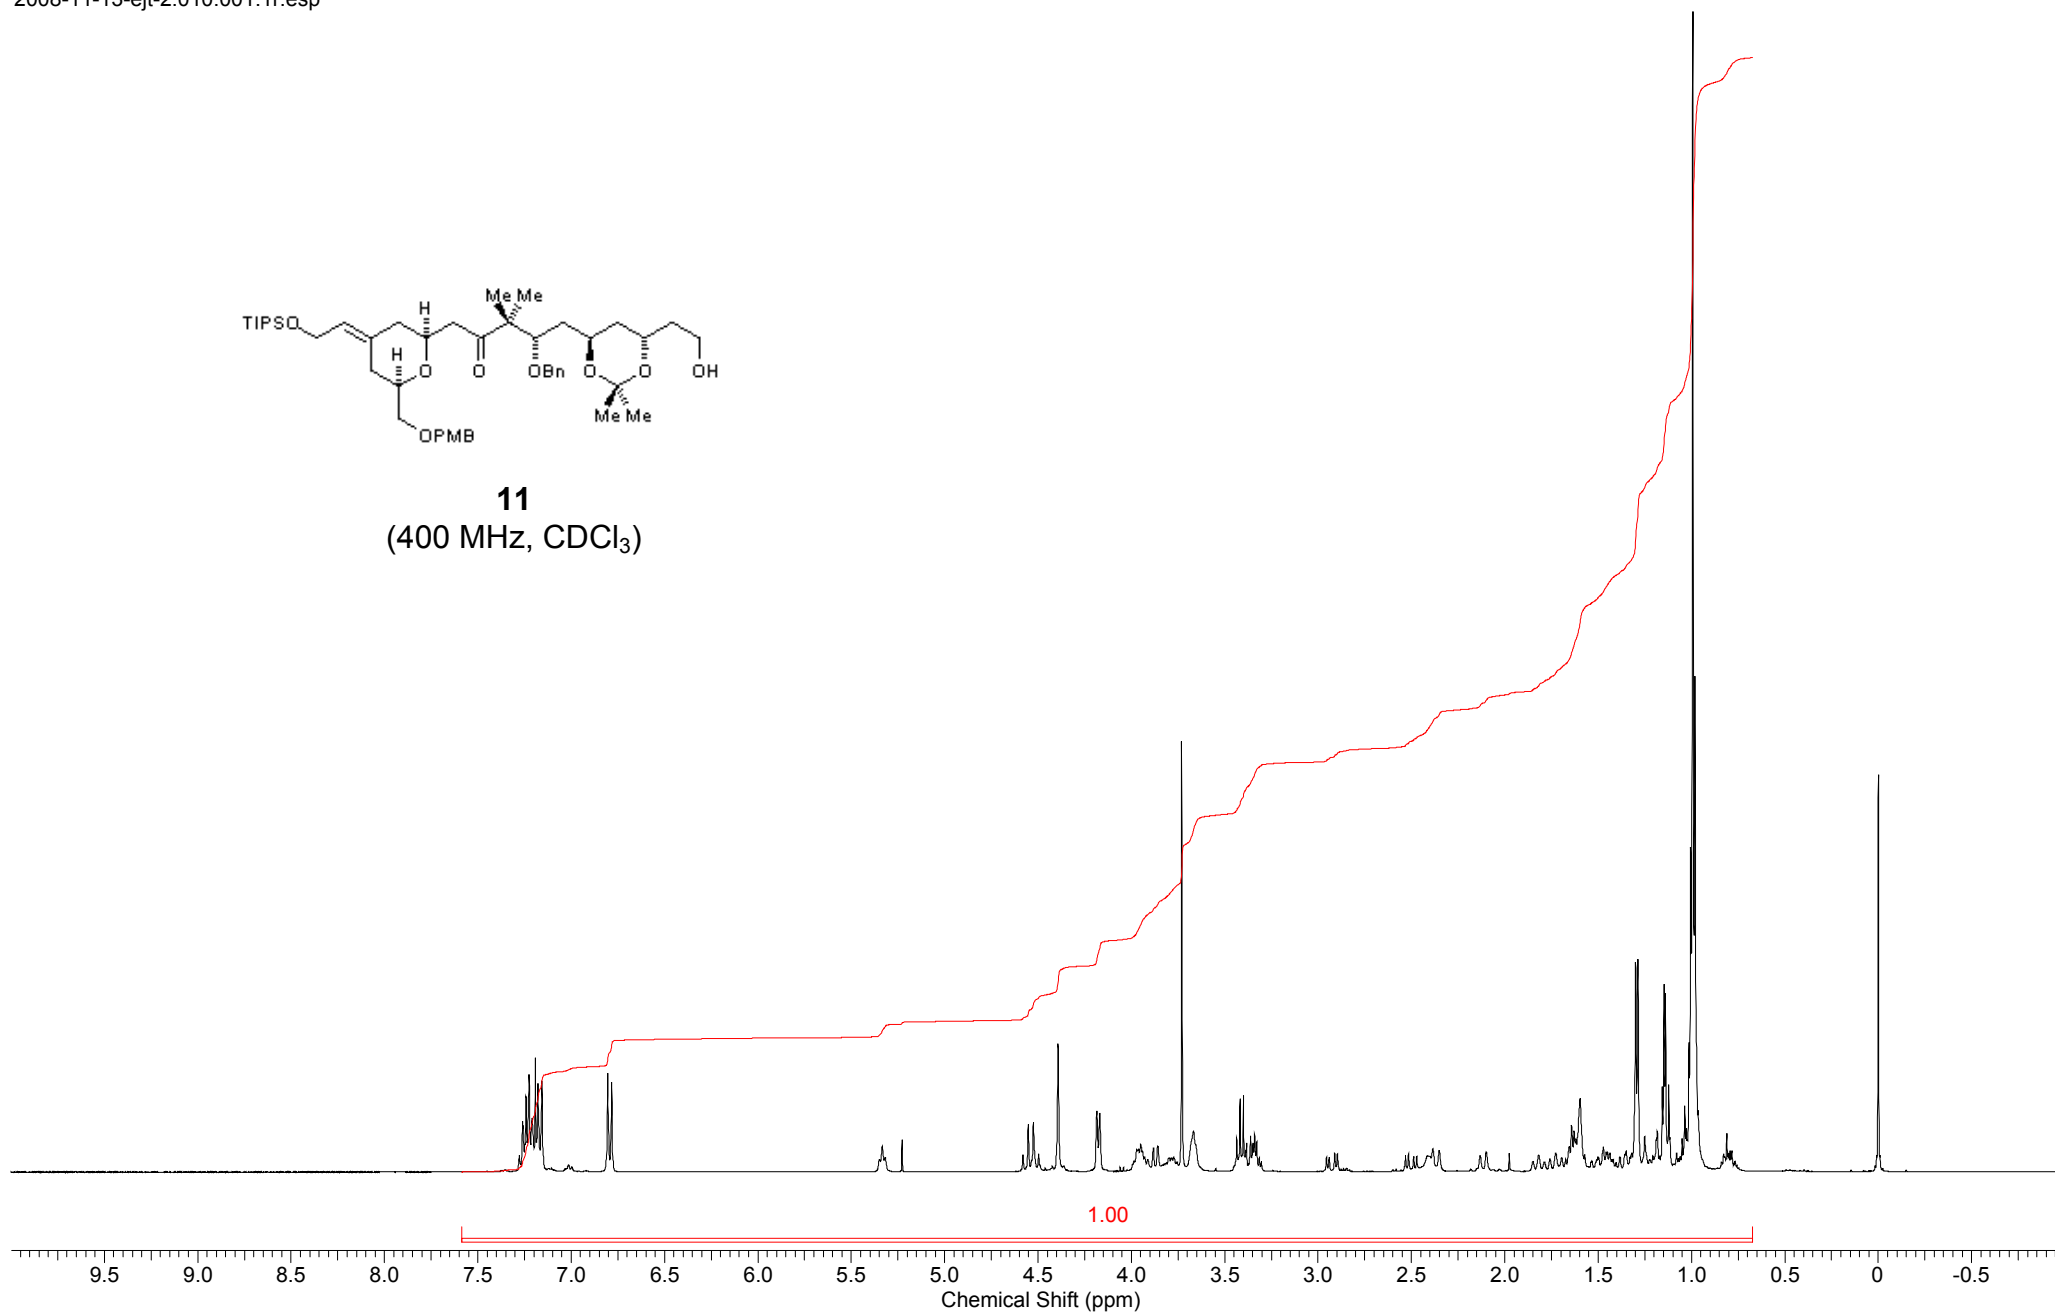

This report was created by ACD/NMR Processor Academic Edition. For more information go to [www.acdlabs.com/nmrproc/](http://www.acdlabs.com/nmrproc/)

Compound 11 mCARBONnight CDCl<sub>3</sub> {e:\bruk400data\2008\Nov} ejt 2

2008-11-13-ejt-2.011.001.1r.esp

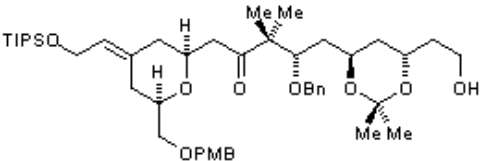

**11**  
(100 MHz, CDCl<sub>3</sub>)

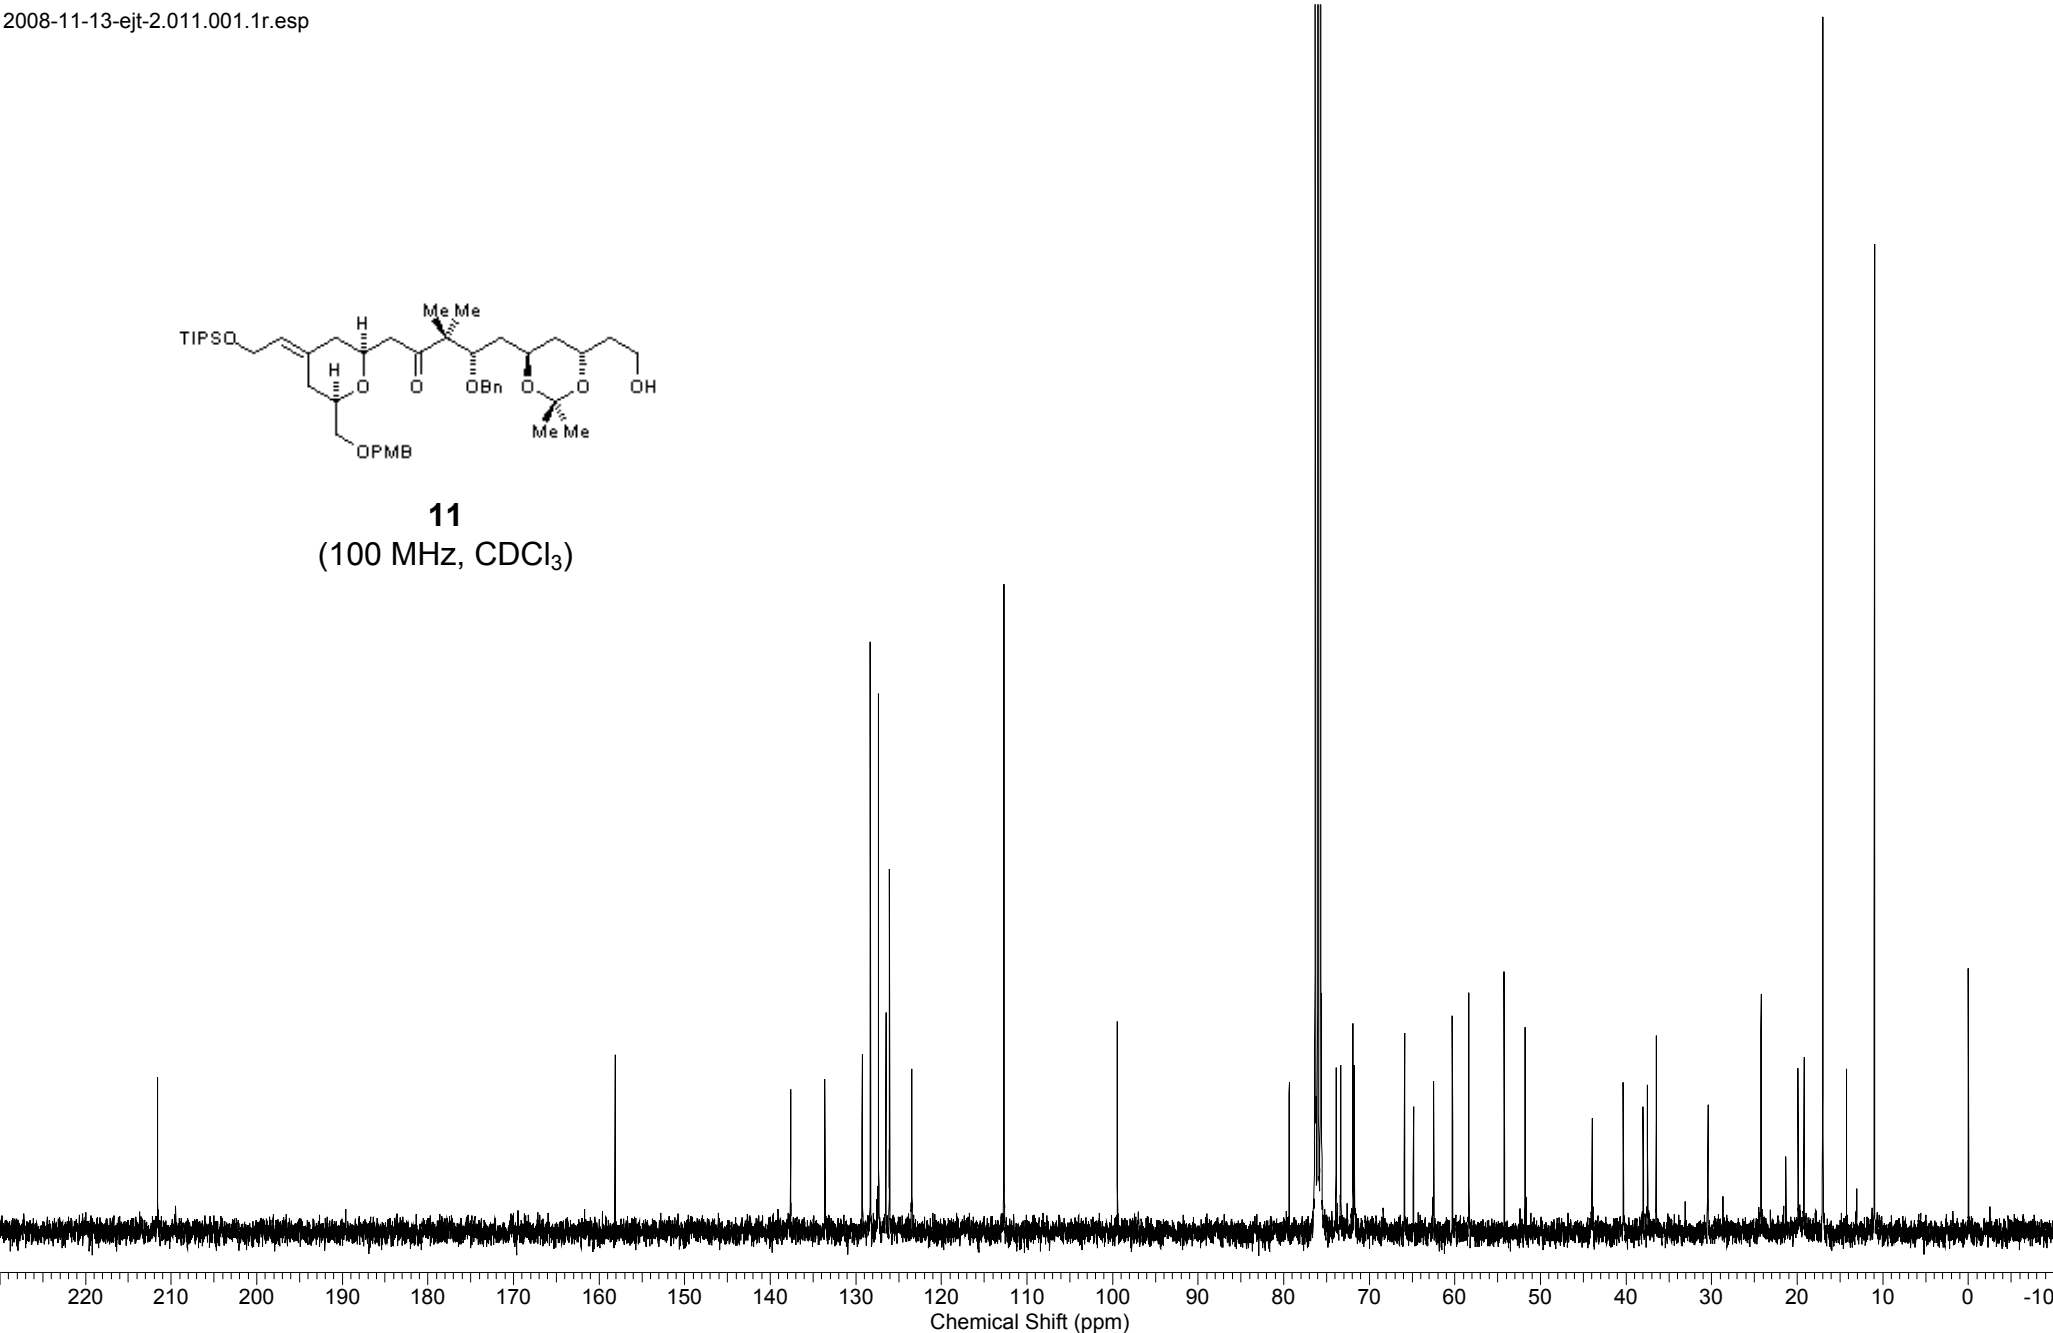

This report was created by ACD/NMR Processor Academic Edition. For more information go to [www.acdlabs.com/nmrproc/](http://www.acdlabs.com/nmrproc/)

Compound 12 mPROTONnight CDCl<sub>3</sub> {e:\bruk400data\2009\Apr} ejt 11

2009-04-26-ejt-11.010.001.1r.esp

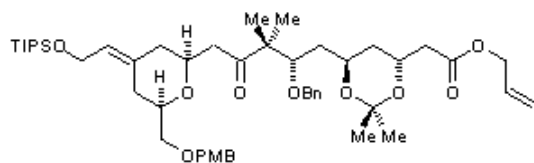

**12**  
(400 MHz, CDCl<sub>3</sub>)

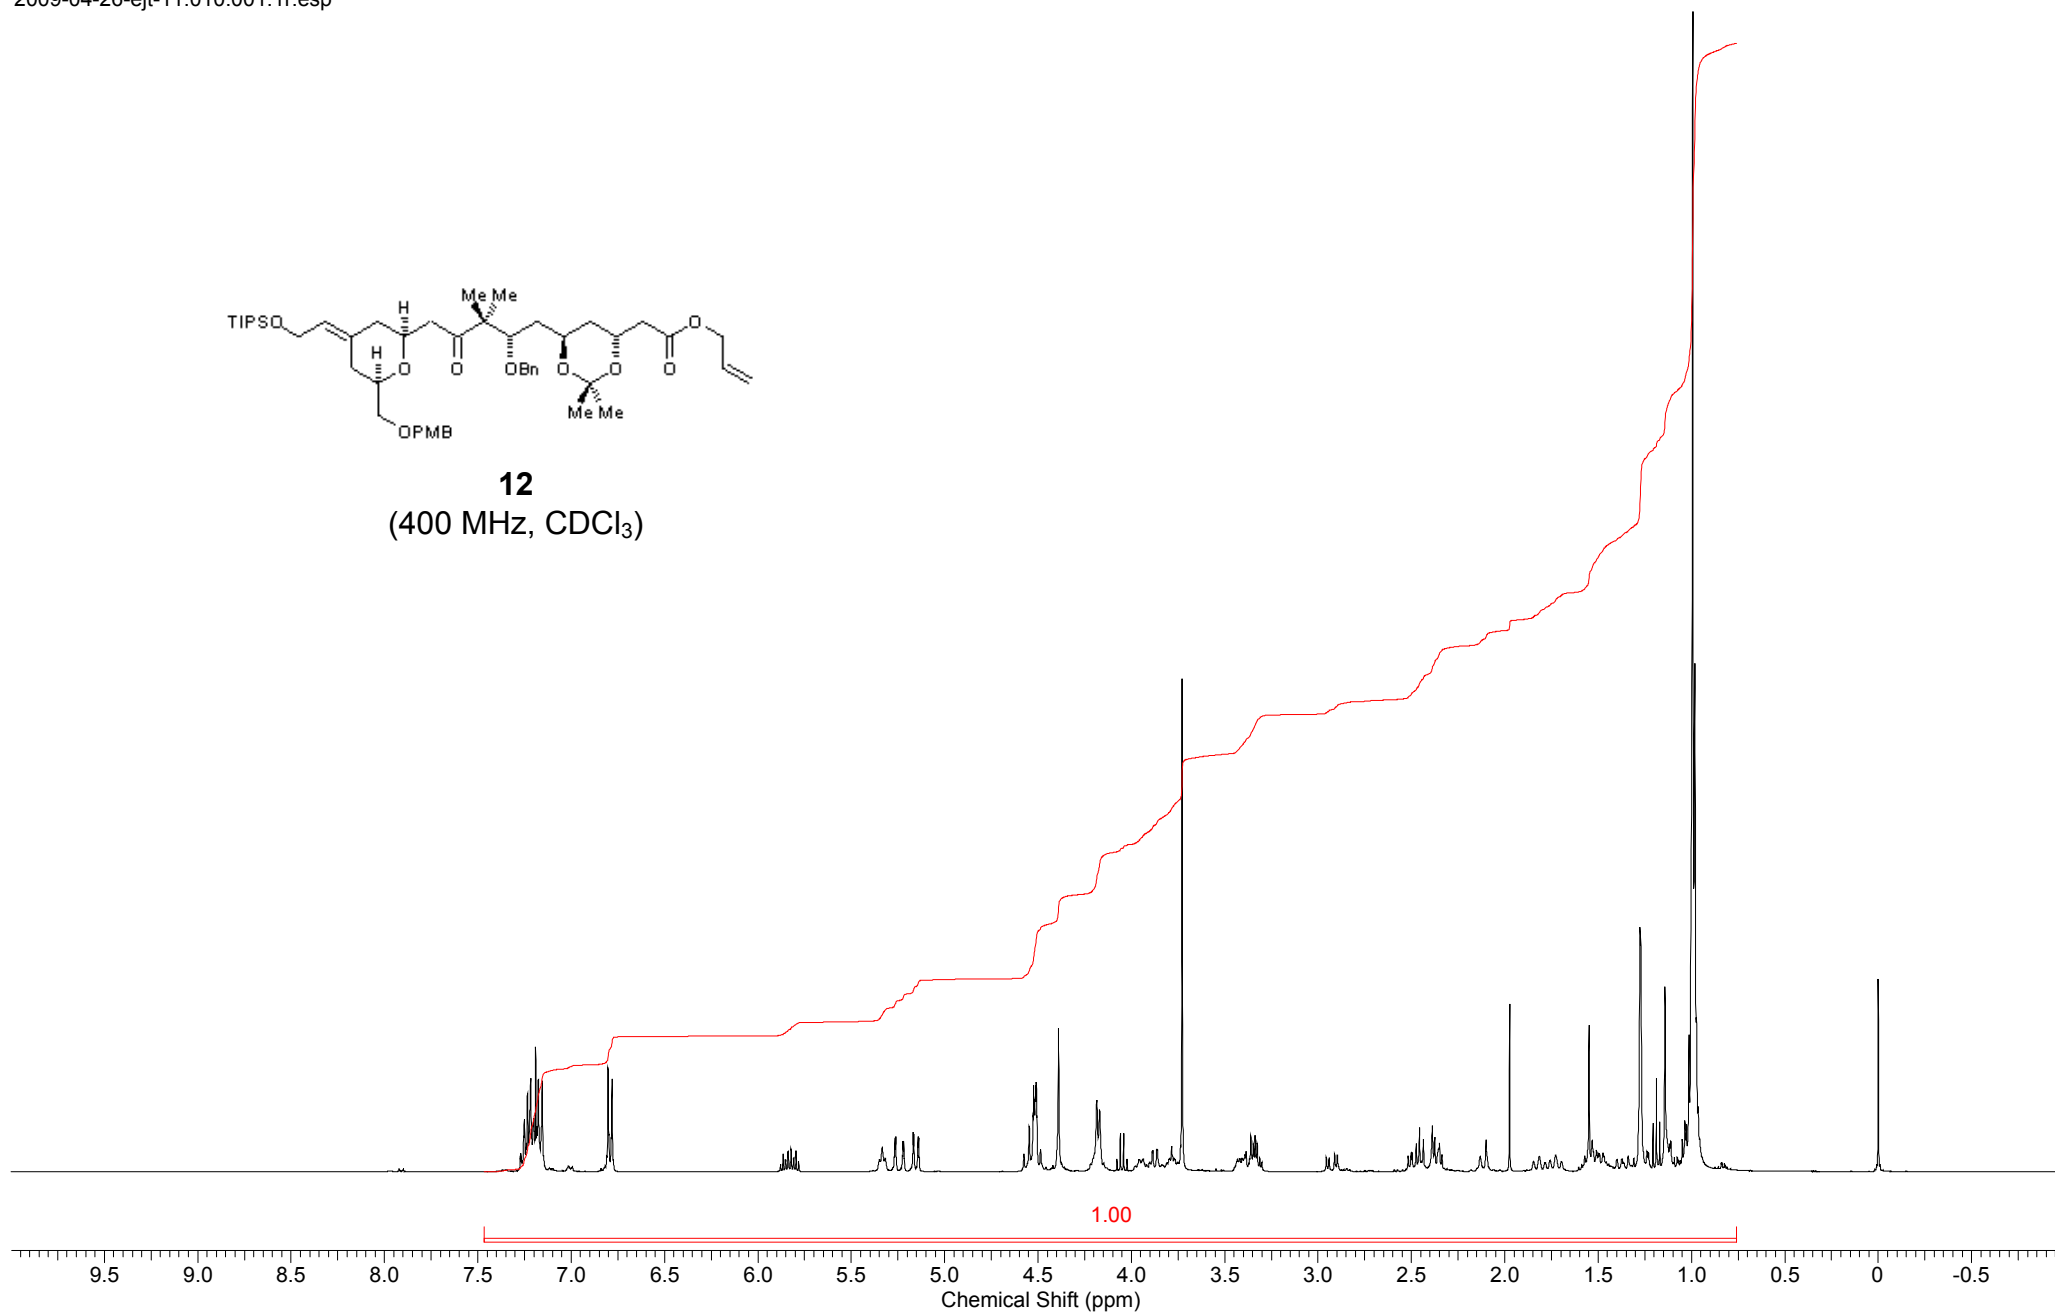

This report was created by ACD/NMR Processor Academic Edition. For more information go to [www.acdlabs.com/nmrproc/](http://www.acdlabs.com/nmrproc/)

Compound 12 mCARBONnight CDCl3 {e:\bruk400data\2009\Apr} ejt 11

2009-04-26-ejt-11.011.001.1r.esp

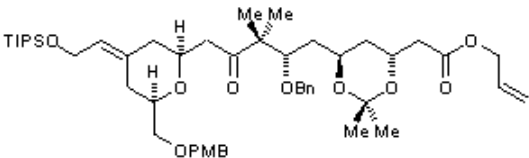

**12**  
(100 MHz, CDCl<sub>3</sub>)

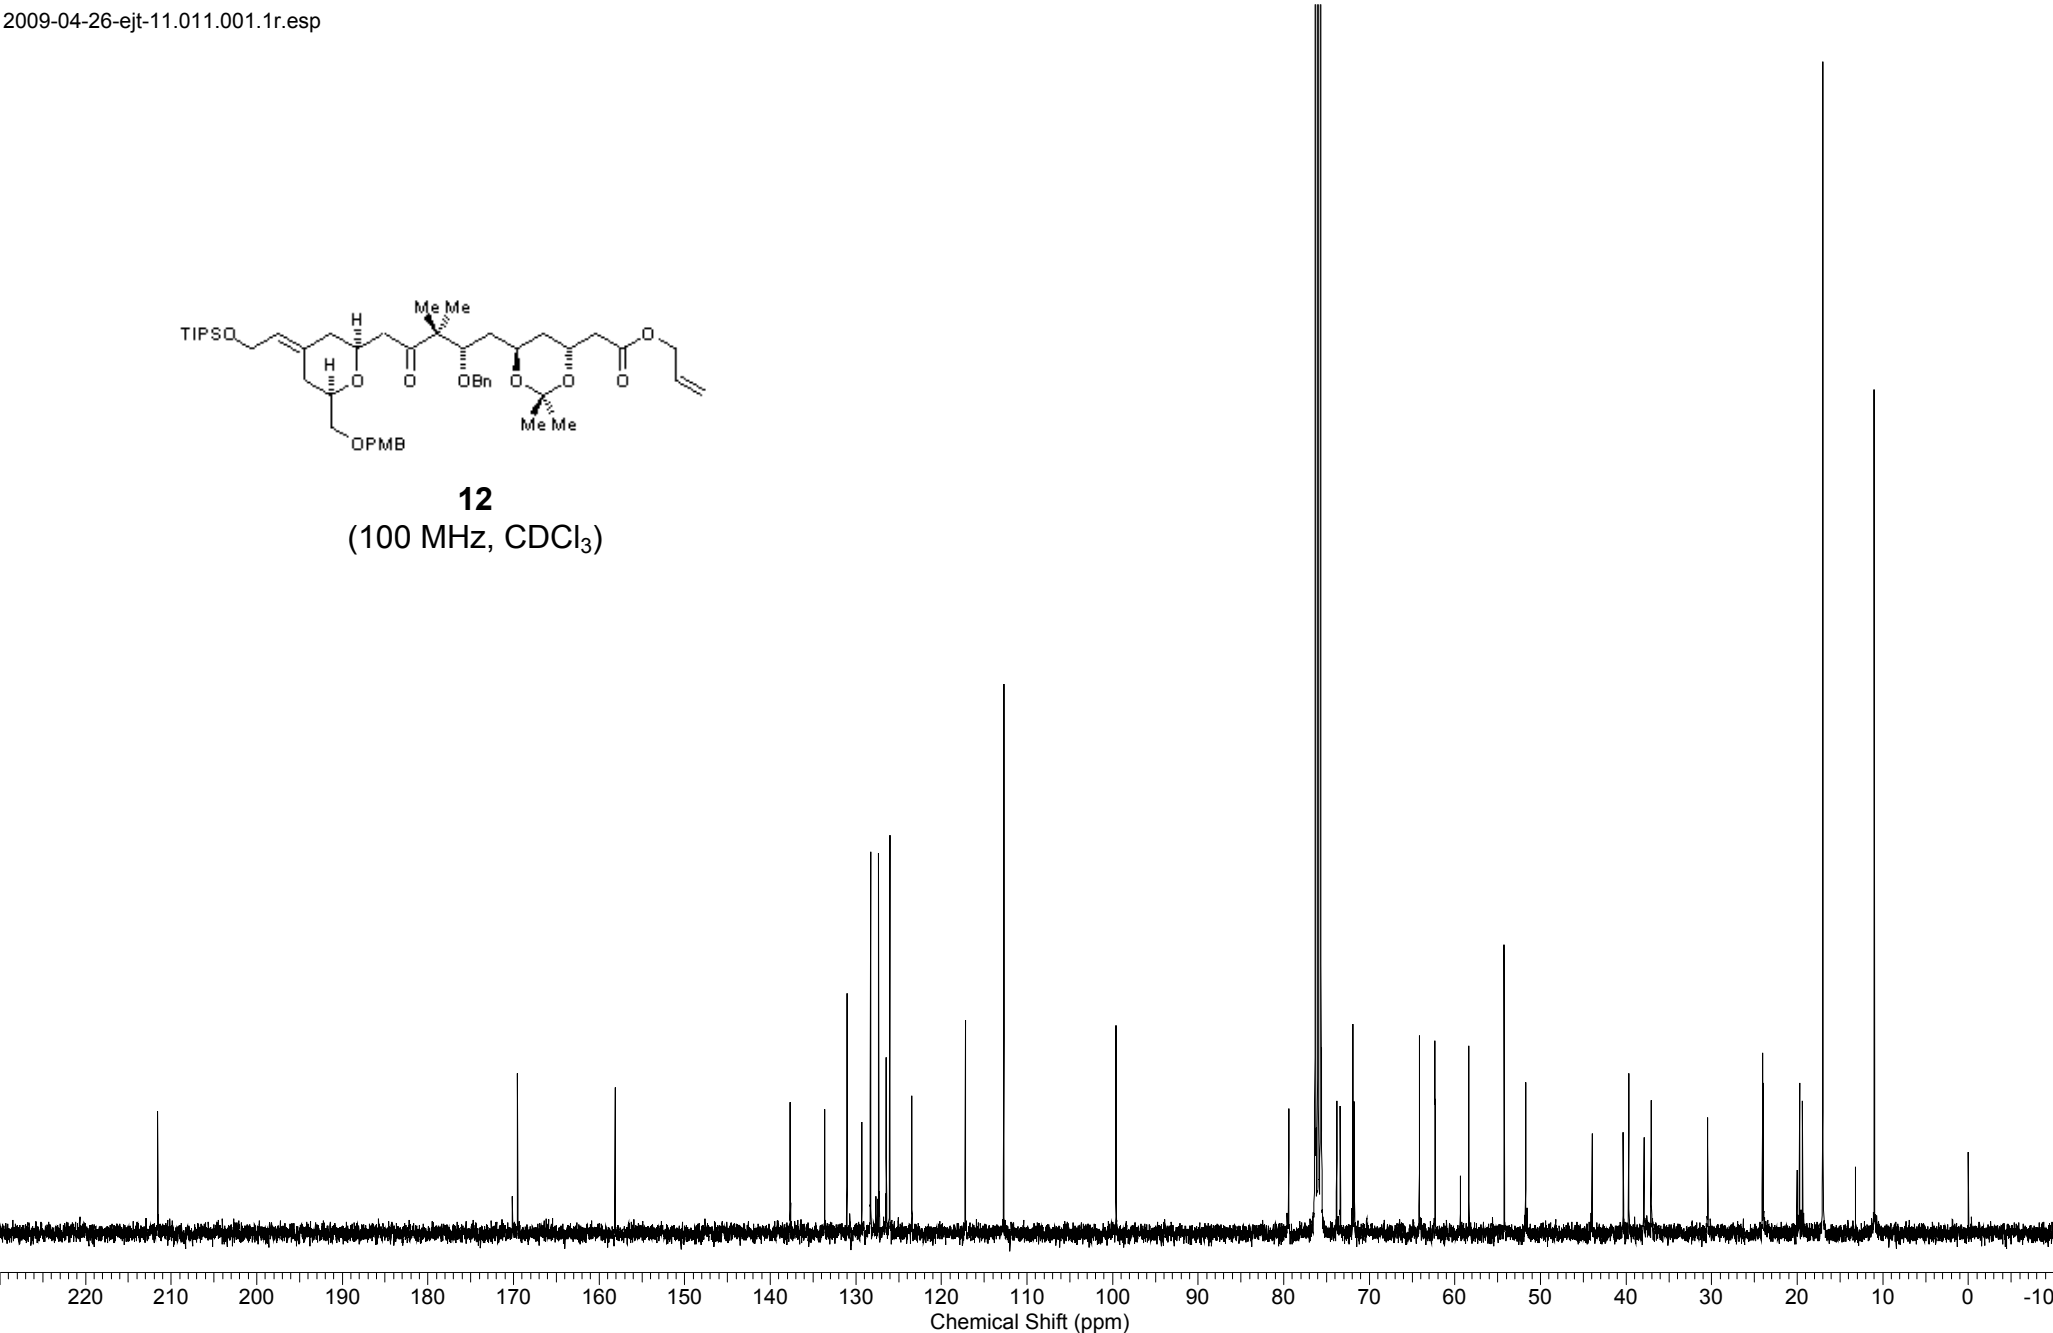

This report was created by ACD/NMR Processor Academic Edition. For more information go to [www.acdlabs.com/nmrproc/](http://www.acdlabs.com/nmrproc/)

Compound 15 mPROTONnight C6D6 {e:\bruk400data\2010\Mar} ejt 3

2010-03-18-ejt-3.010.001.1r.esp

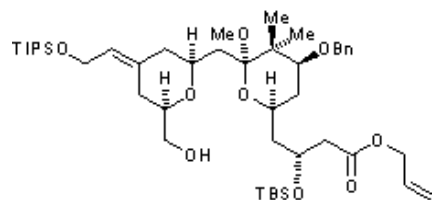

**15**  
(400 MHz, C<sub>6</sub>D<sub>6</sub>)

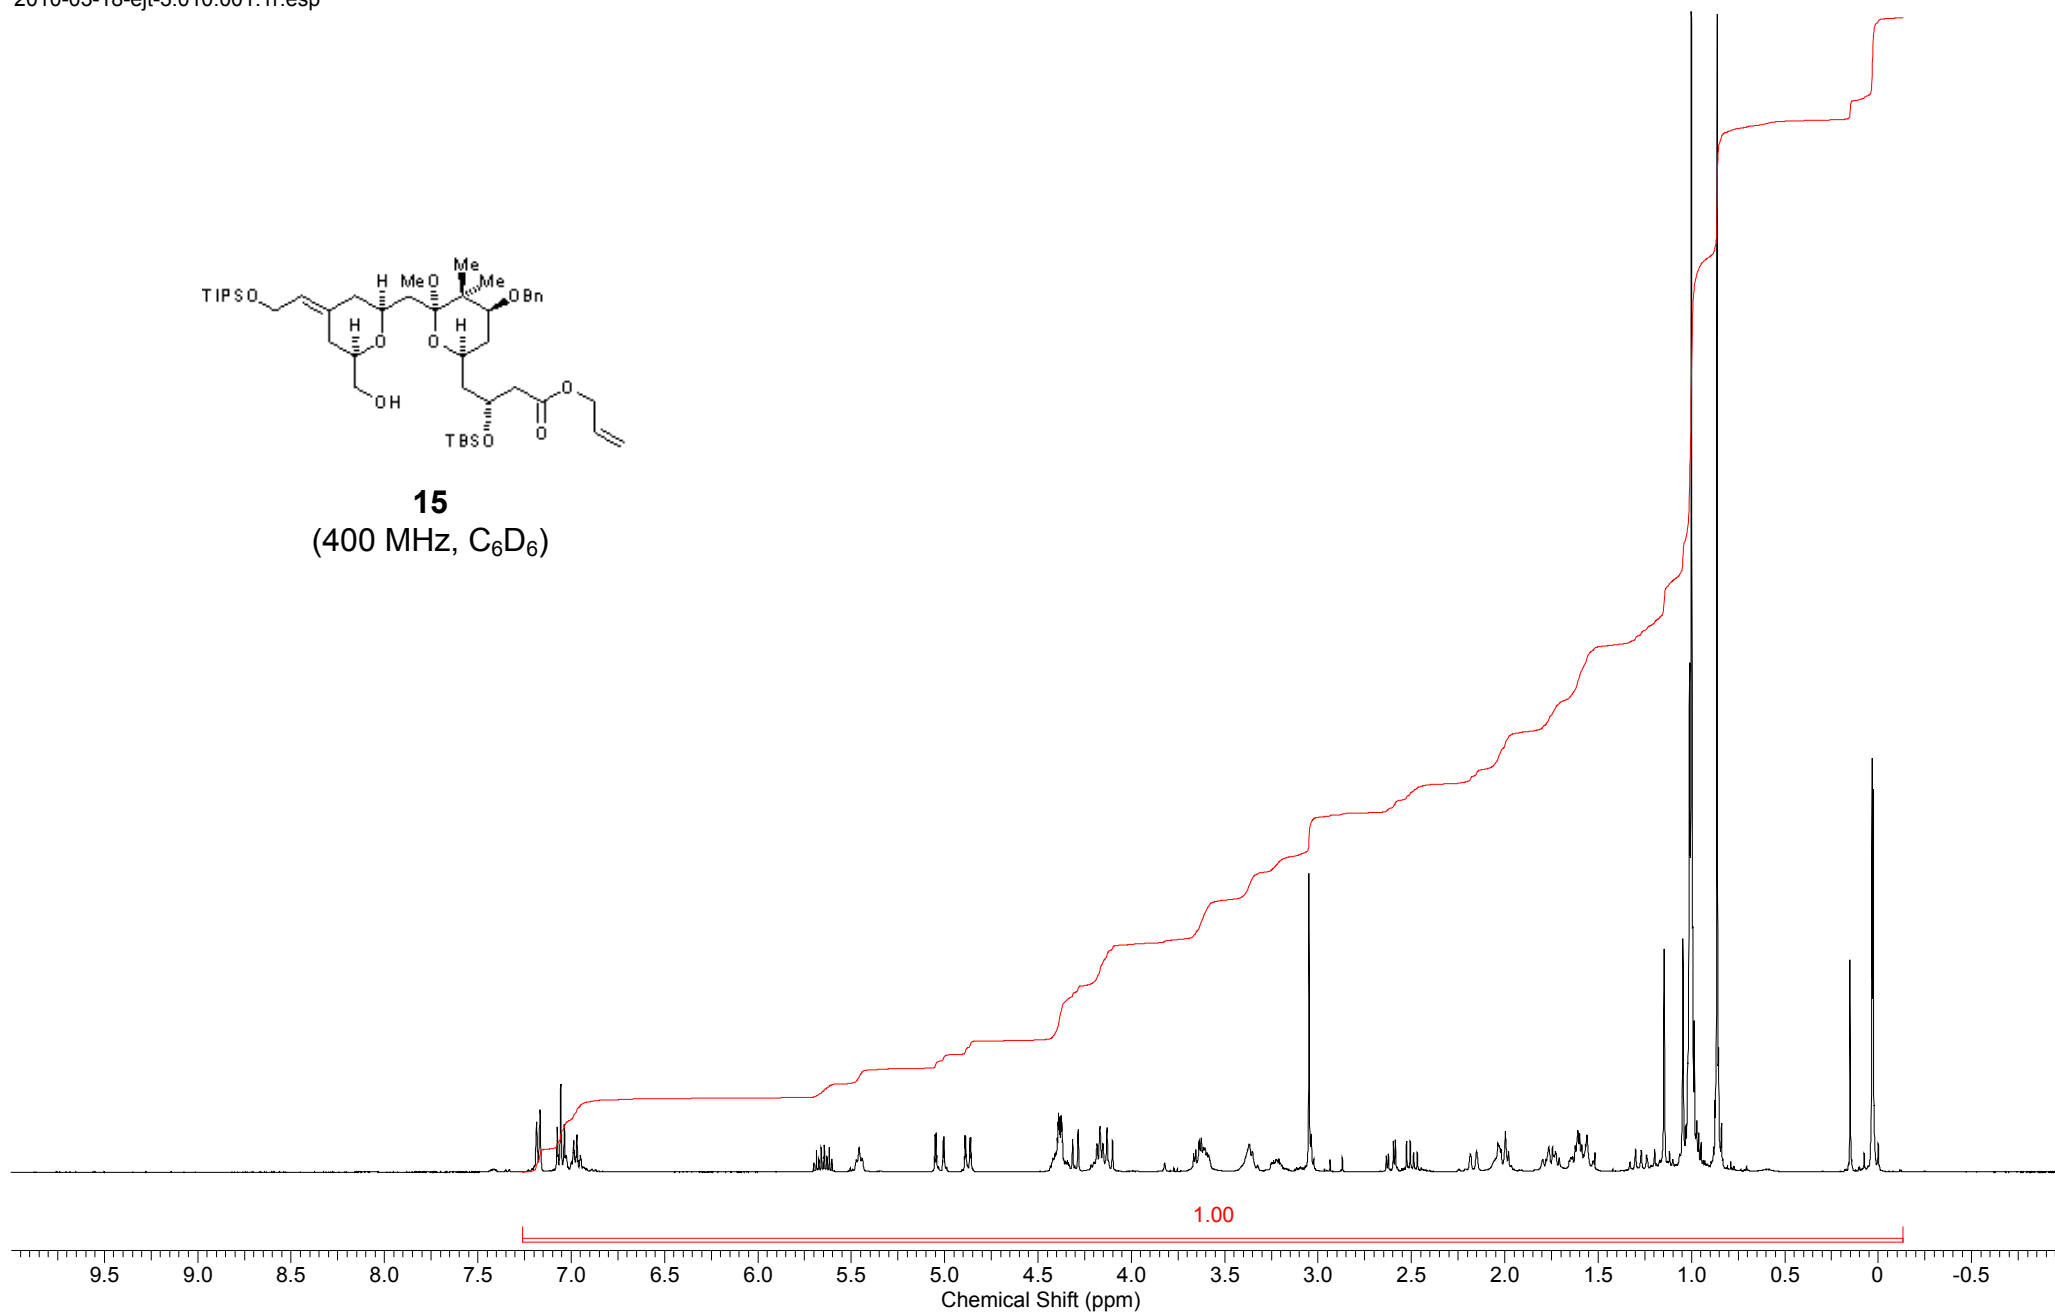



This report was created by ACD/NMR Processor Academic Edition. For more information go to [www.acdlabs.com/nmrproc/](http://www.acdlabs.com/nmrproc/)

Compound 21 mPROTON CDCl<sub>3</sub> /opt/bruk500data/2009/Feb ejt 12

2009-02-03-ejt-12.010.001.1r.esp

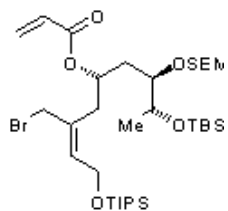

**21**  
(500 MHz, CDCl<sub>3</sub>)

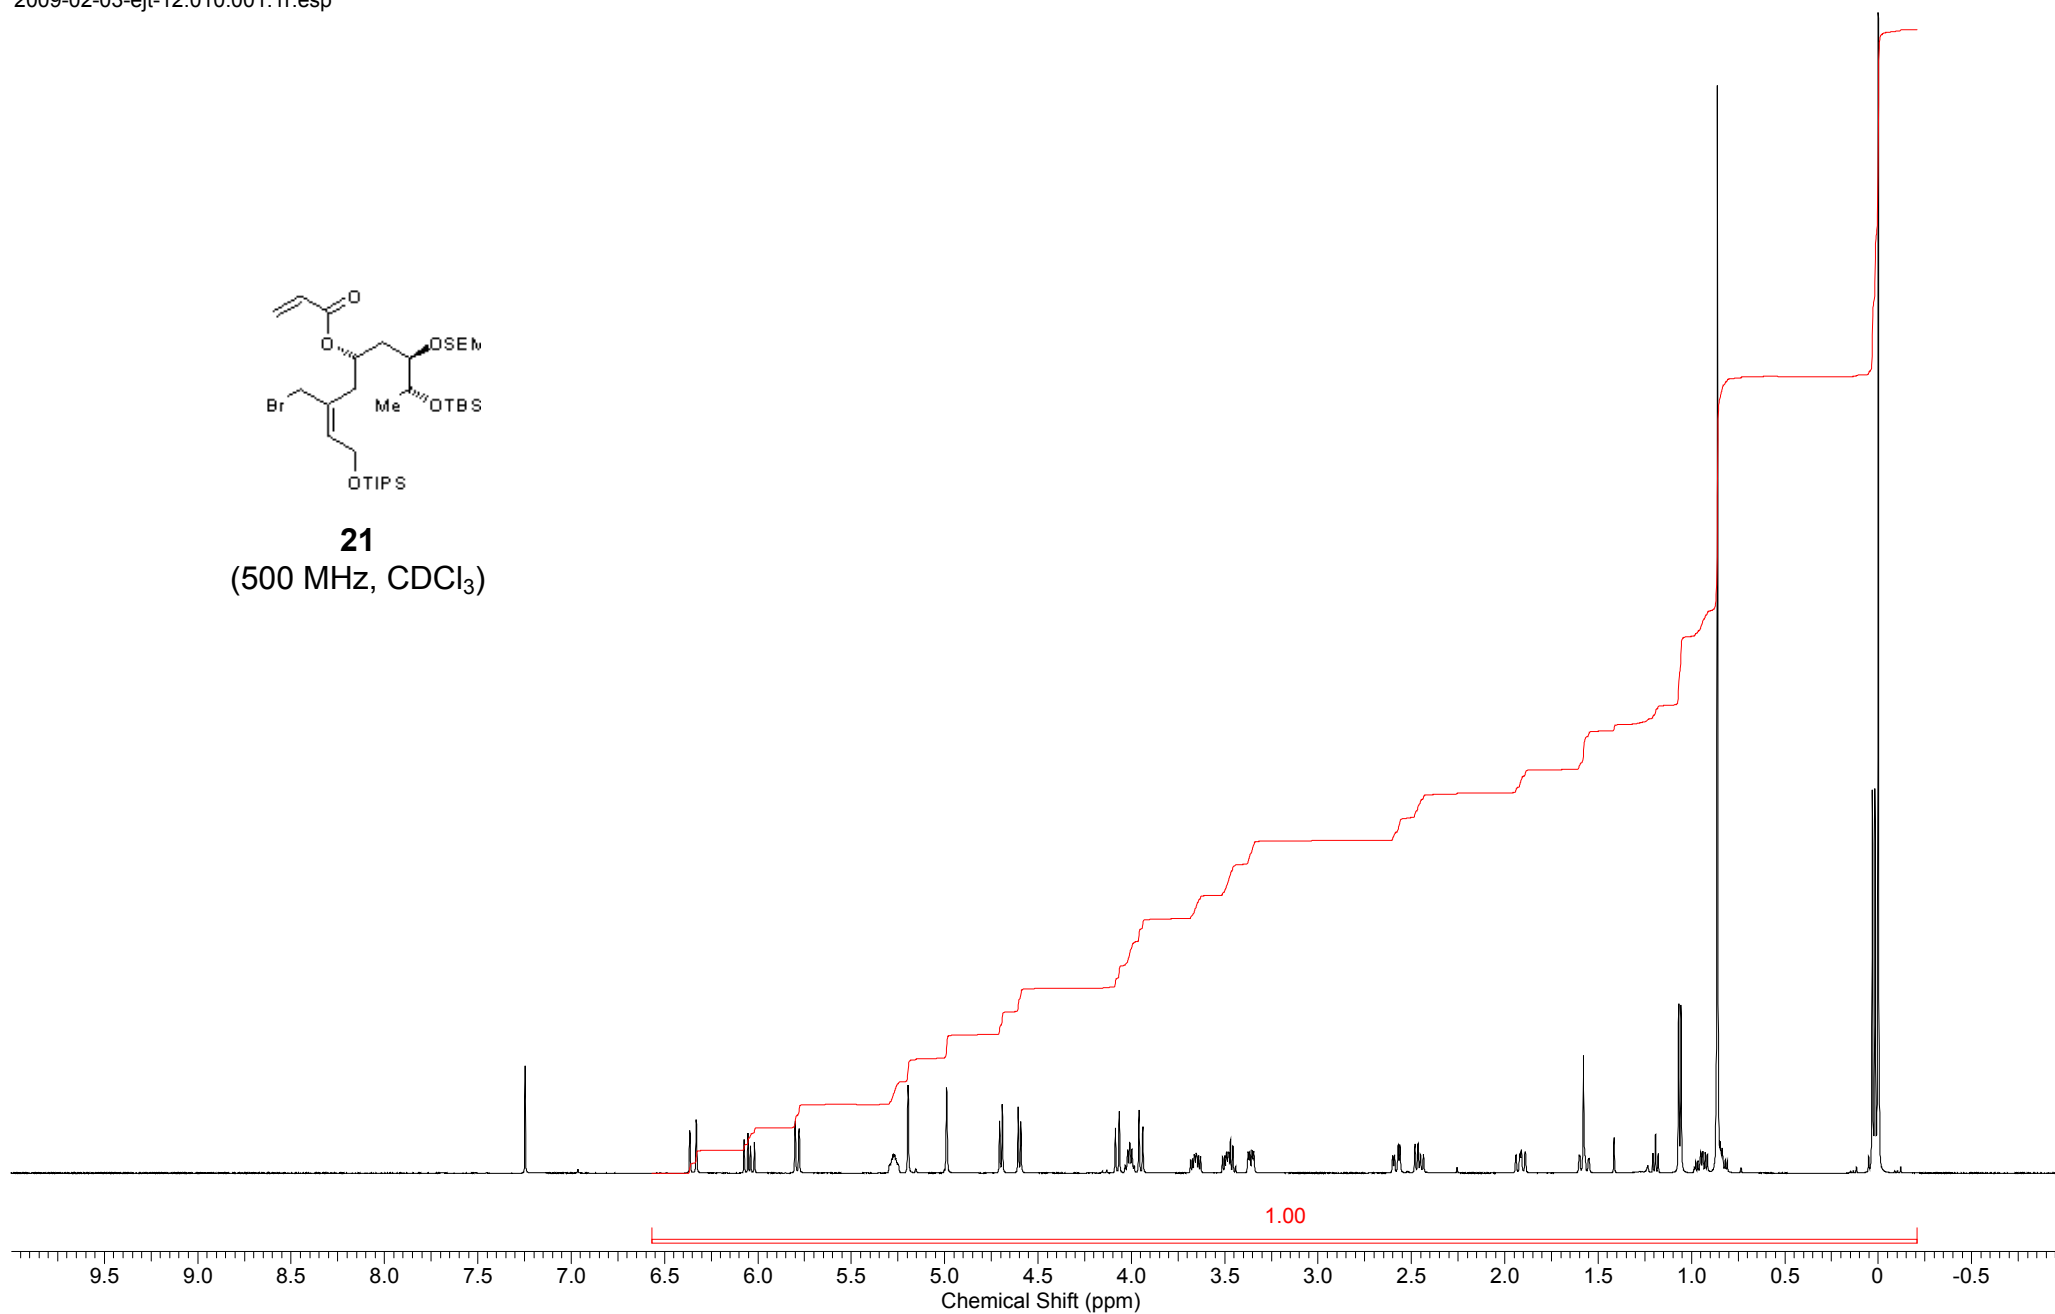



This report was created by ACD/NMR Processor Academic Edition. For more information go to [www.acdlabs.com/nmrproc/](http://www.acdlabs.com/nmrproc/)

Compound 21 mCARBONnight CDCl3 /opt/bruk500data/2009/Feb ejt 14

2009-02-03-ejt-14.010.001.1r.esp

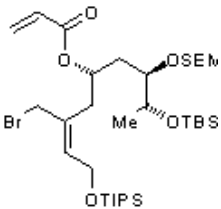

**21**  
(125 MHz, CDCl<sub>3</sub>)

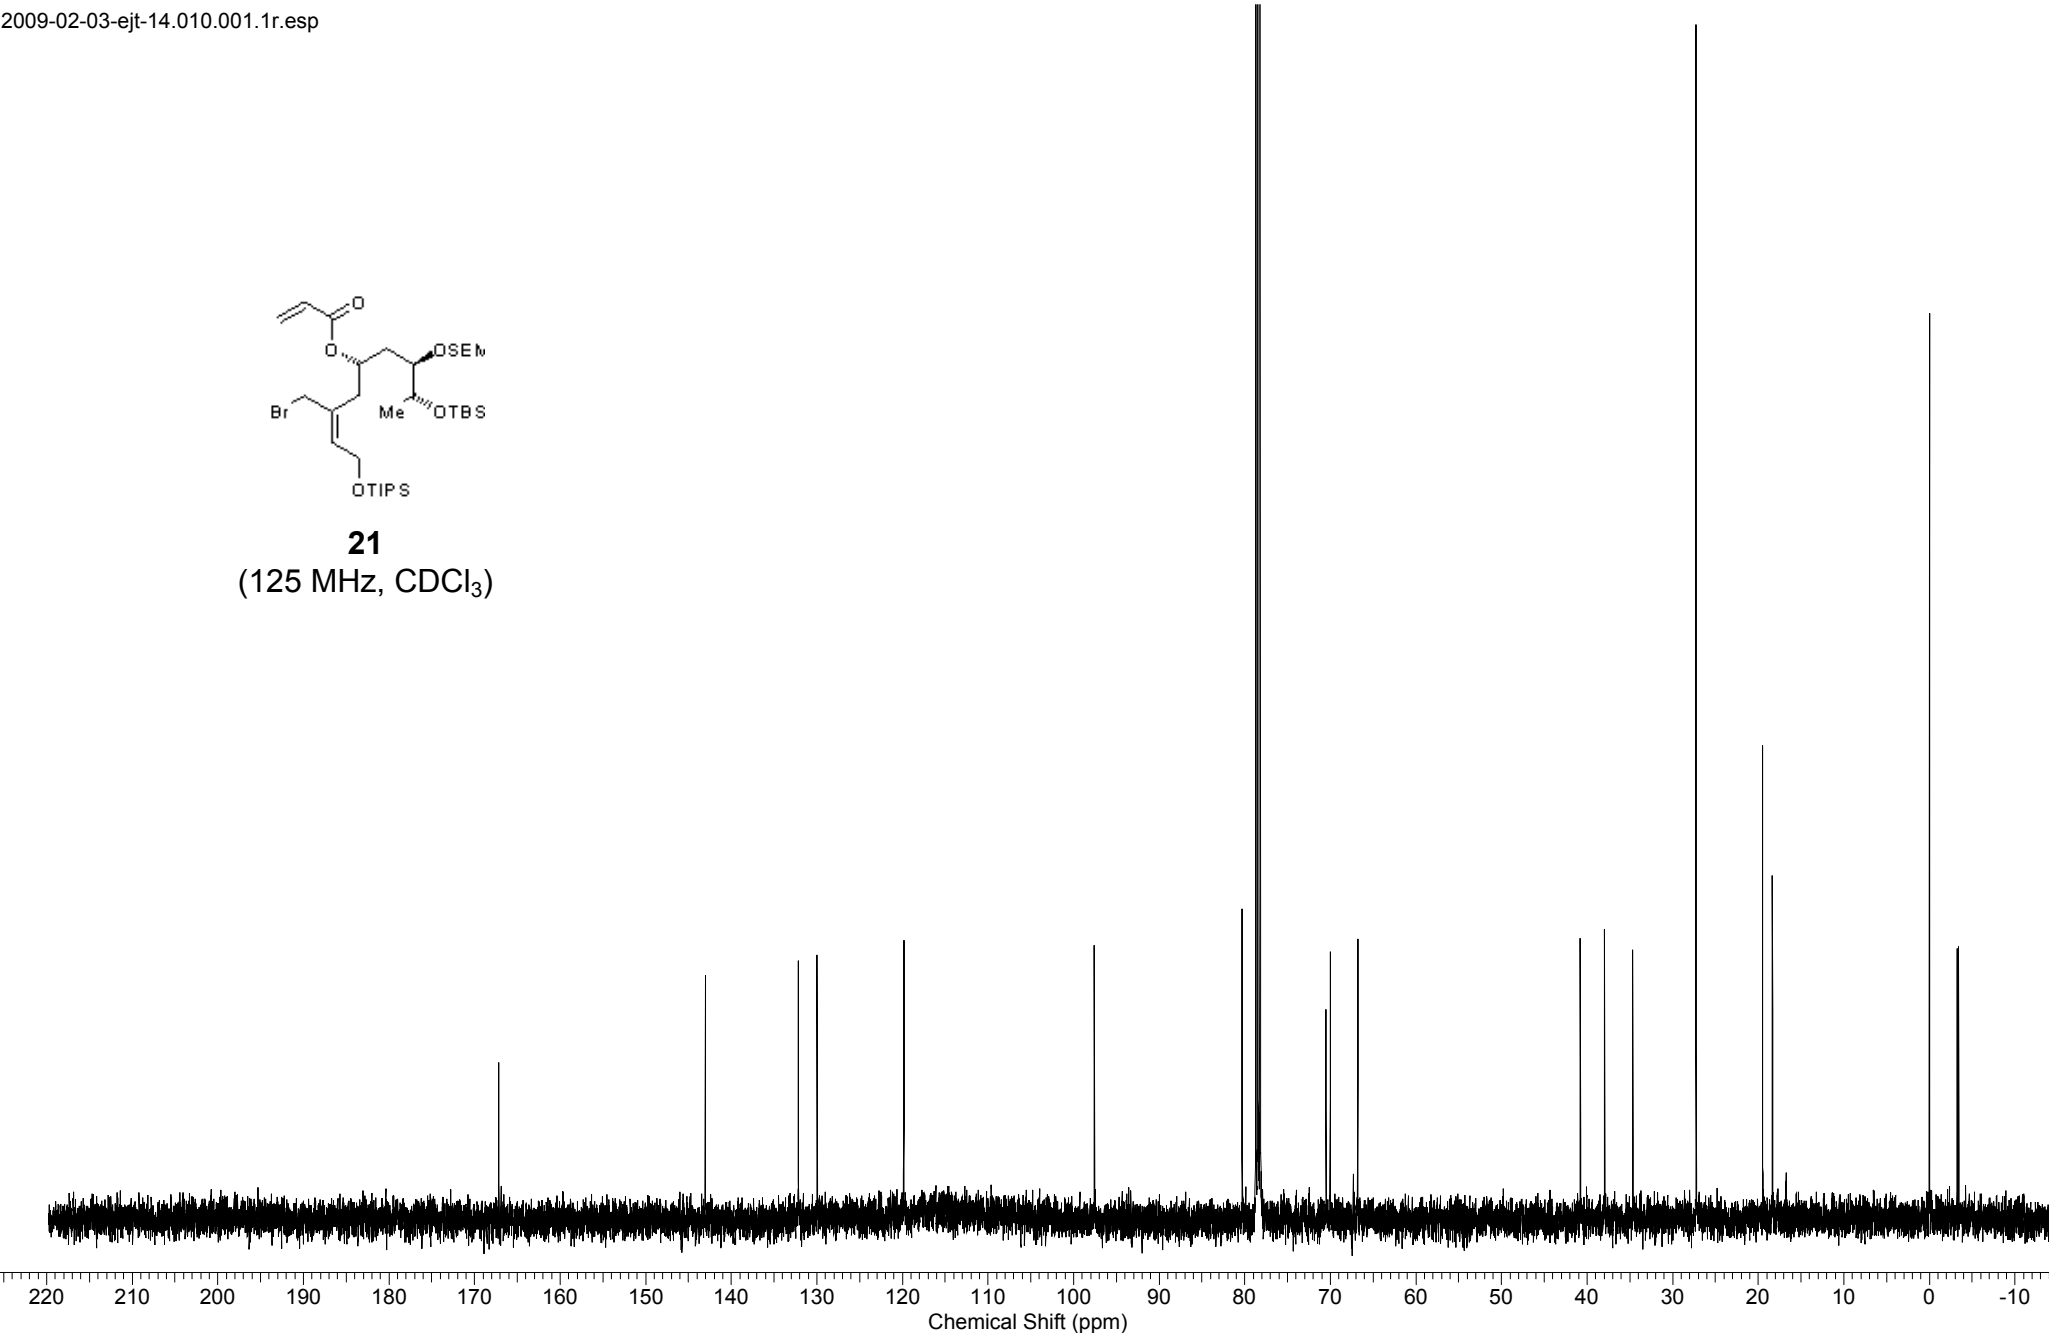

This report was created by ACD/NMR Processor Academic Edition. For more information go to [www.acdlabs.com/nmrproc/](http://www.acdlabs.com/nmrproc/)

Compound 23 mPROTONnight CDCl<sub>3</sub> {e:\bruk400data\2009\Feb} ejt 1

2009-02-18-ejt-1.010.001.1r.esp

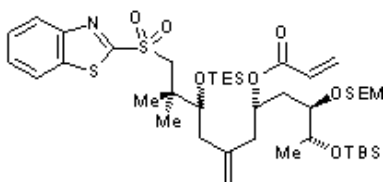

**24**  
(400 MHz, CDCl<sub>3</sub>)

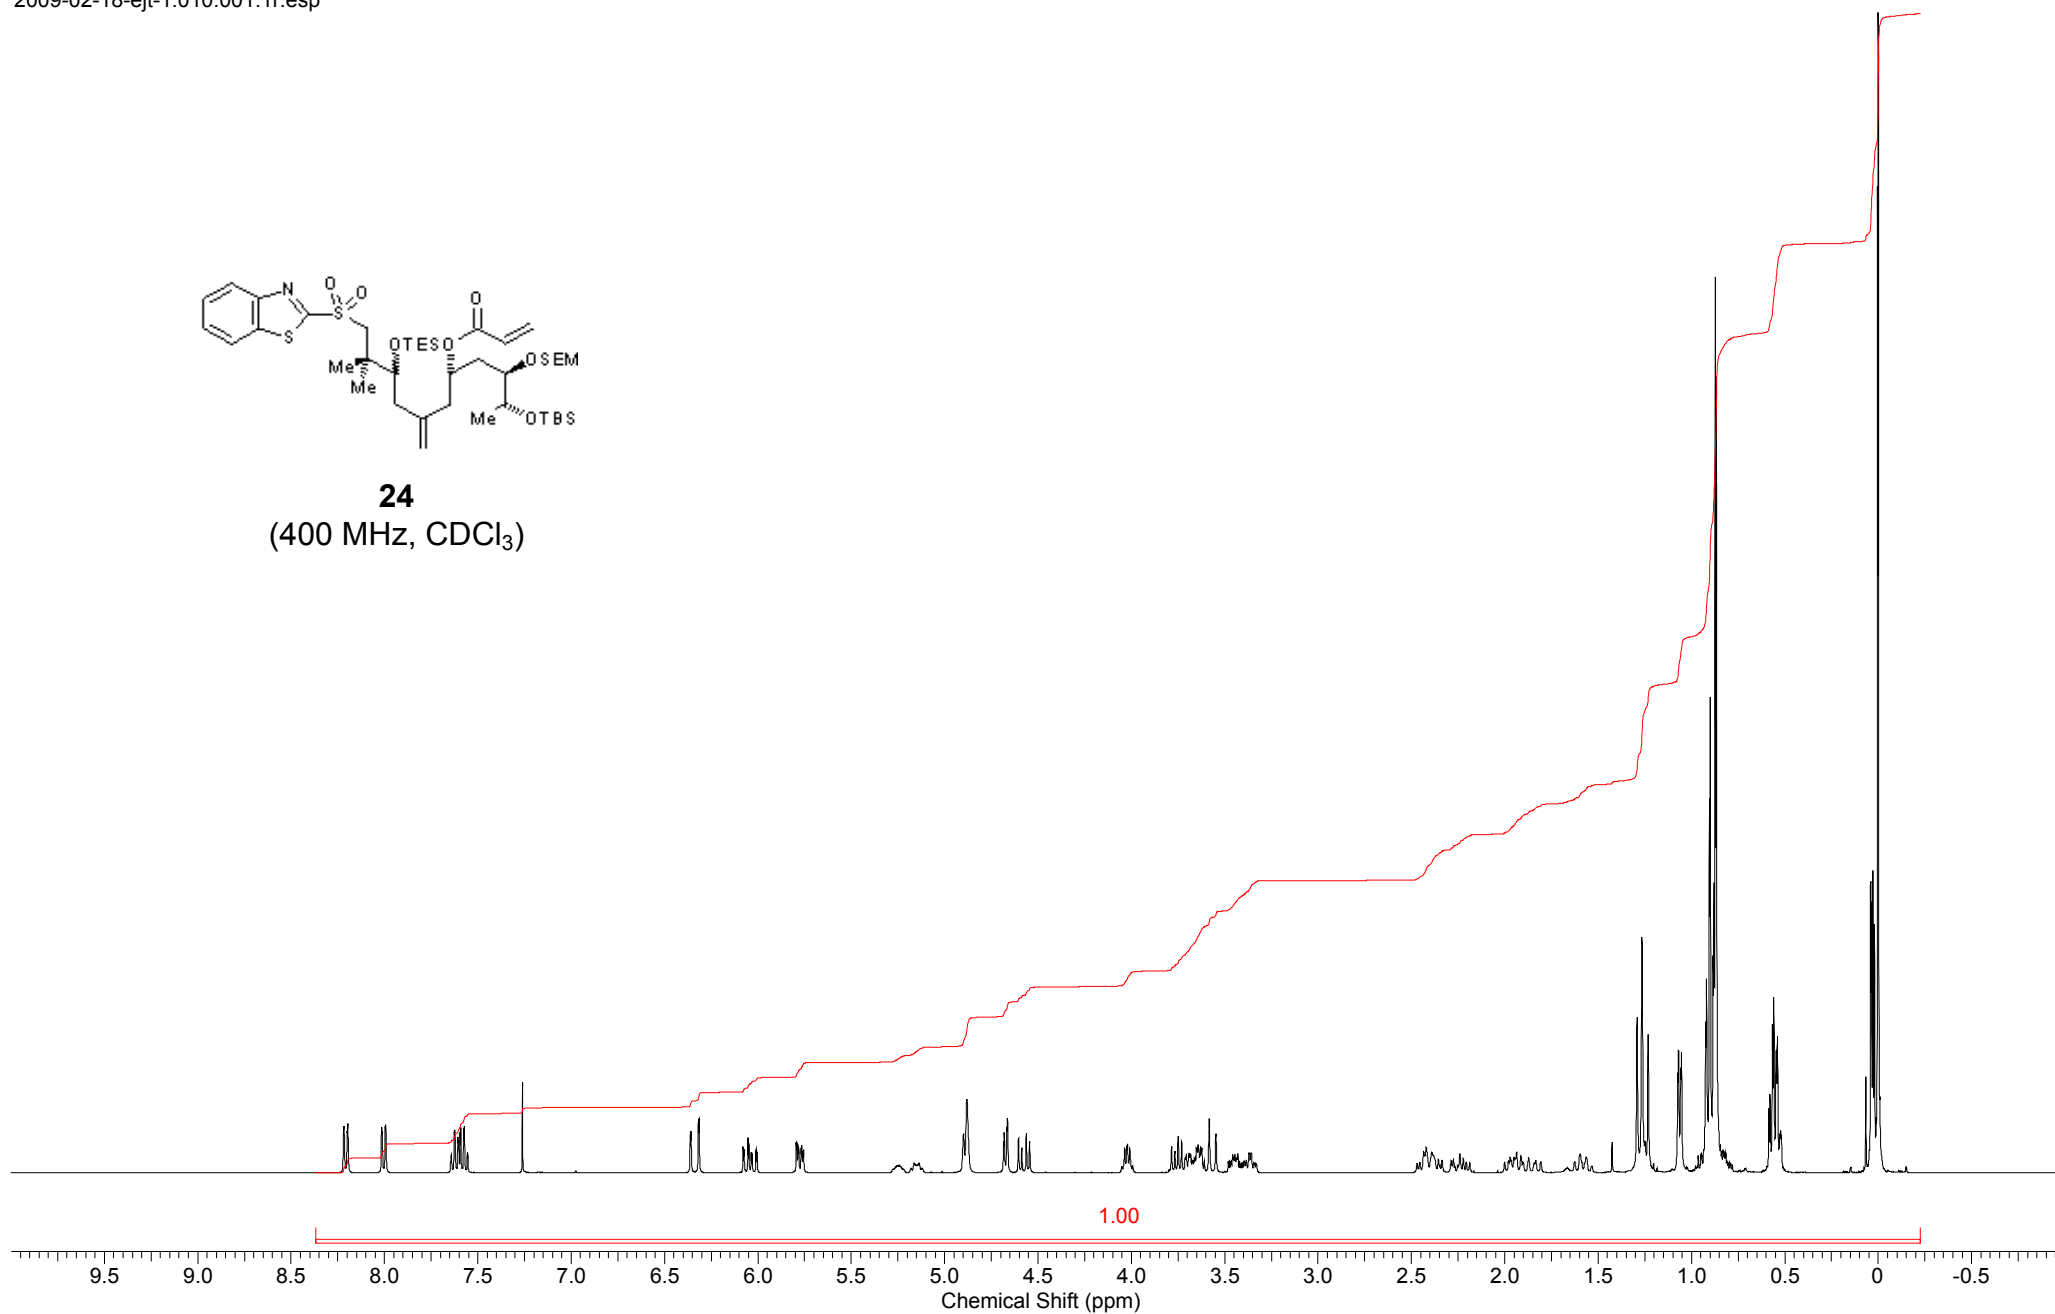

This report was created by ACD/NMR Processor Academic Edition. For more information go to [www.acdlabs.com/nmrproc/](http://www.acdlabs.com/nmrproc/)

Compound 23 mCARBONnight CDCl<sub>3</sub> {e:\bruk400data\2009\Feb} ejt 1

2009-02-18-ejt-1.012.001.1r.esp

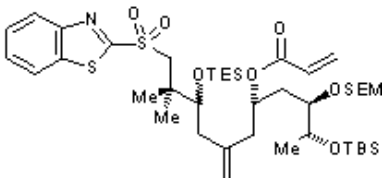

**24**  
(100 MHz, CDCl<sub>3</sub>)

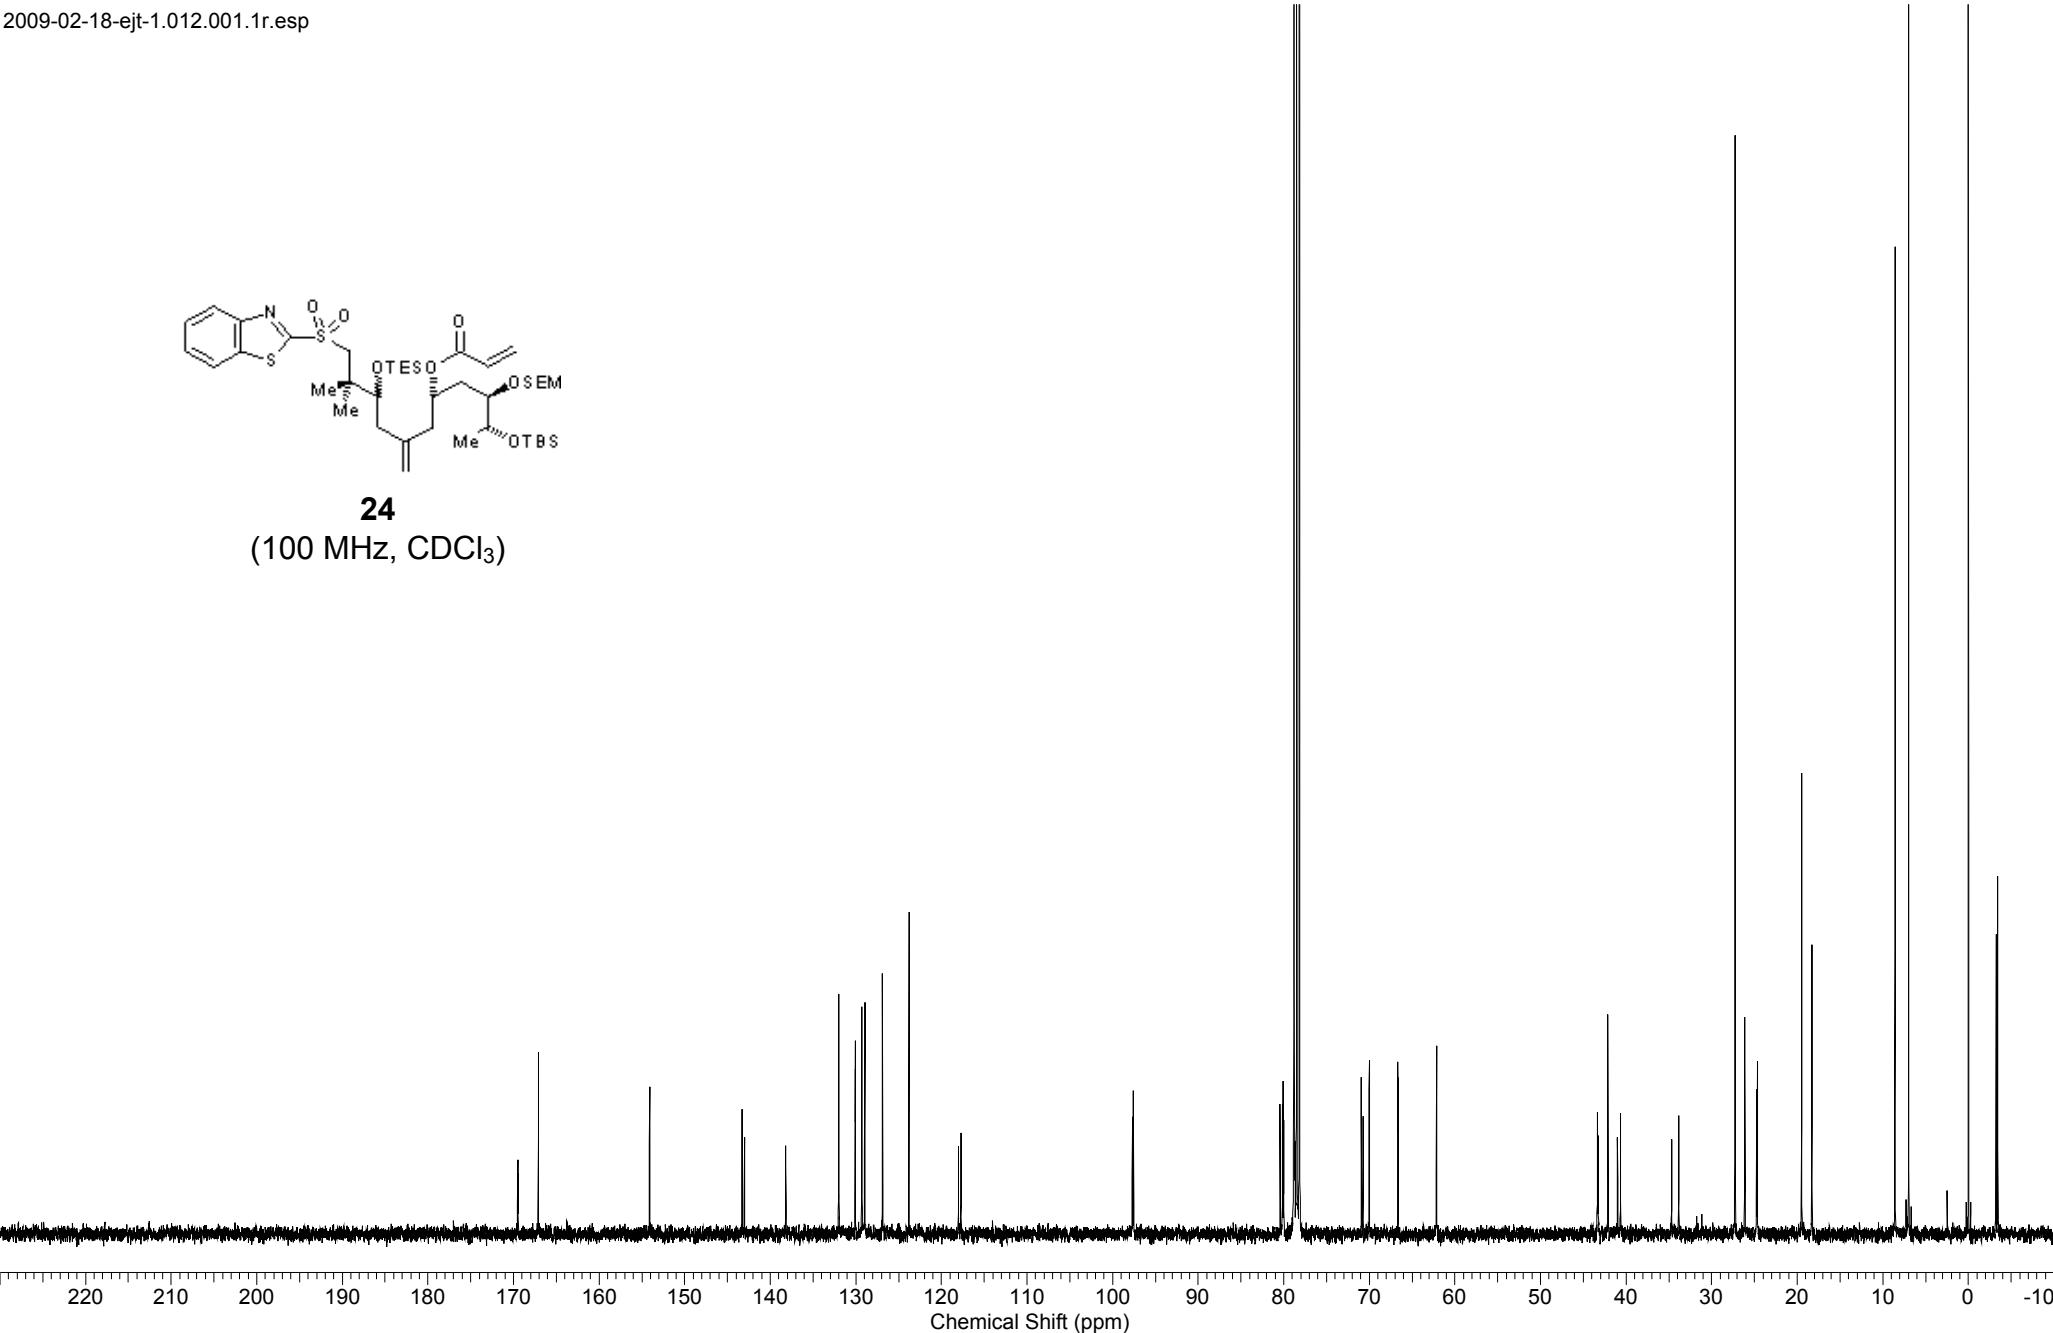

This report was created by ACD/NMR Processor Academic Edition. For more information go to [www.acdlabs.com/nmrproc/](http://www.acdlabs.com/nmrproc/)

Compound 24 mPROTON CDCl<sub>3</sub> {e:\bruk400data\2009\Feb} ejt 5

2009-02-20-ejt-5.010.001.1r.esp

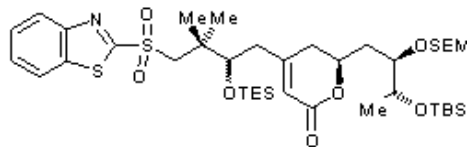

**25**  
(400 MHz, CDCl<sub>3</sub>)

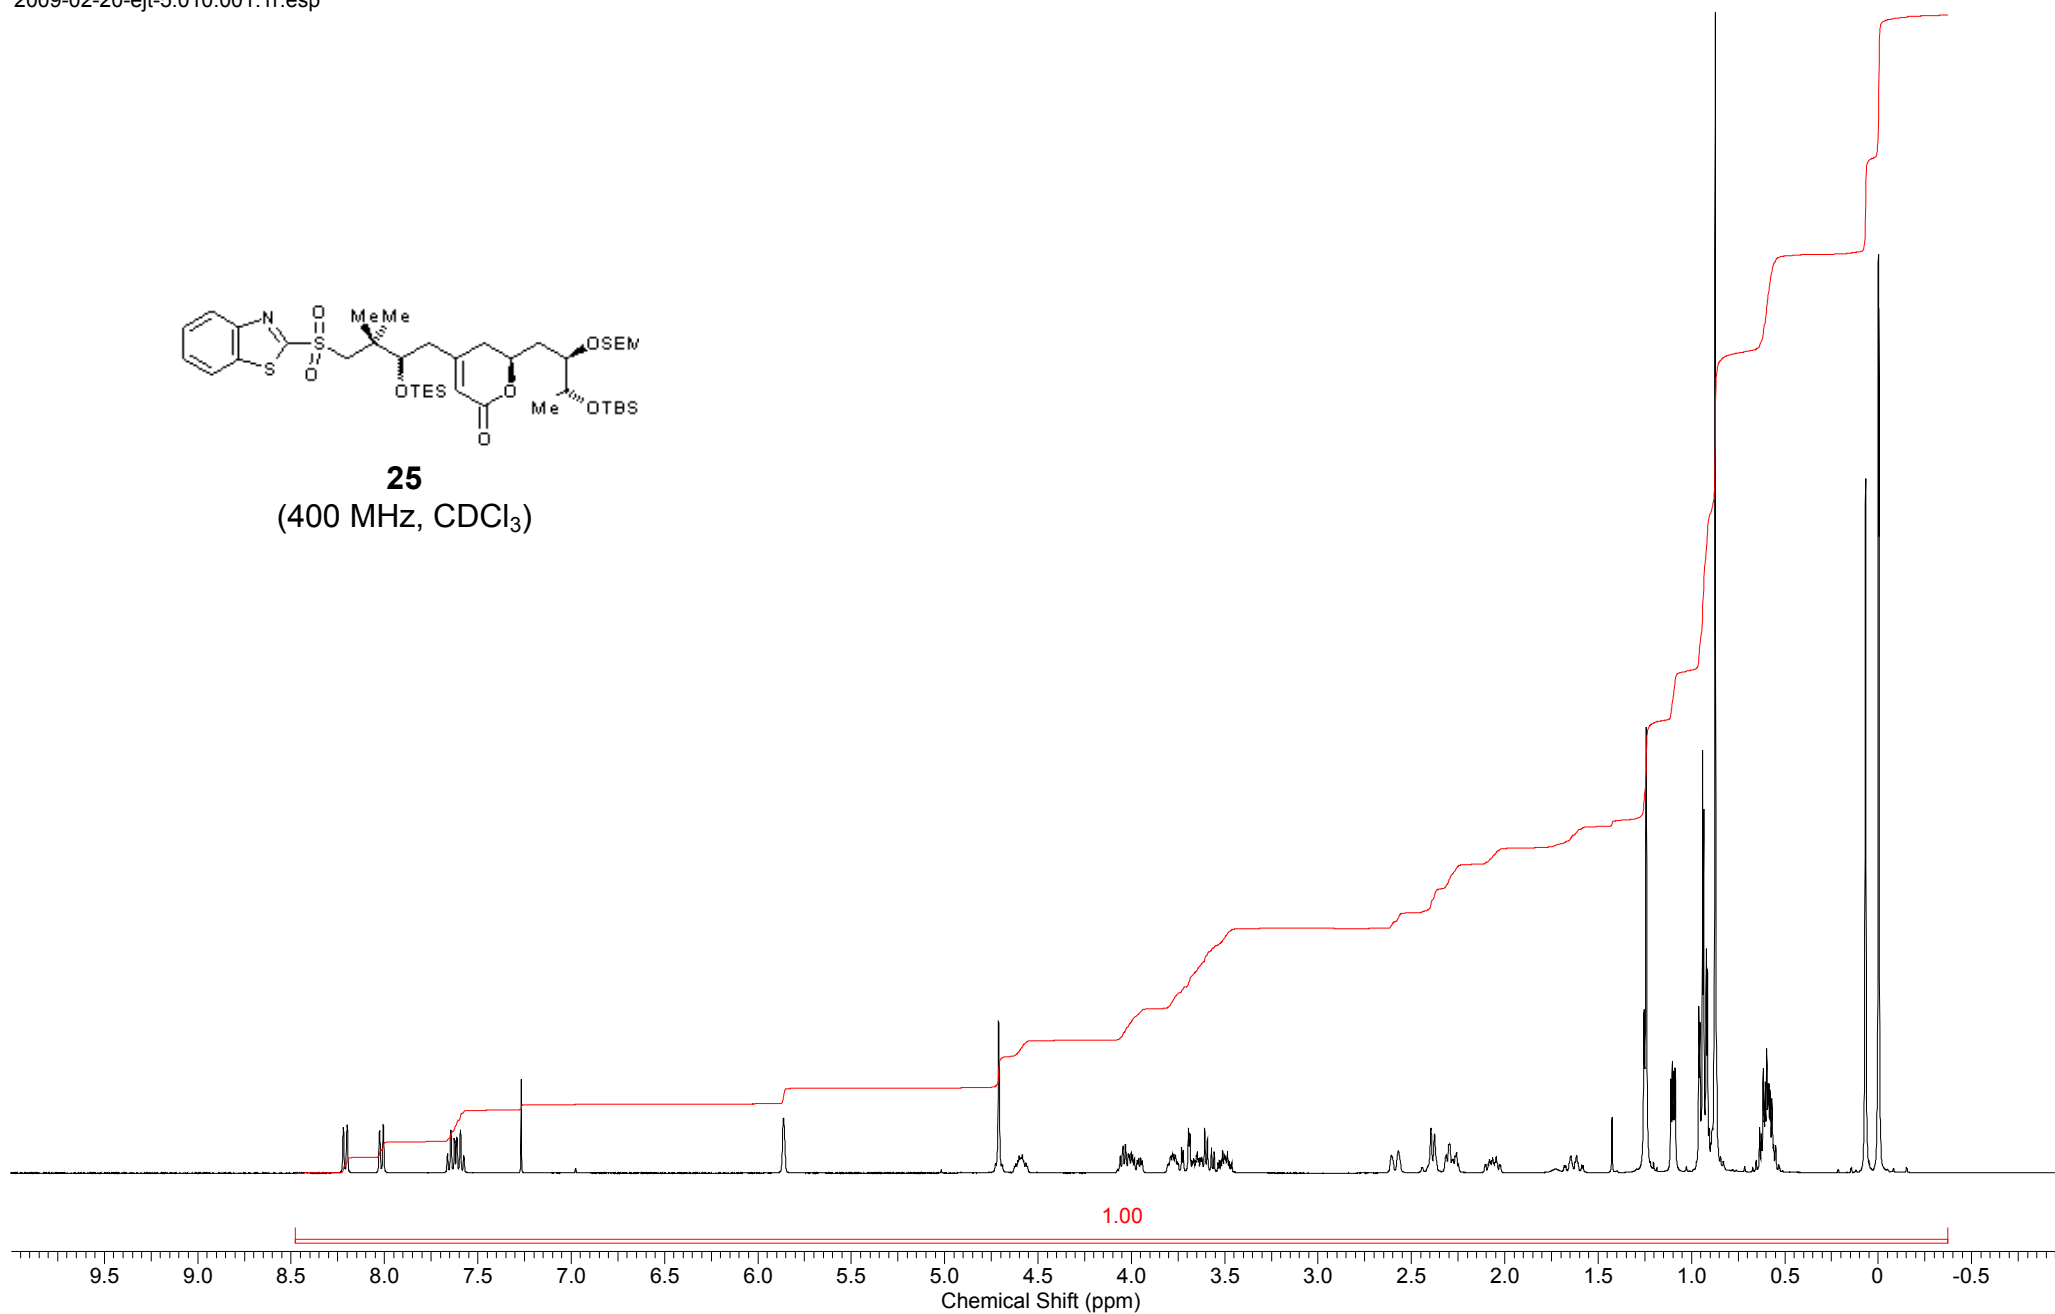

This report was created by ACD/NMR Processor Academic Edition. For more information go to [www.acdlabs.com/nmrproc/](http://www.acdlabs.com/nmrproc/)

Compound 24 mCARBON CDCl3 {e:\bruk400data\2009\Feb} ejt 5

2009-02-20-ejt-5.011.001.1r.esp

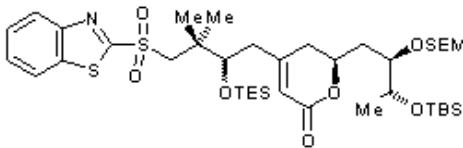

**25**  
(100 MHz, CDCl<sub>3</sub>)

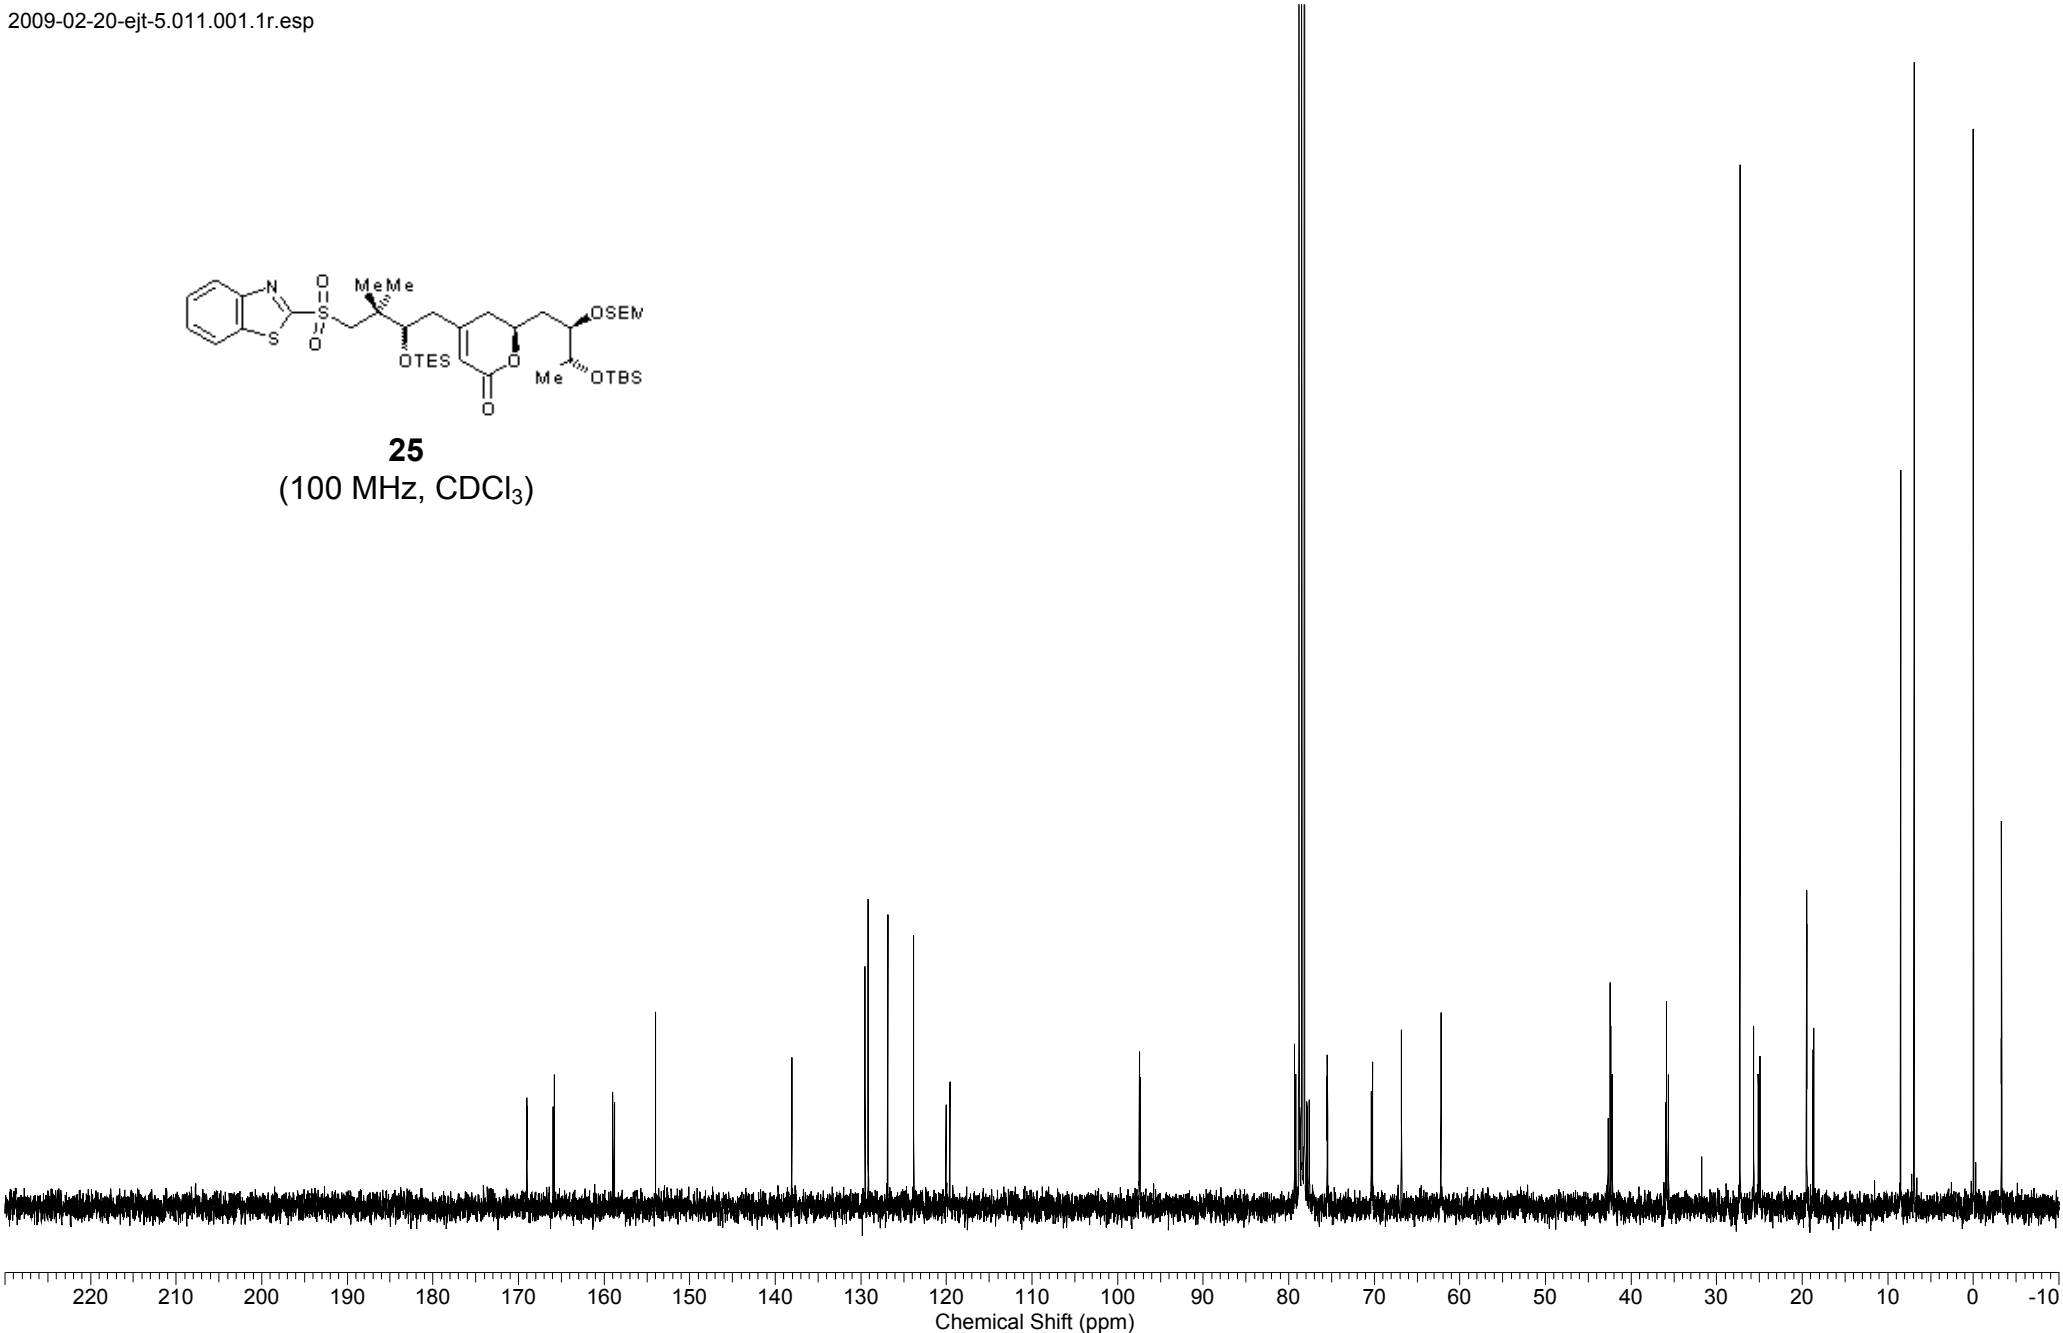

This report was created by ACD/NMR Processor Academic Edition. For more information go to [www.acdlabs.com/nmrproc/](http://www.acdlabs.com/nmrproc/)

Compound 4 mPROTON CDCl<sub>3</sub> /opt/bruk500data/2009/Mar ejt 31

2009-03-02-ejt-31.010.001.1r.esp

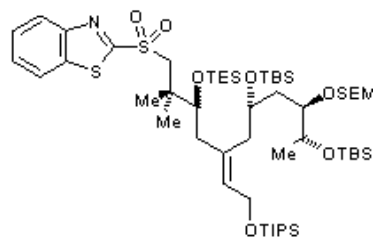

**4**  
(500 MHz, CDCl<sub>3</sub>)

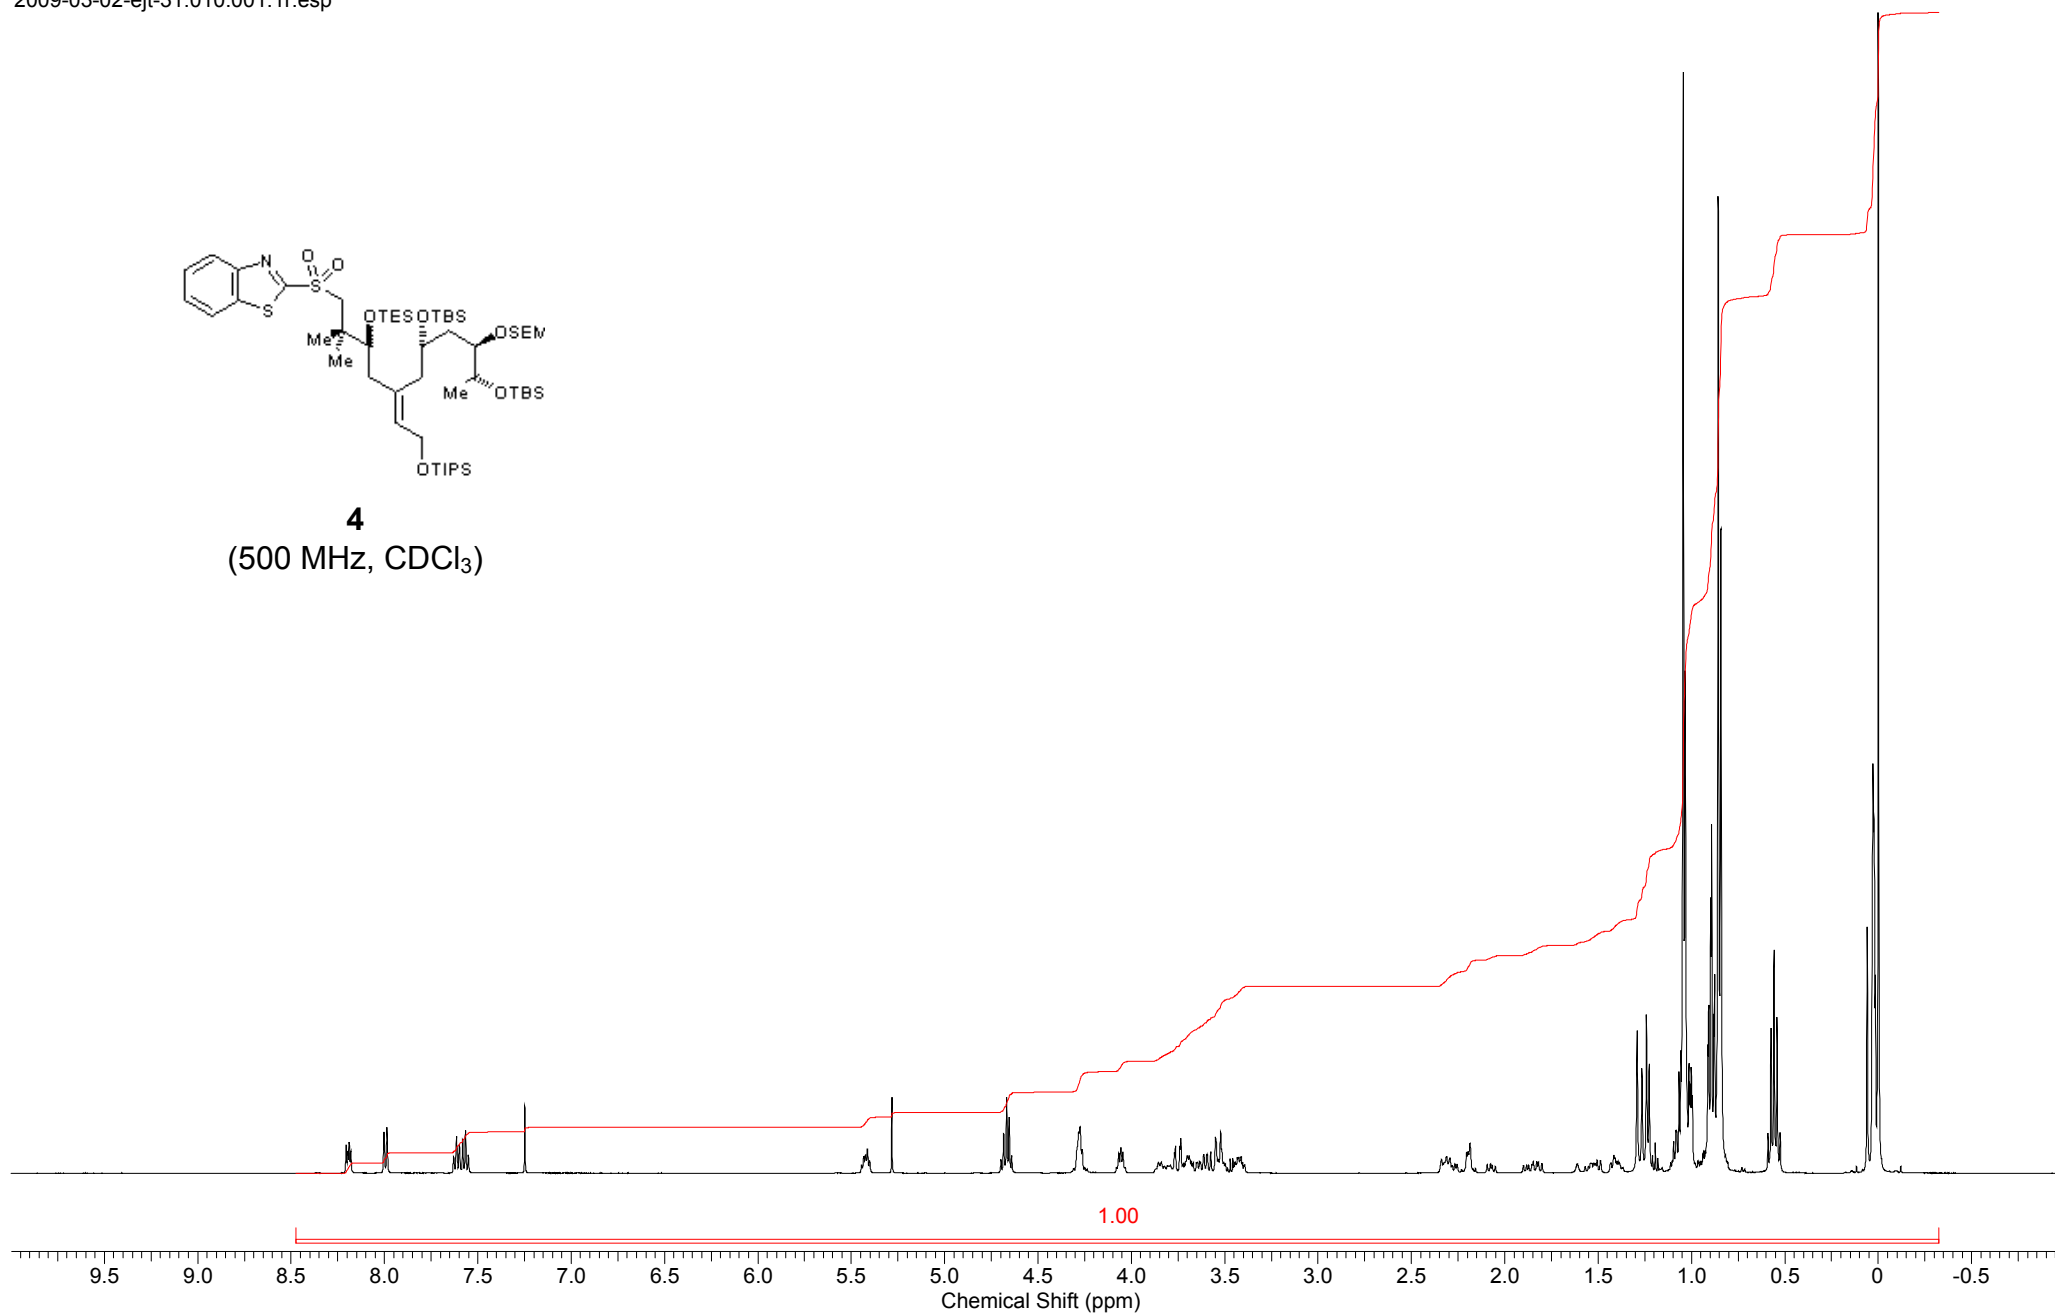

This report was created by ACD/NMR Processor Academic Edition. For more information go to [www.acdlabs.com/nmrproc/](http://www.acdlabs.com/nmrproc/)

Compound 4 mCARBON CDCl3 /opt/bruk500data/2009/Mar ejt 31

2009-03-02-ejt-31.020.001.1r.esp

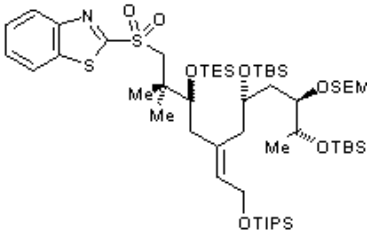

4

(125 MHz, CDCl<sub>3</sub>)

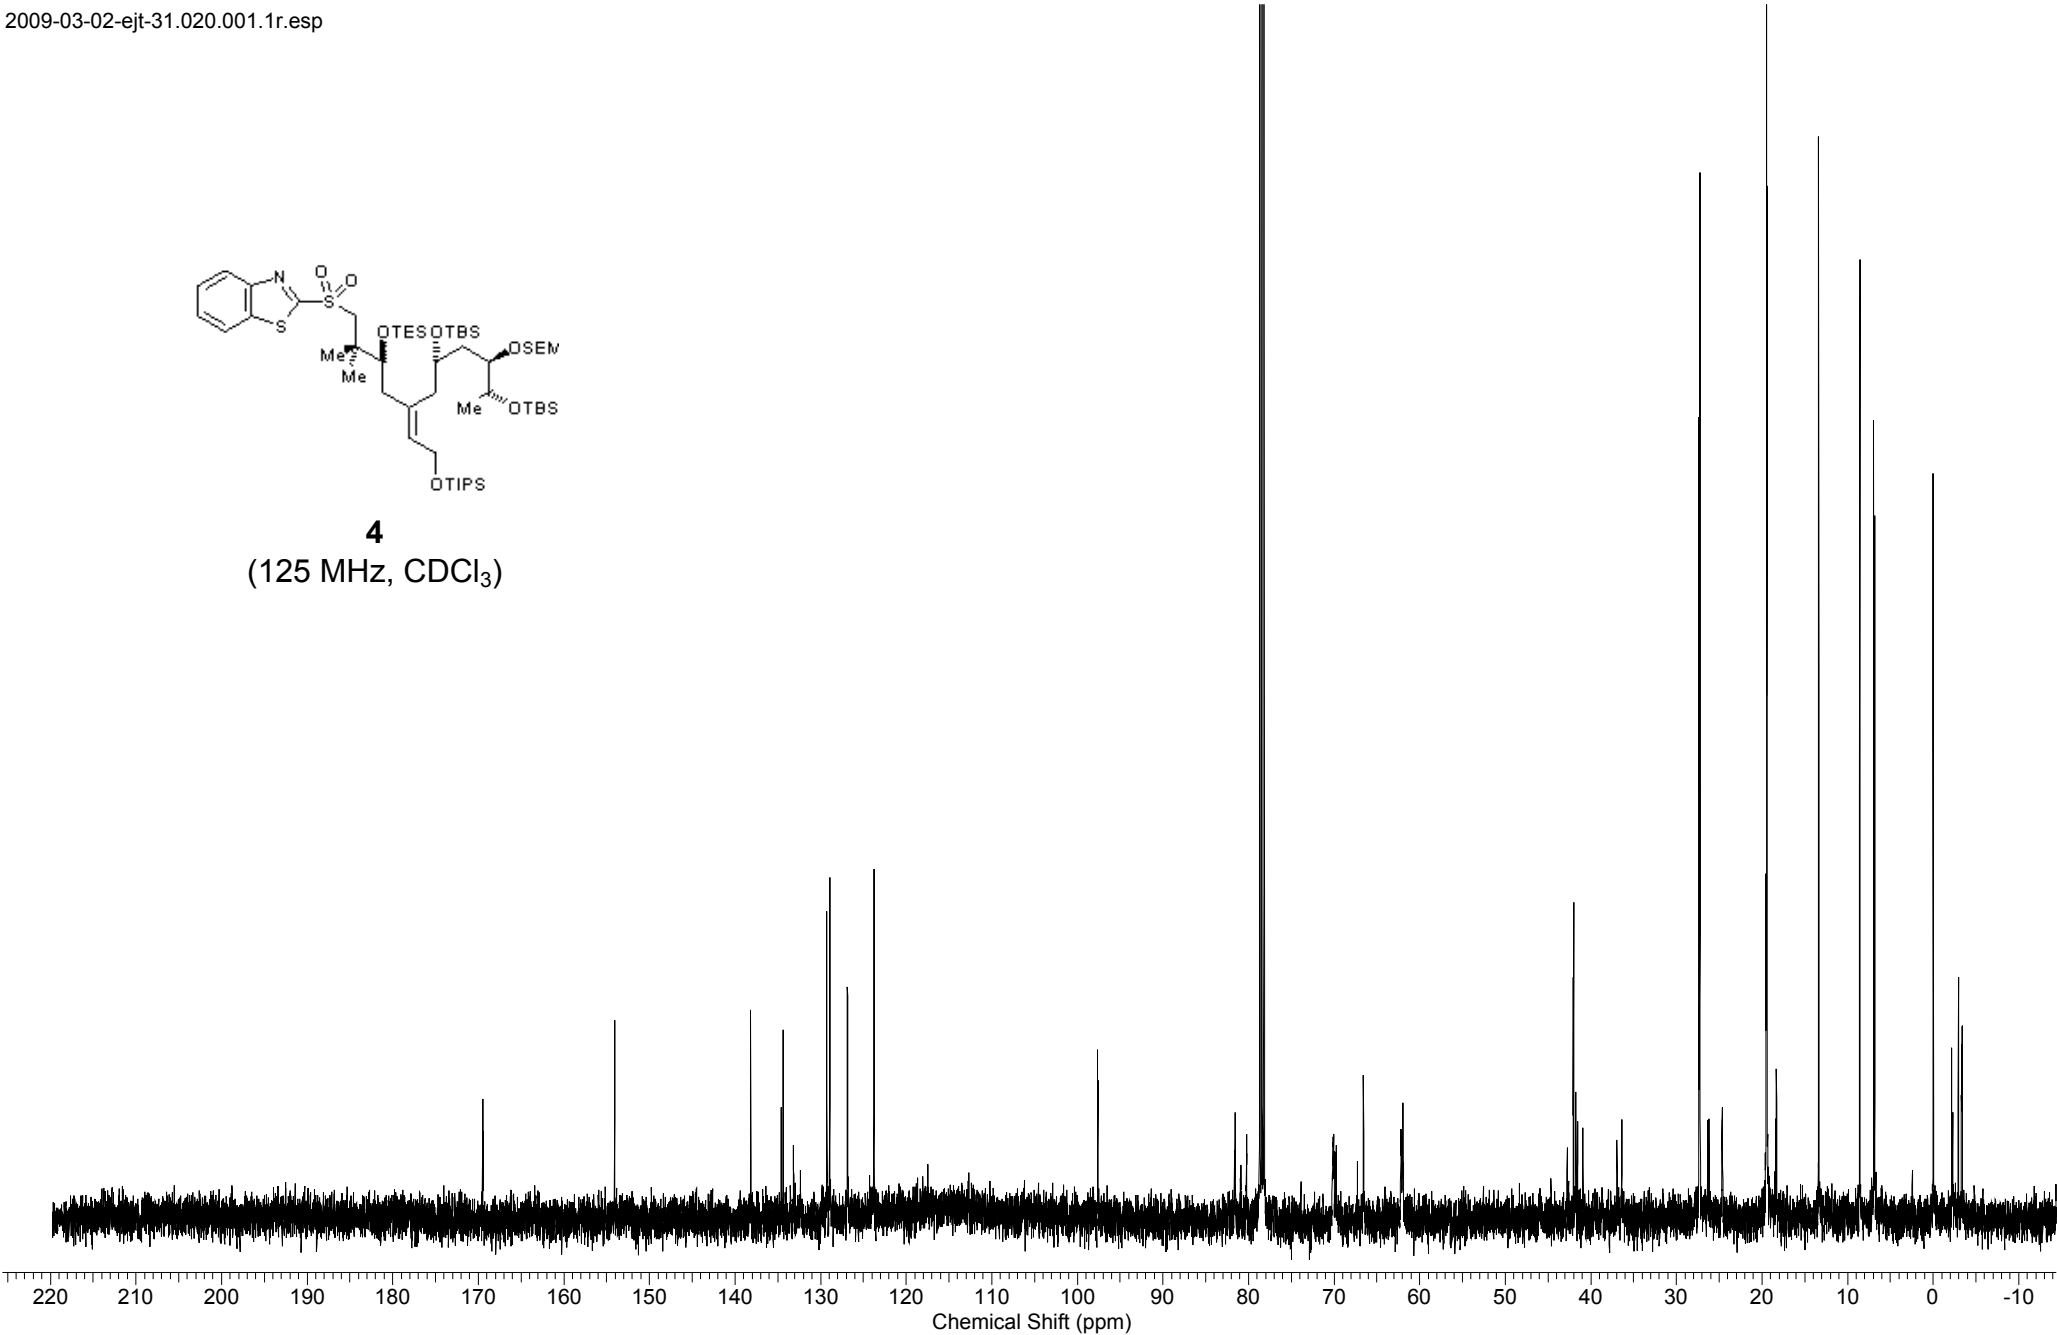

This report was created by ACD/NMR Processor Academic Edition. For more information go to [www.acdlabs.com/nmrproc/](http://www.acdlabs.com/nmrproc/)

Compound 28 mPROTON C6D6 /opt/bruk500data/2009/Jul ejt 21

2009-07-14-ejt-21.010.001.1r.esp

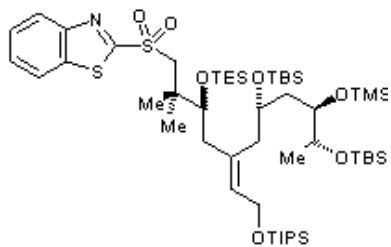

**29**  
(500 MHz, C<sub>6</sub>D<sub>6</sub>)

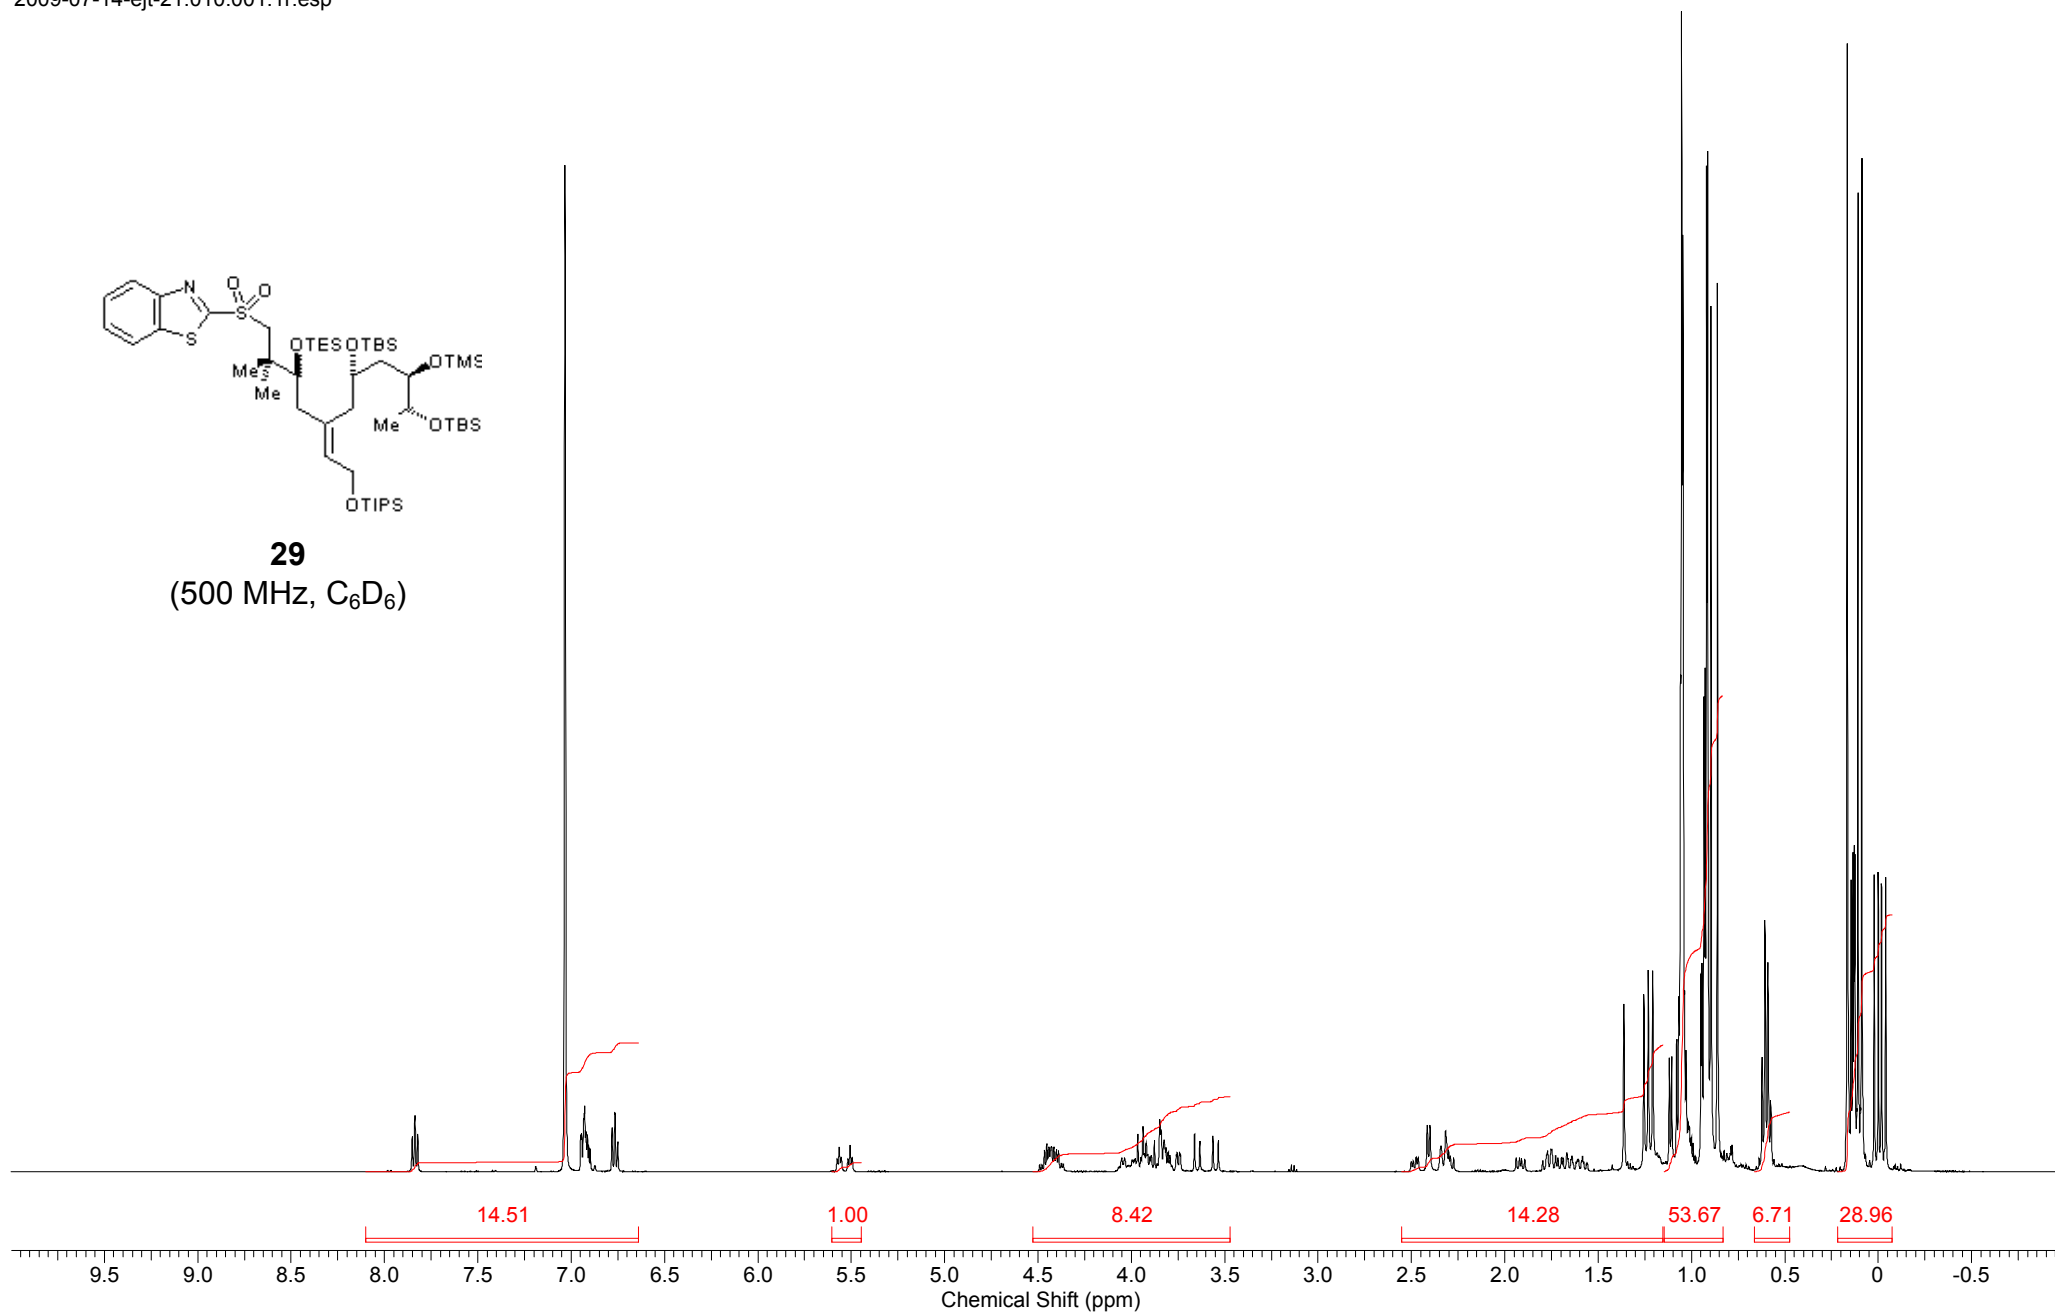



2010-03-17-ejt-8.020.001.1r.esp

Compound 28 mCARBONnight C6D6 {e:\bruk400data\2010\Mar} ejt 8

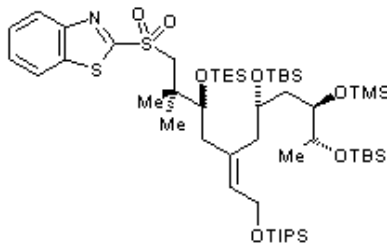

**29**  
(100 MHz, C<sub>6</sub>D<sub>6</sub>)

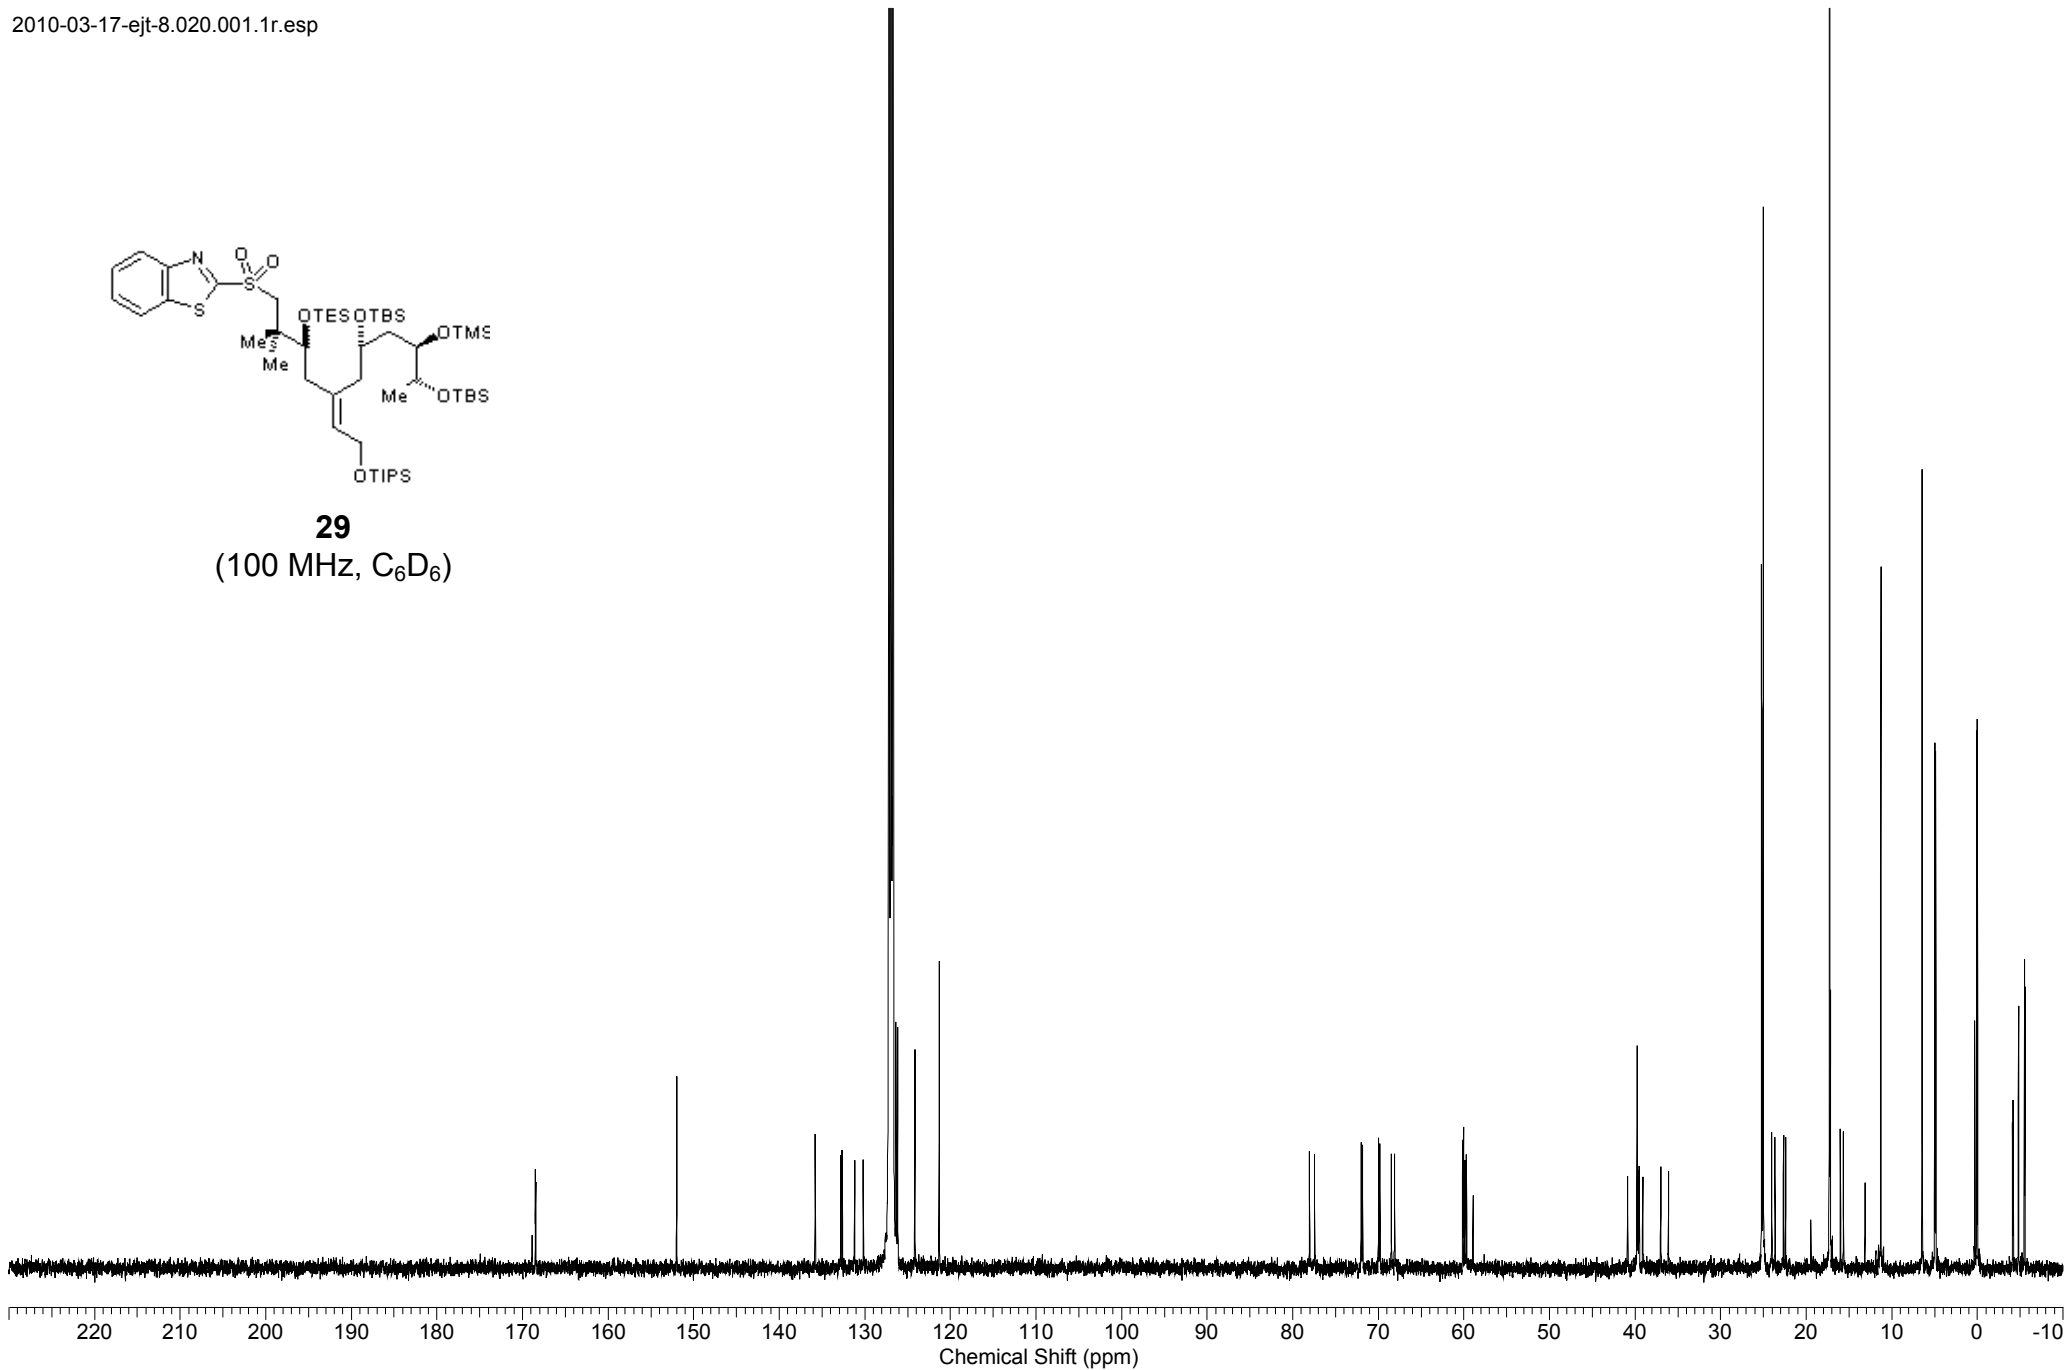

This report was created by ACD/NMR Processor Academic Edition. For more information go to [www.acdlabs.com/nmrproc/](http://www.acdlabs.com/nmrproc/)

Compound 32 mPROTON C6D6 /opt/bruk500data/2010/Apr ejt 5

2010-04-11-ejt-5.010.001.1r.esp

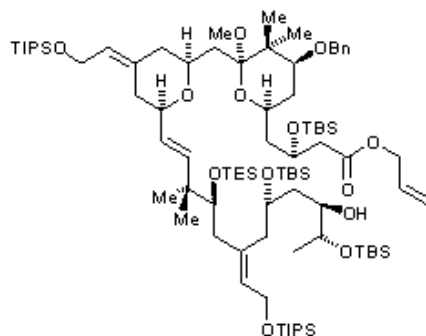

**32**  
(500 MHz, C<sub>6</sub>D<sub>6</sub>)

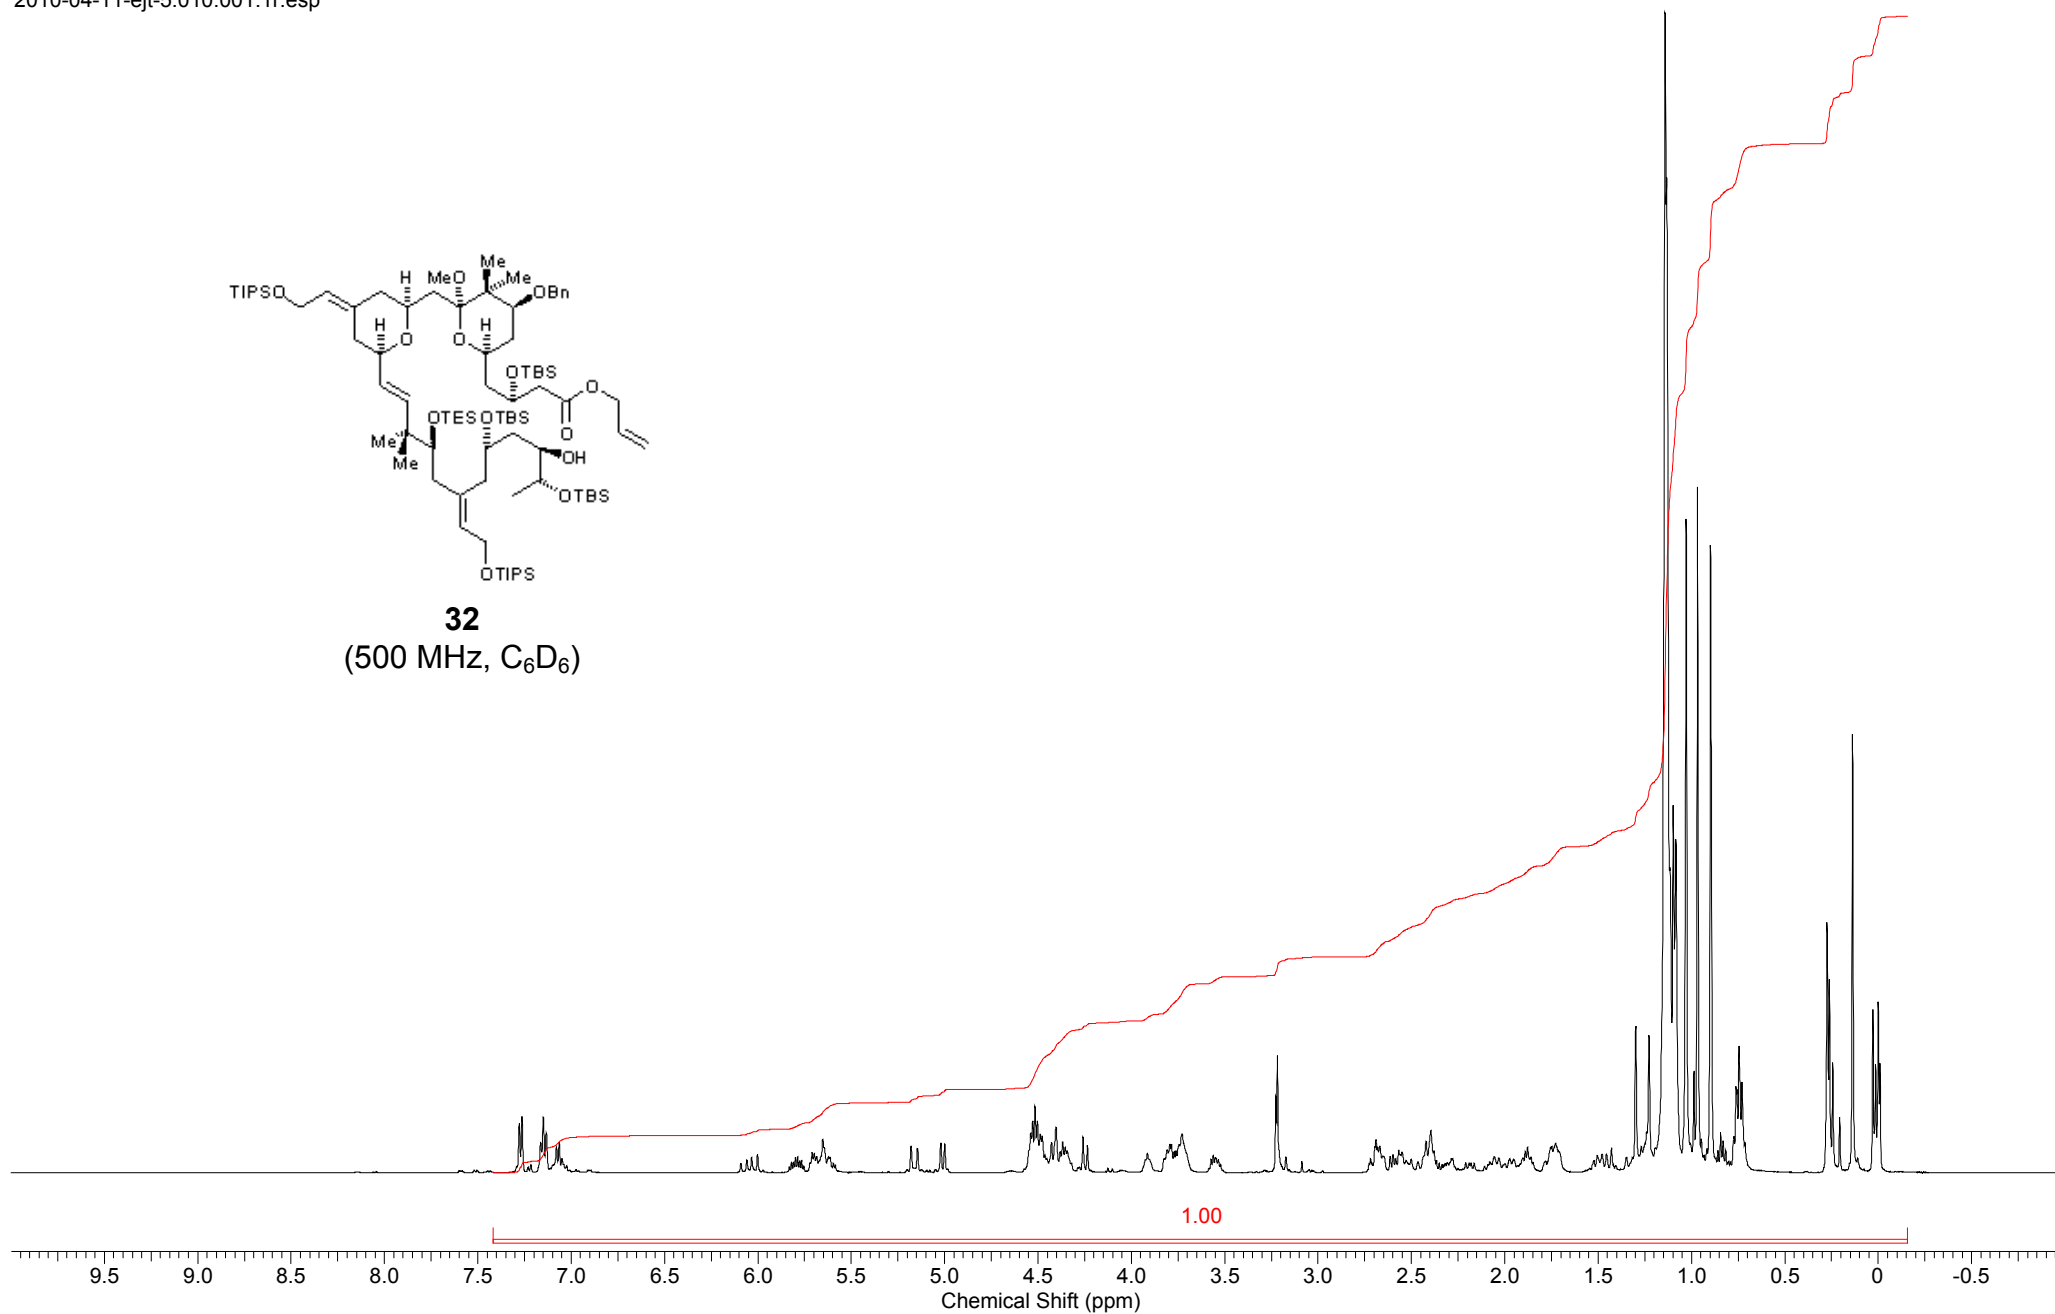

This report was created by ACD/NMR Processor Academic Edition. For more information go to [www.acdlabs.com/nmrproc/](http://www.acdlabs.com/nmrproc/)

Compound 32 mCARBONnight C6D6 {e:\bruk400data\2010\Apr} ejt 2

2010-04-09-ejt-2.010.001.1r.esp

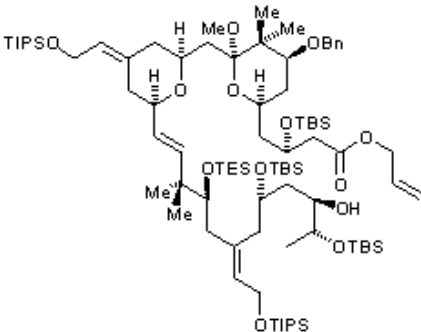

**32**  
(100 MHz, C<sub>6</sub>D<sub>6</sub>)

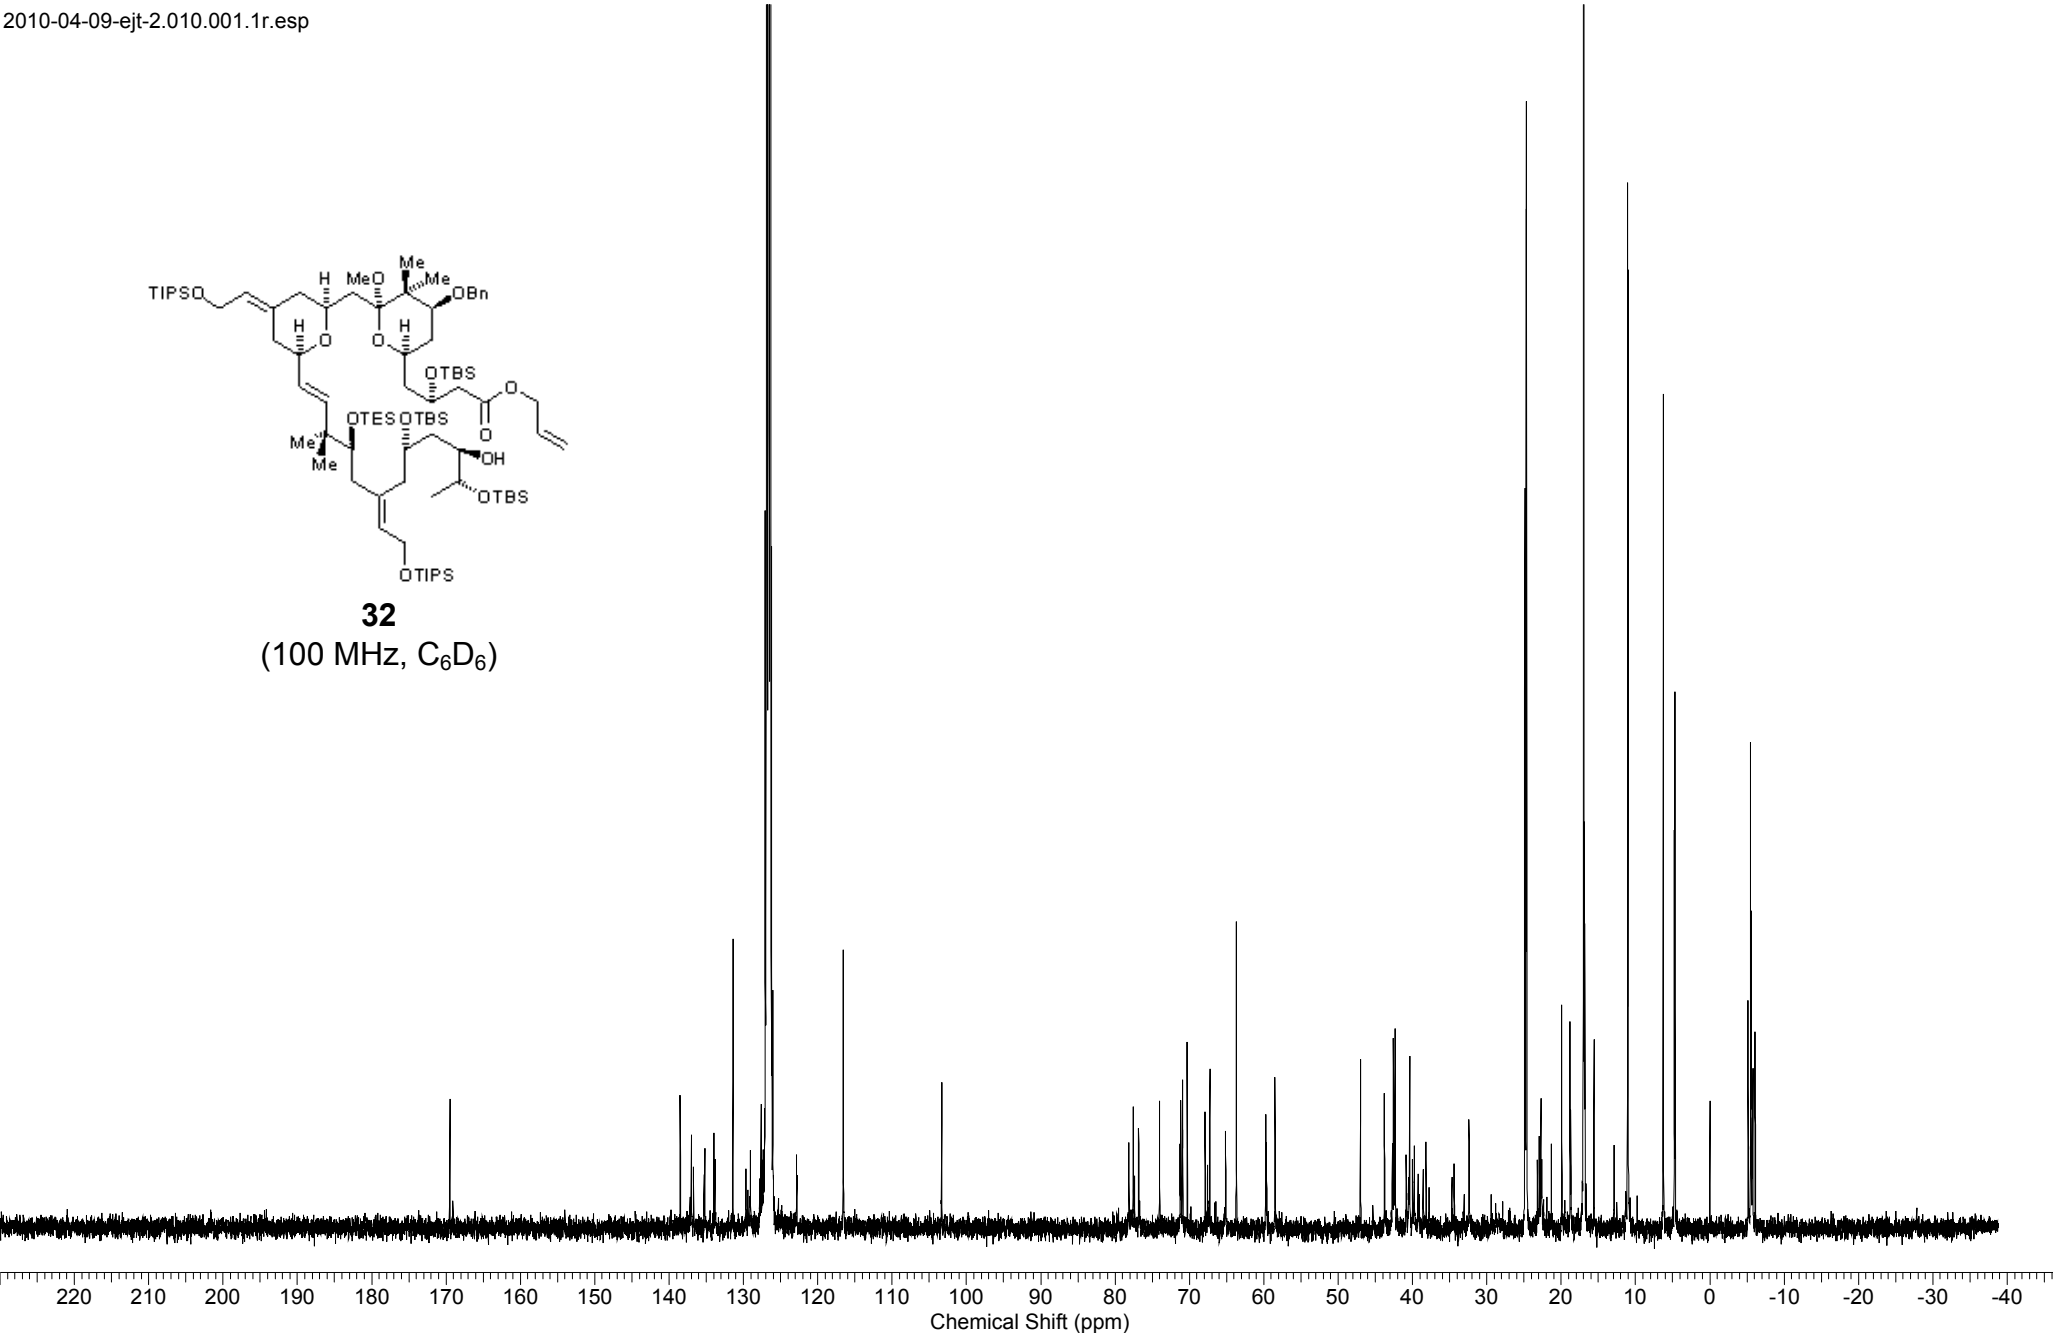

This report was created by ACD/NMR Processor Academic Edition. For more information go to [www.acdlabs.com/nmrproc/](http://www.acdlabs.com/nmrproc/)

Compound 34 mPROTON C6D6 /opt/bruk500data/2009/Aug ejt 11

2009-08-07-ejt-11.010.001.1r.esp

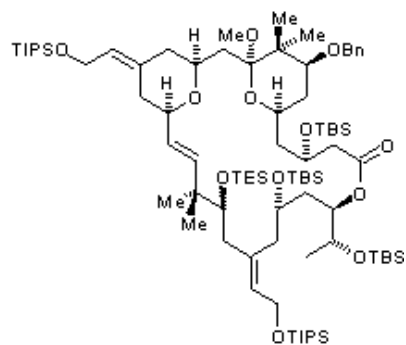

**34**  
(500 MHz, C<sub>6</sub>D<sub>6</sub>)

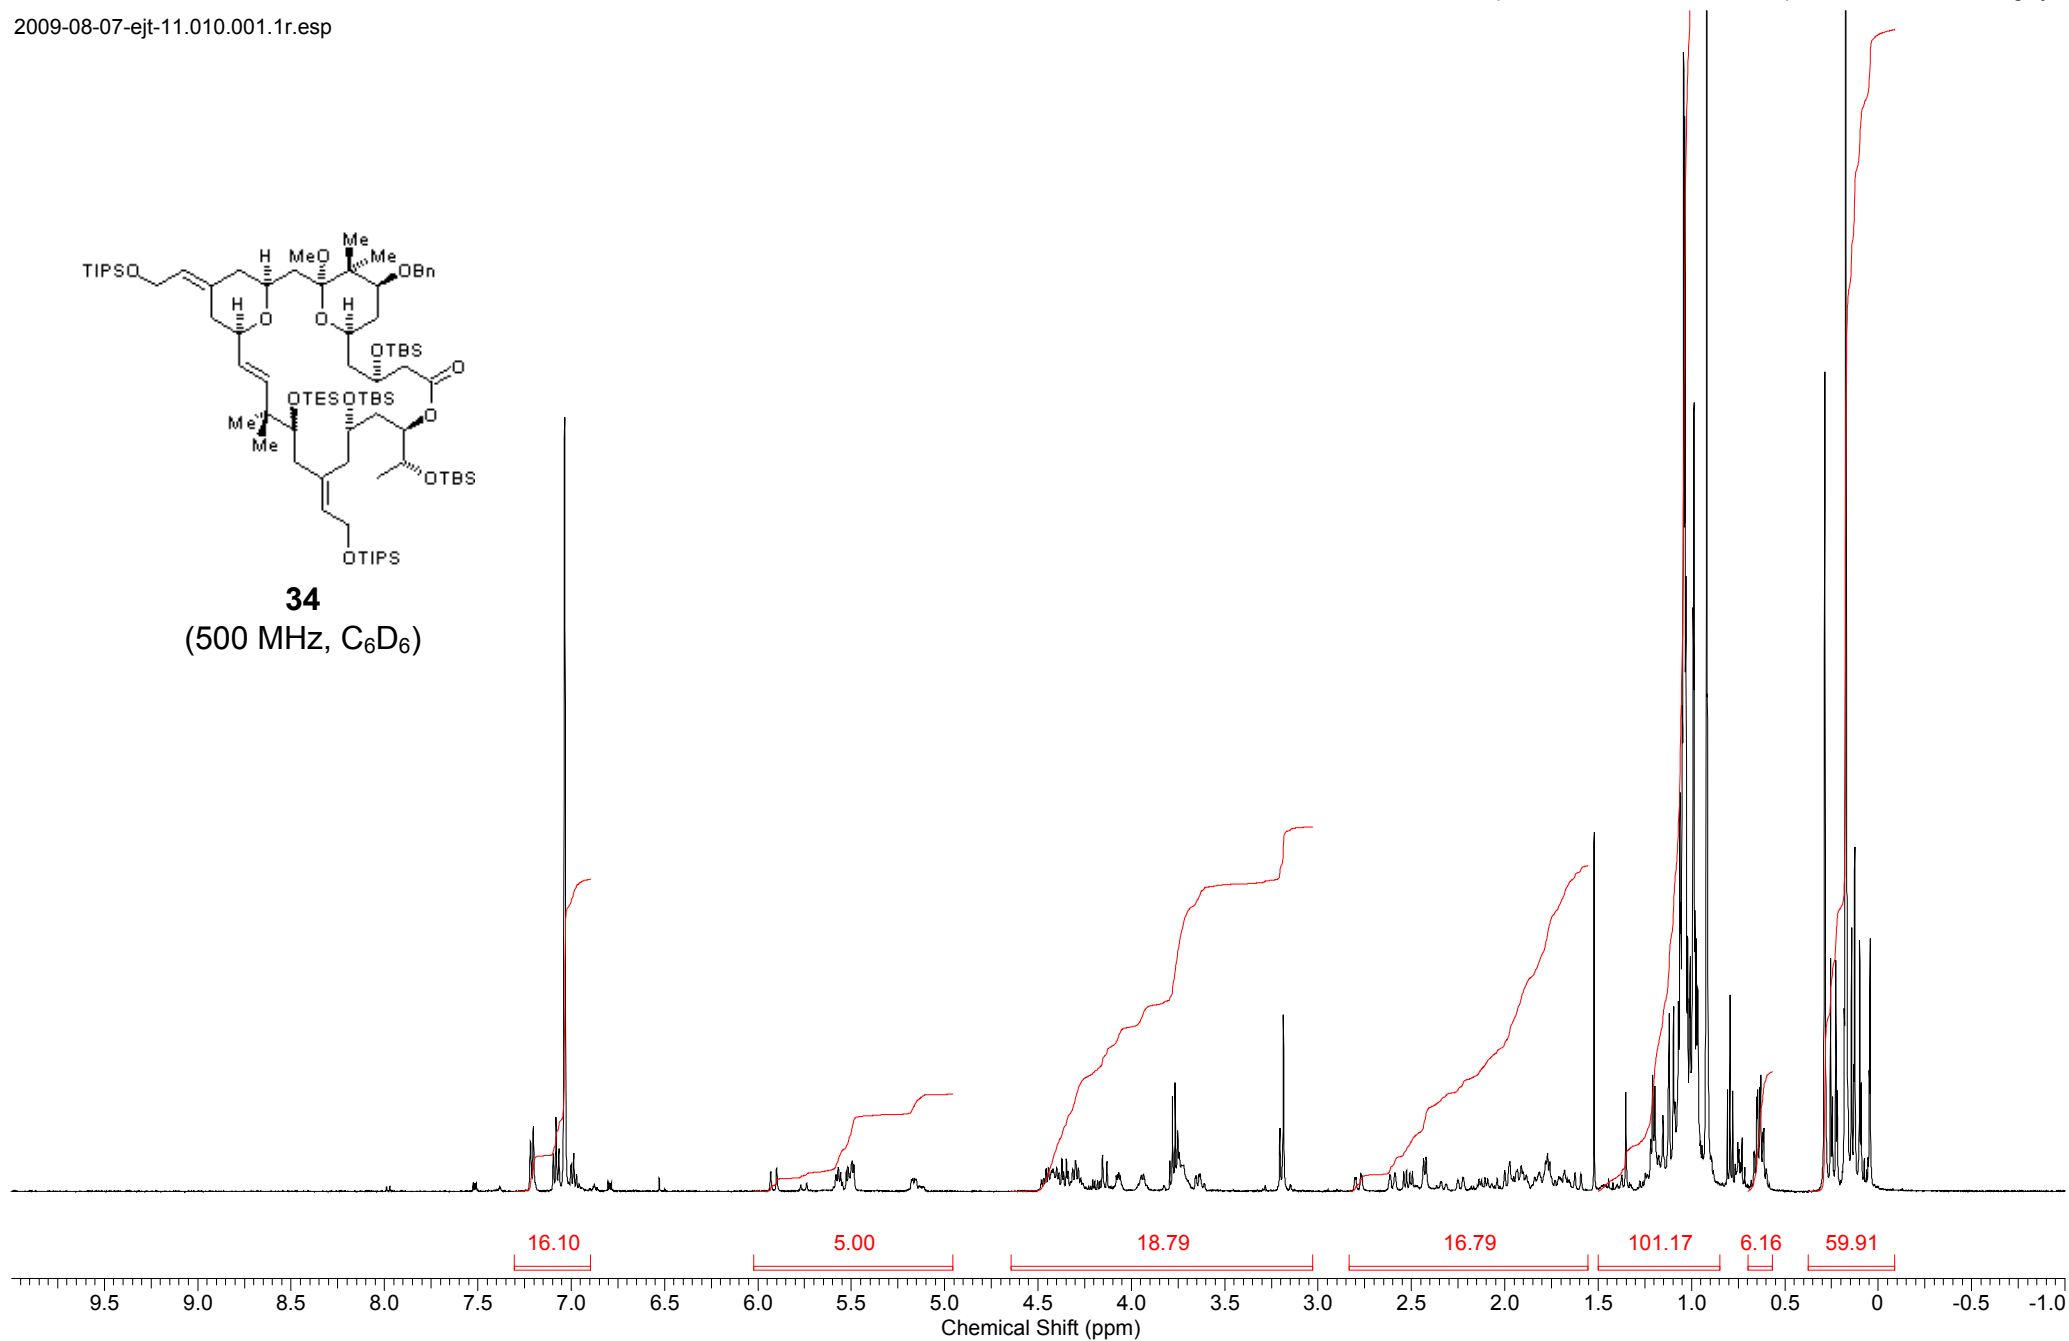

This report was created by ACD/NMR Processor Academic Edition. For more information go to [www.acdlabs.com/nmrproc/](http://www.acdlabs.com/nmrproc/)

Compound 34 mCARBONnight C6D6 {e:\bruk400data\2010\Apr} ejt 25

2010-04-25-ejt-25.011.001.1r.esp

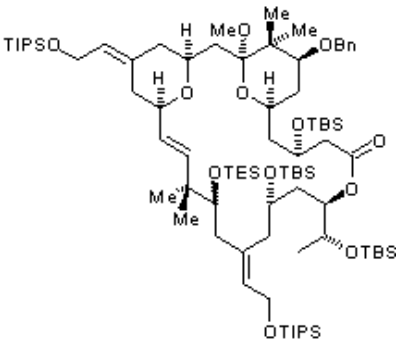

**34**  
(100 MHz, C<sub>6</sub>D<sub>6</sub>)

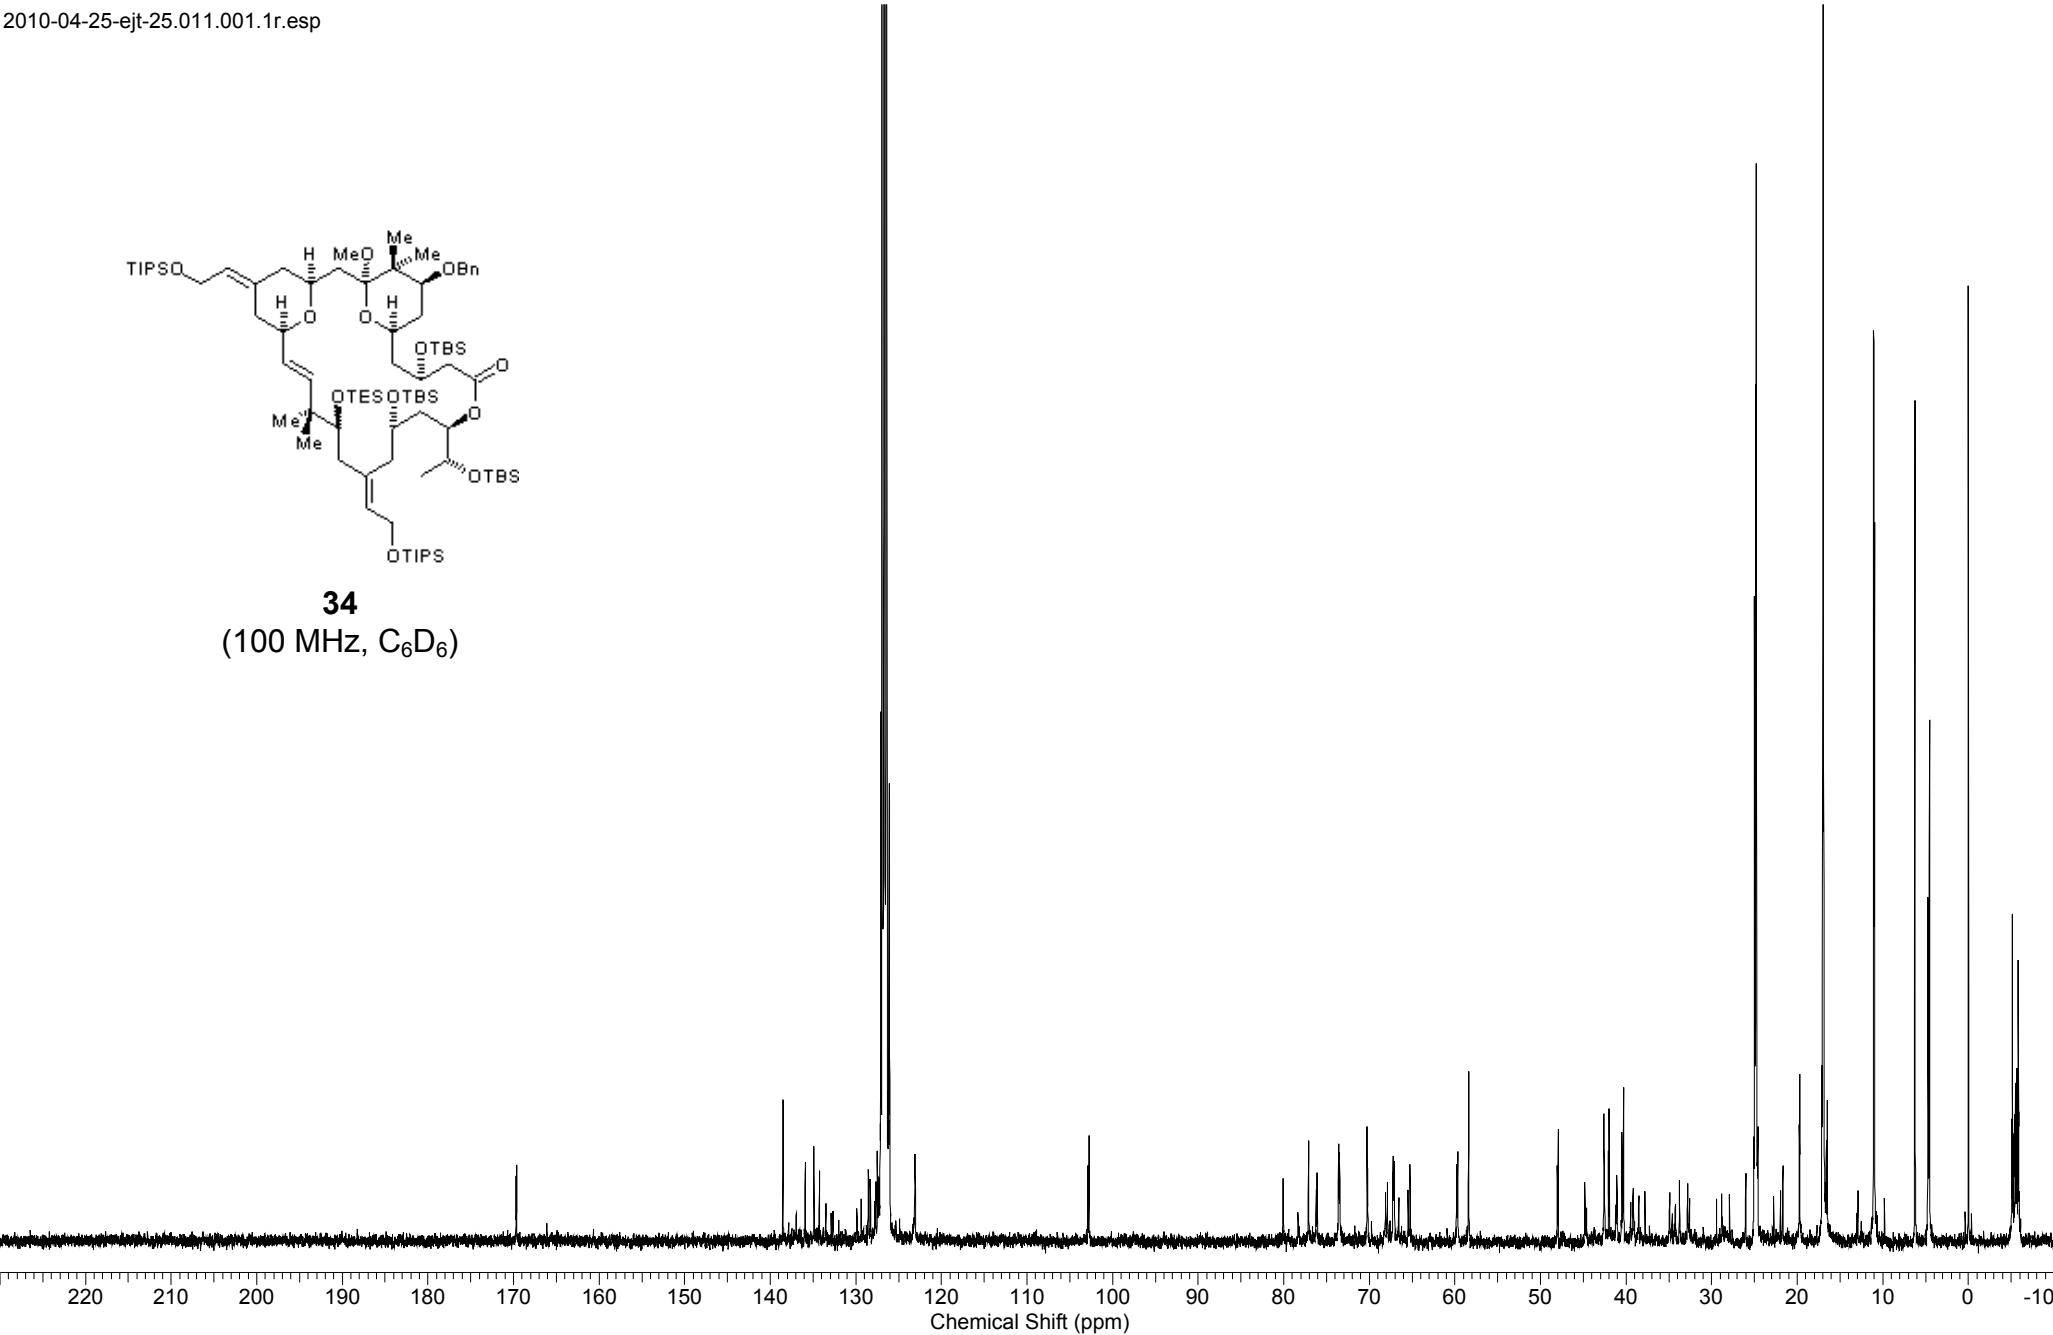

This report was created by ACD/NMR Processor Academic Edition. For more information go to [www.acdlabs.com/nmrproc/](http://www.acdlabs.com/nmrproc/)

Compound 36 mPROTON C6D6 {e:\bruk400data\2010\May} ejt 9

2010-05-30-ejt-9.010.001.1r.esp

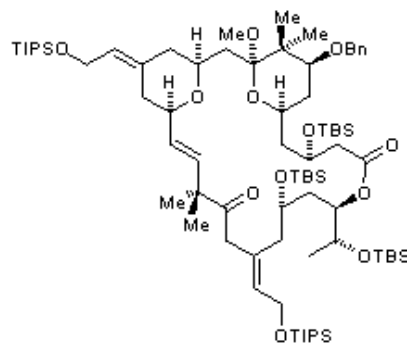

**36**  
(400 MHz, C<sub>6</sub>D<sub>6</sub>)

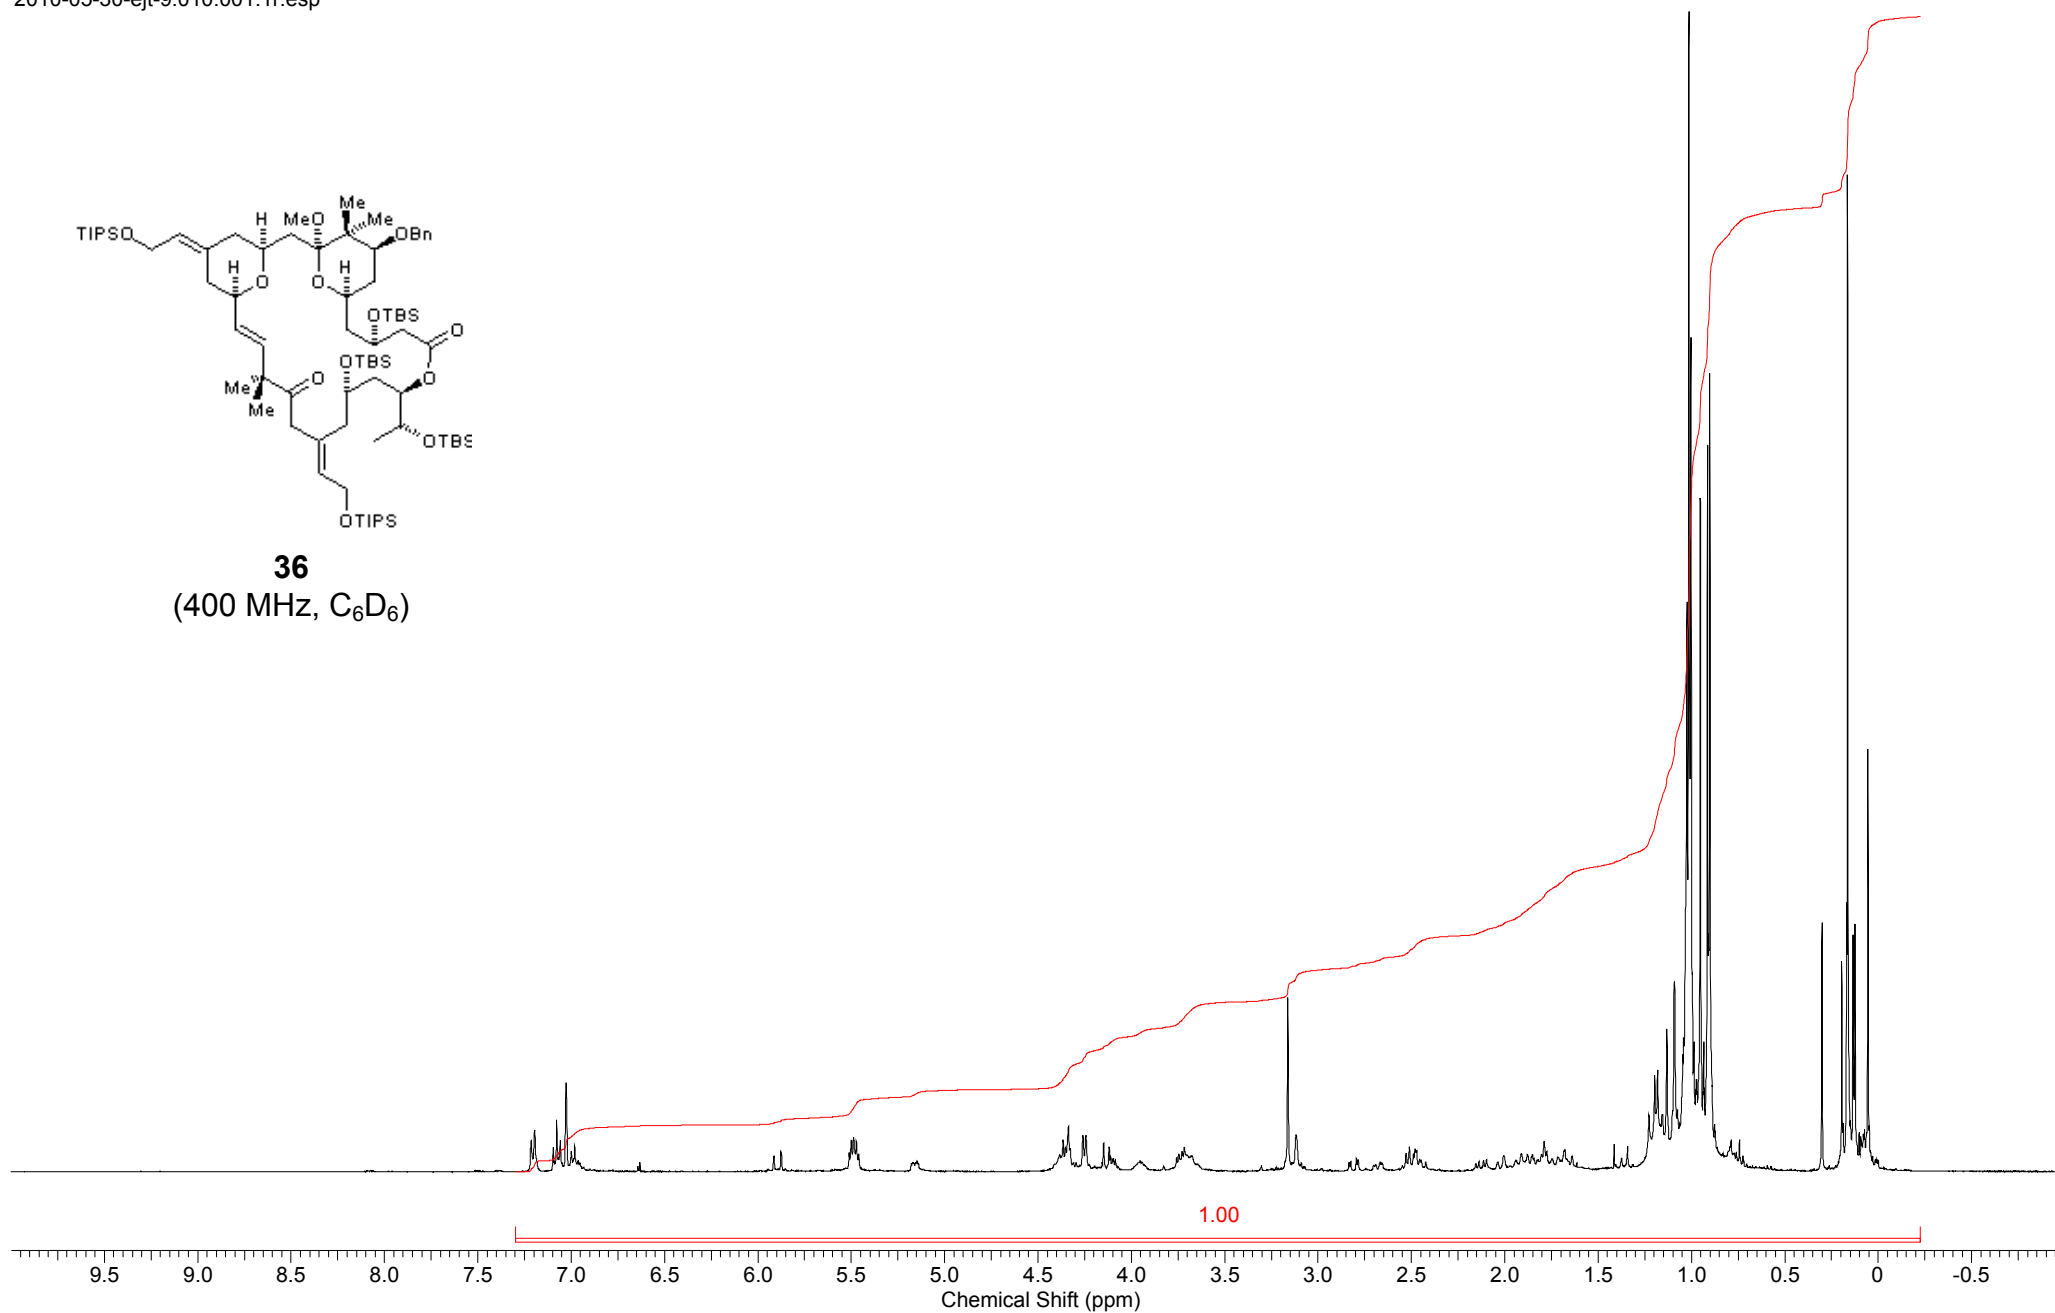

This report was created by ACD/NMR Processor Academic Edition. For more information go to [www.acdlabs.com/nmrproc/](http://www.acdlabs.com/nmrproc/)

Compound 36 mCARBON C6D6 {E:\bruk400service\_data\2010\Jun} Administrator 37

2010-06-02-Administrator-37.011.001.1r.esp

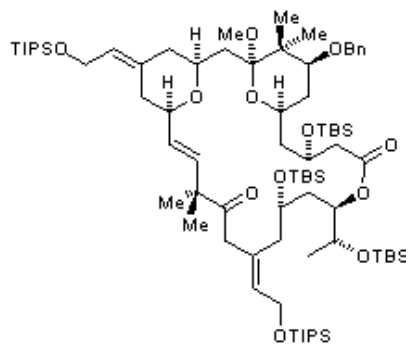

**36**  
(100 MHz, C<sub>6</sub>D<sub>6</sub>)

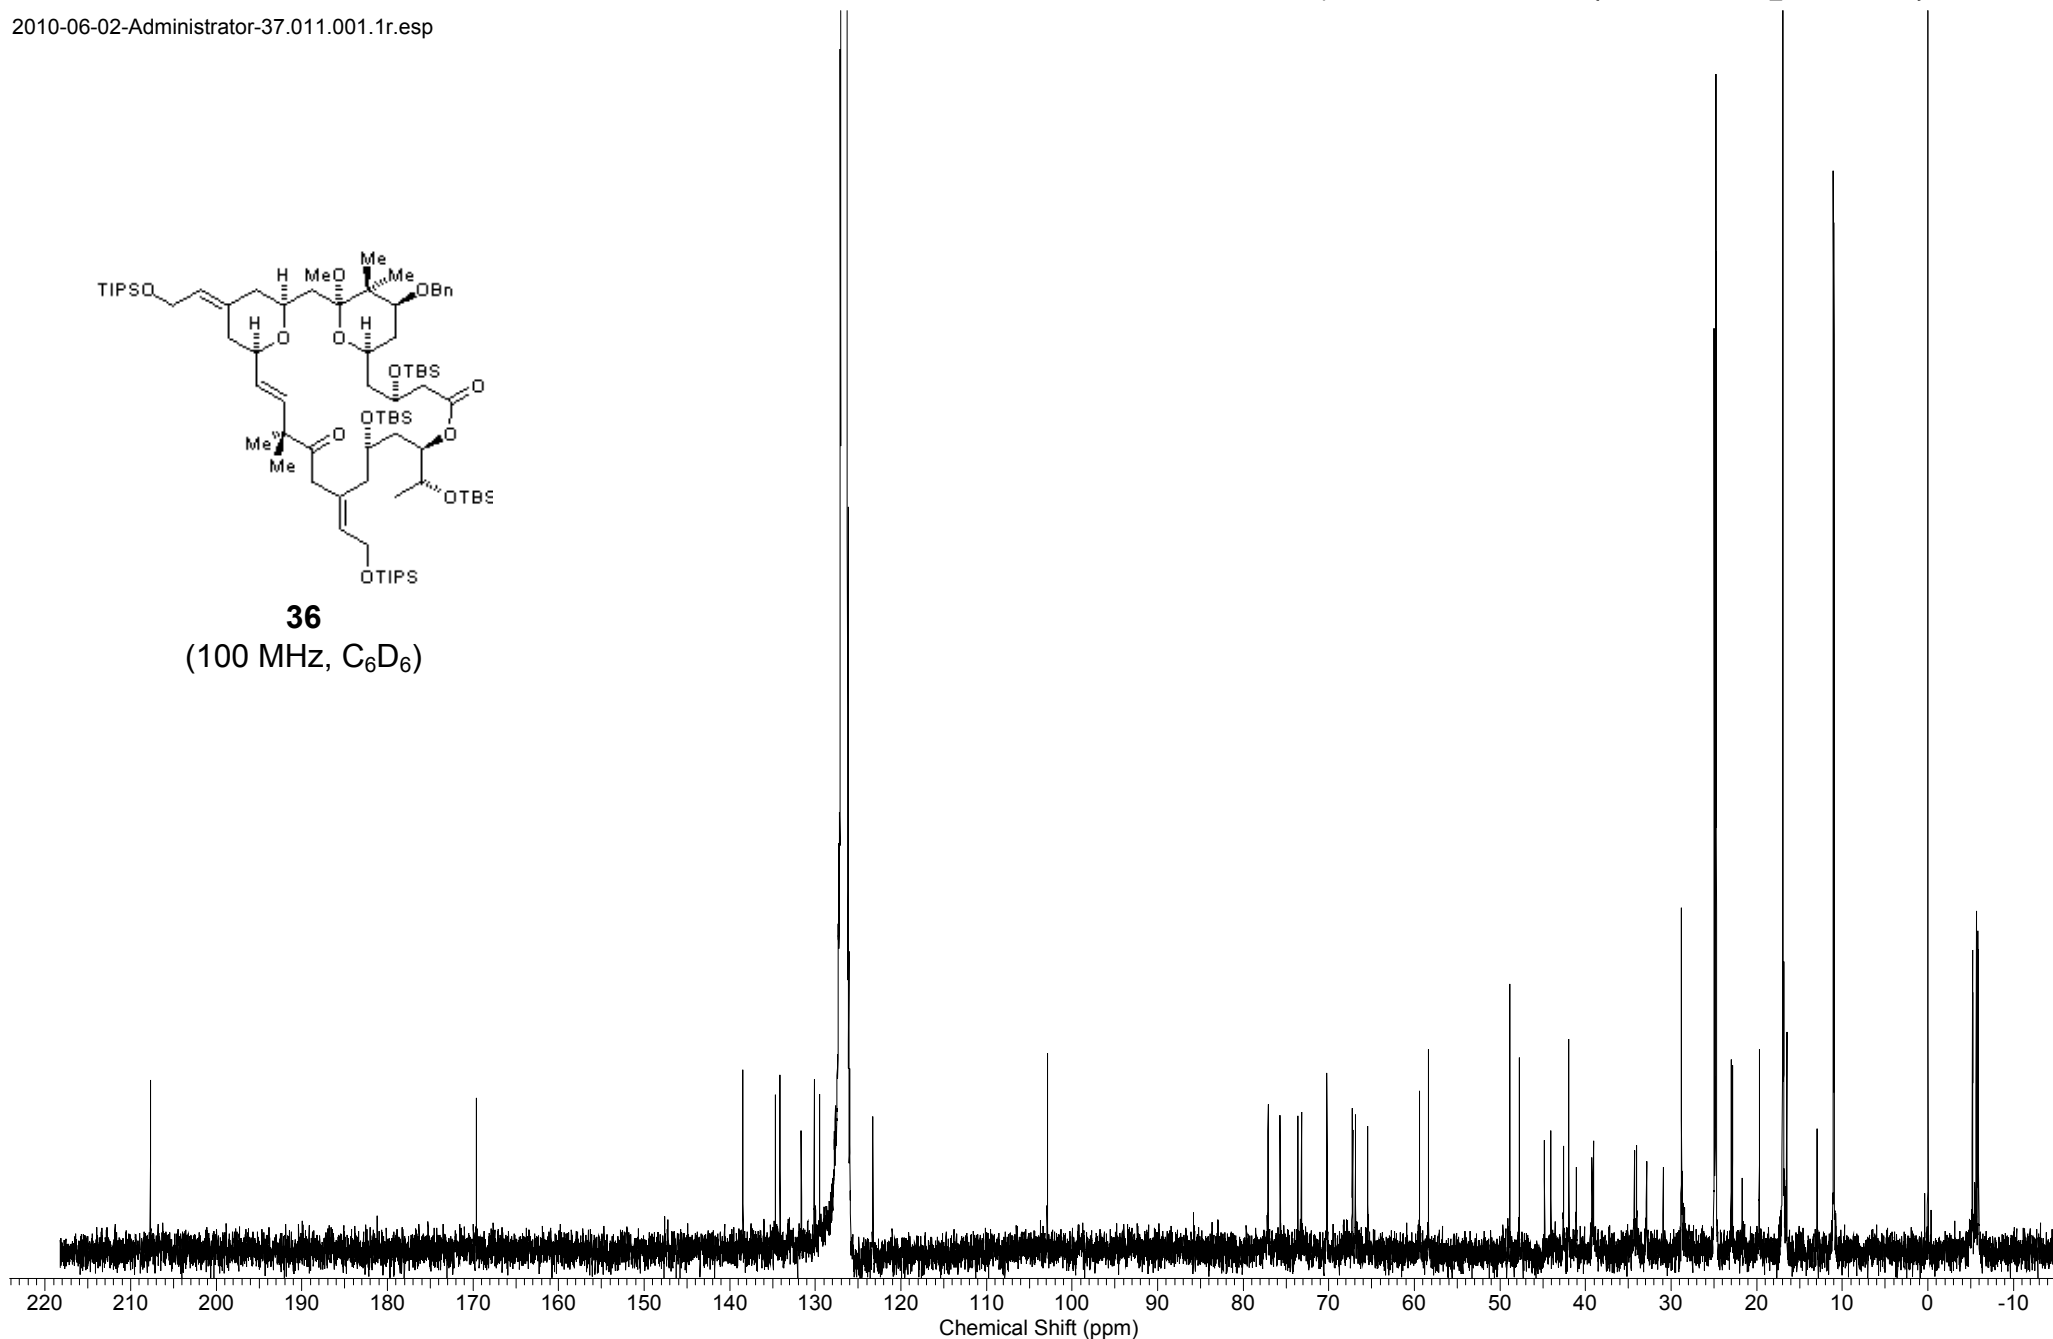

This report was created by ACD/NMR Processor Academic Edition. For more information go to [www.acdlabs.com/nmrproc/](http://www.acdlabs.com/nmrproc/)

Compound 41 mPROTON C6D6 {e:\bruk400data\2010\Jul} ejt 18

2010-07-28-ejt-18.010.001.1r.esp

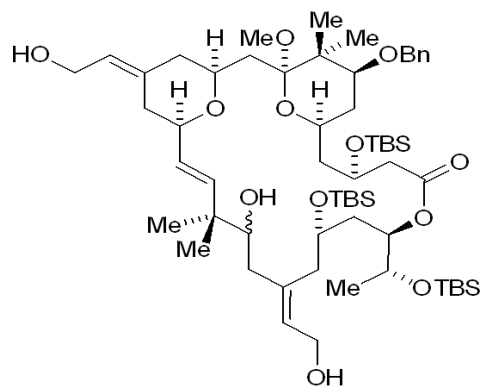

**37**  
(400 MHz, C<sub>6</sub>D<sub>6</sub>)

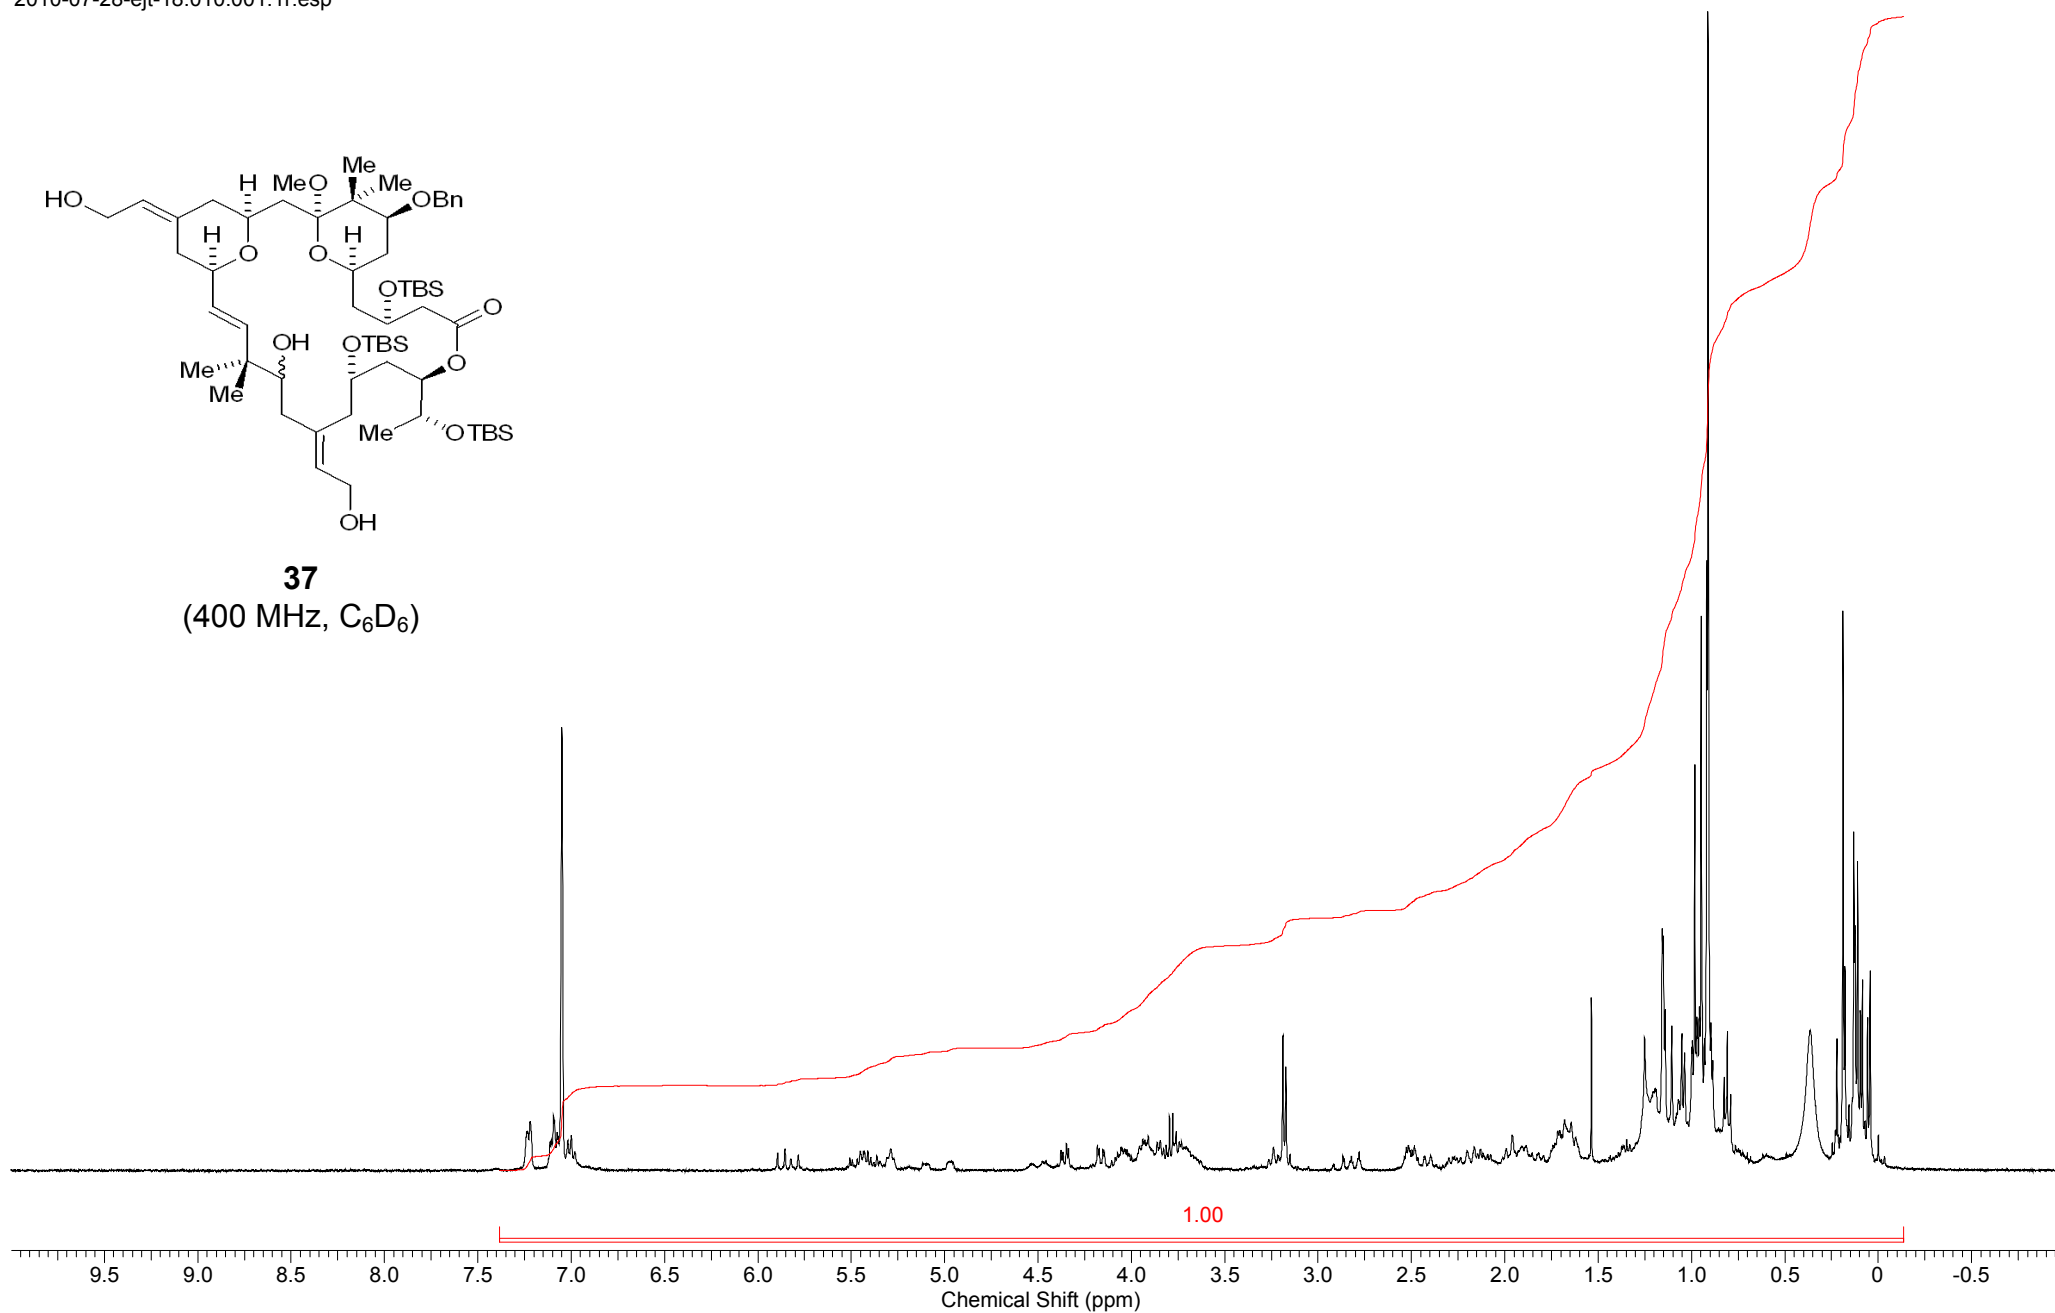



2011-01-30-ejt-49.010.001.1r.esp

Compound 37 mCARBONnight C6D6 {e:\bruk400data\2011\Jan} ejt 49

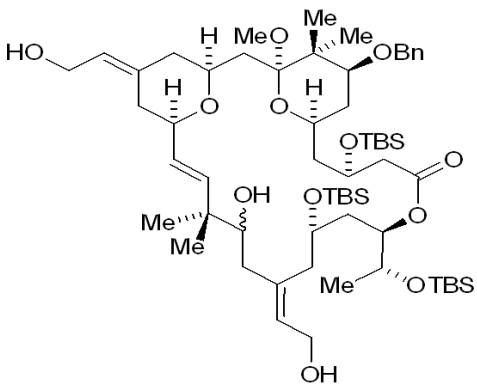

**37**  
(100 MHz, C<sub>6</sub>D<sub>6</sub>)

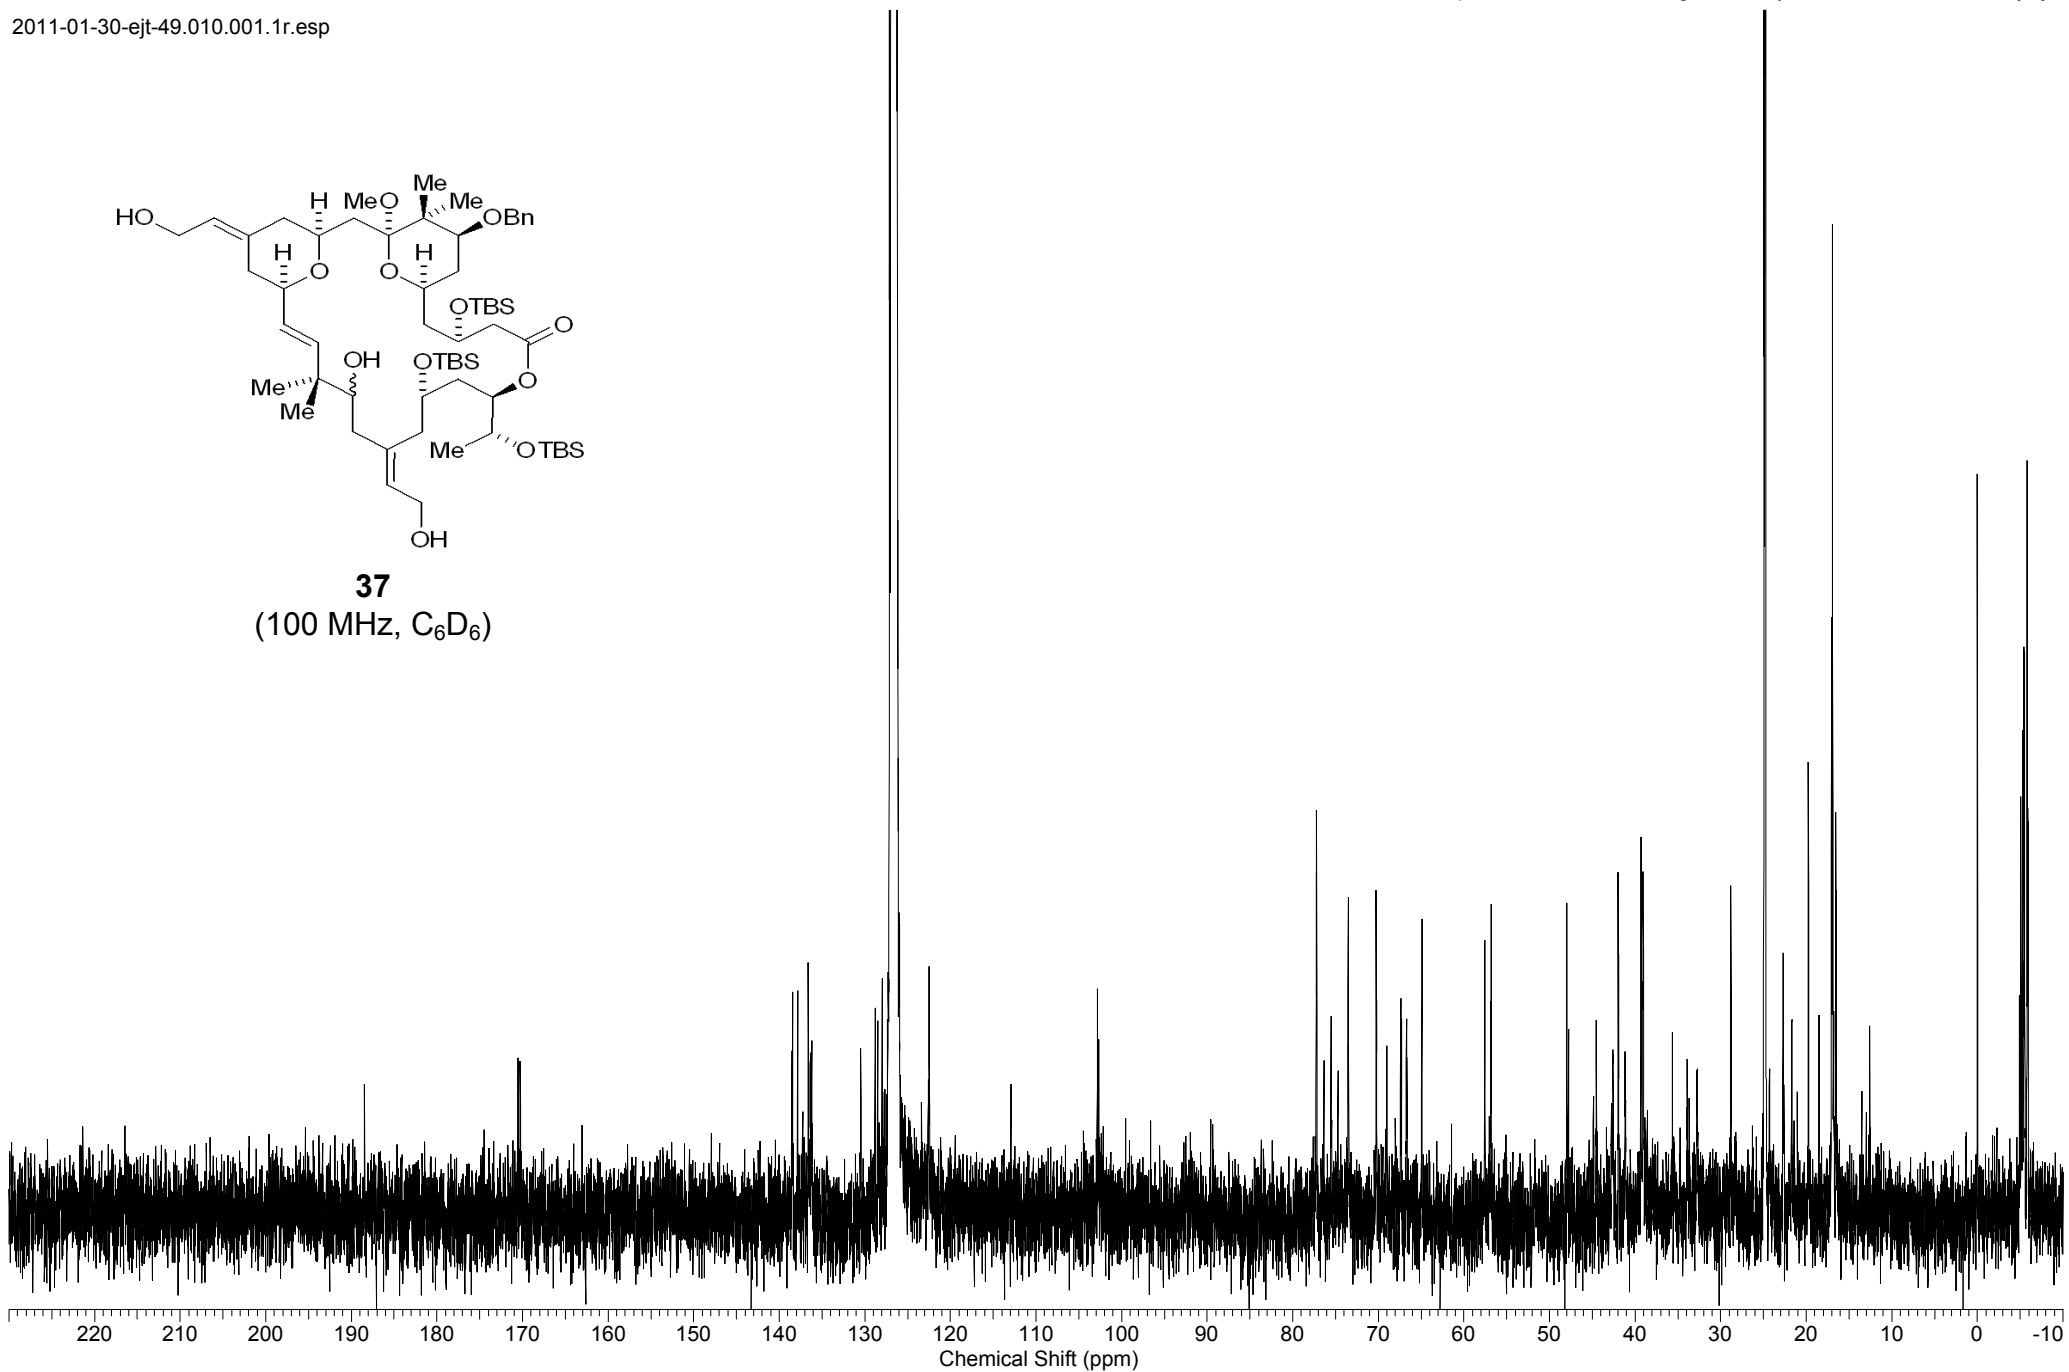

This report was created by ACD/NMR Processor Academic Edition. For more information go to [www.acdlabs.com/nmrproc/](http://www.acdlabs.com/nmrproc/)

Compound 42 mPROTON C6D6 {e:\bruk400data\2011\Feb} ejt 46

2011-02-09-ejt-46.010.001.1r.esp

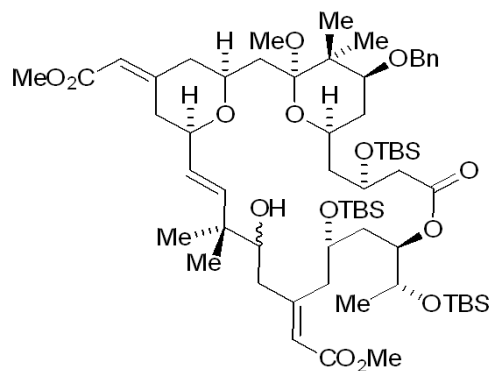

**38**  
(400 MHz, C<sub>6</sub>D<sub>6</sub>)

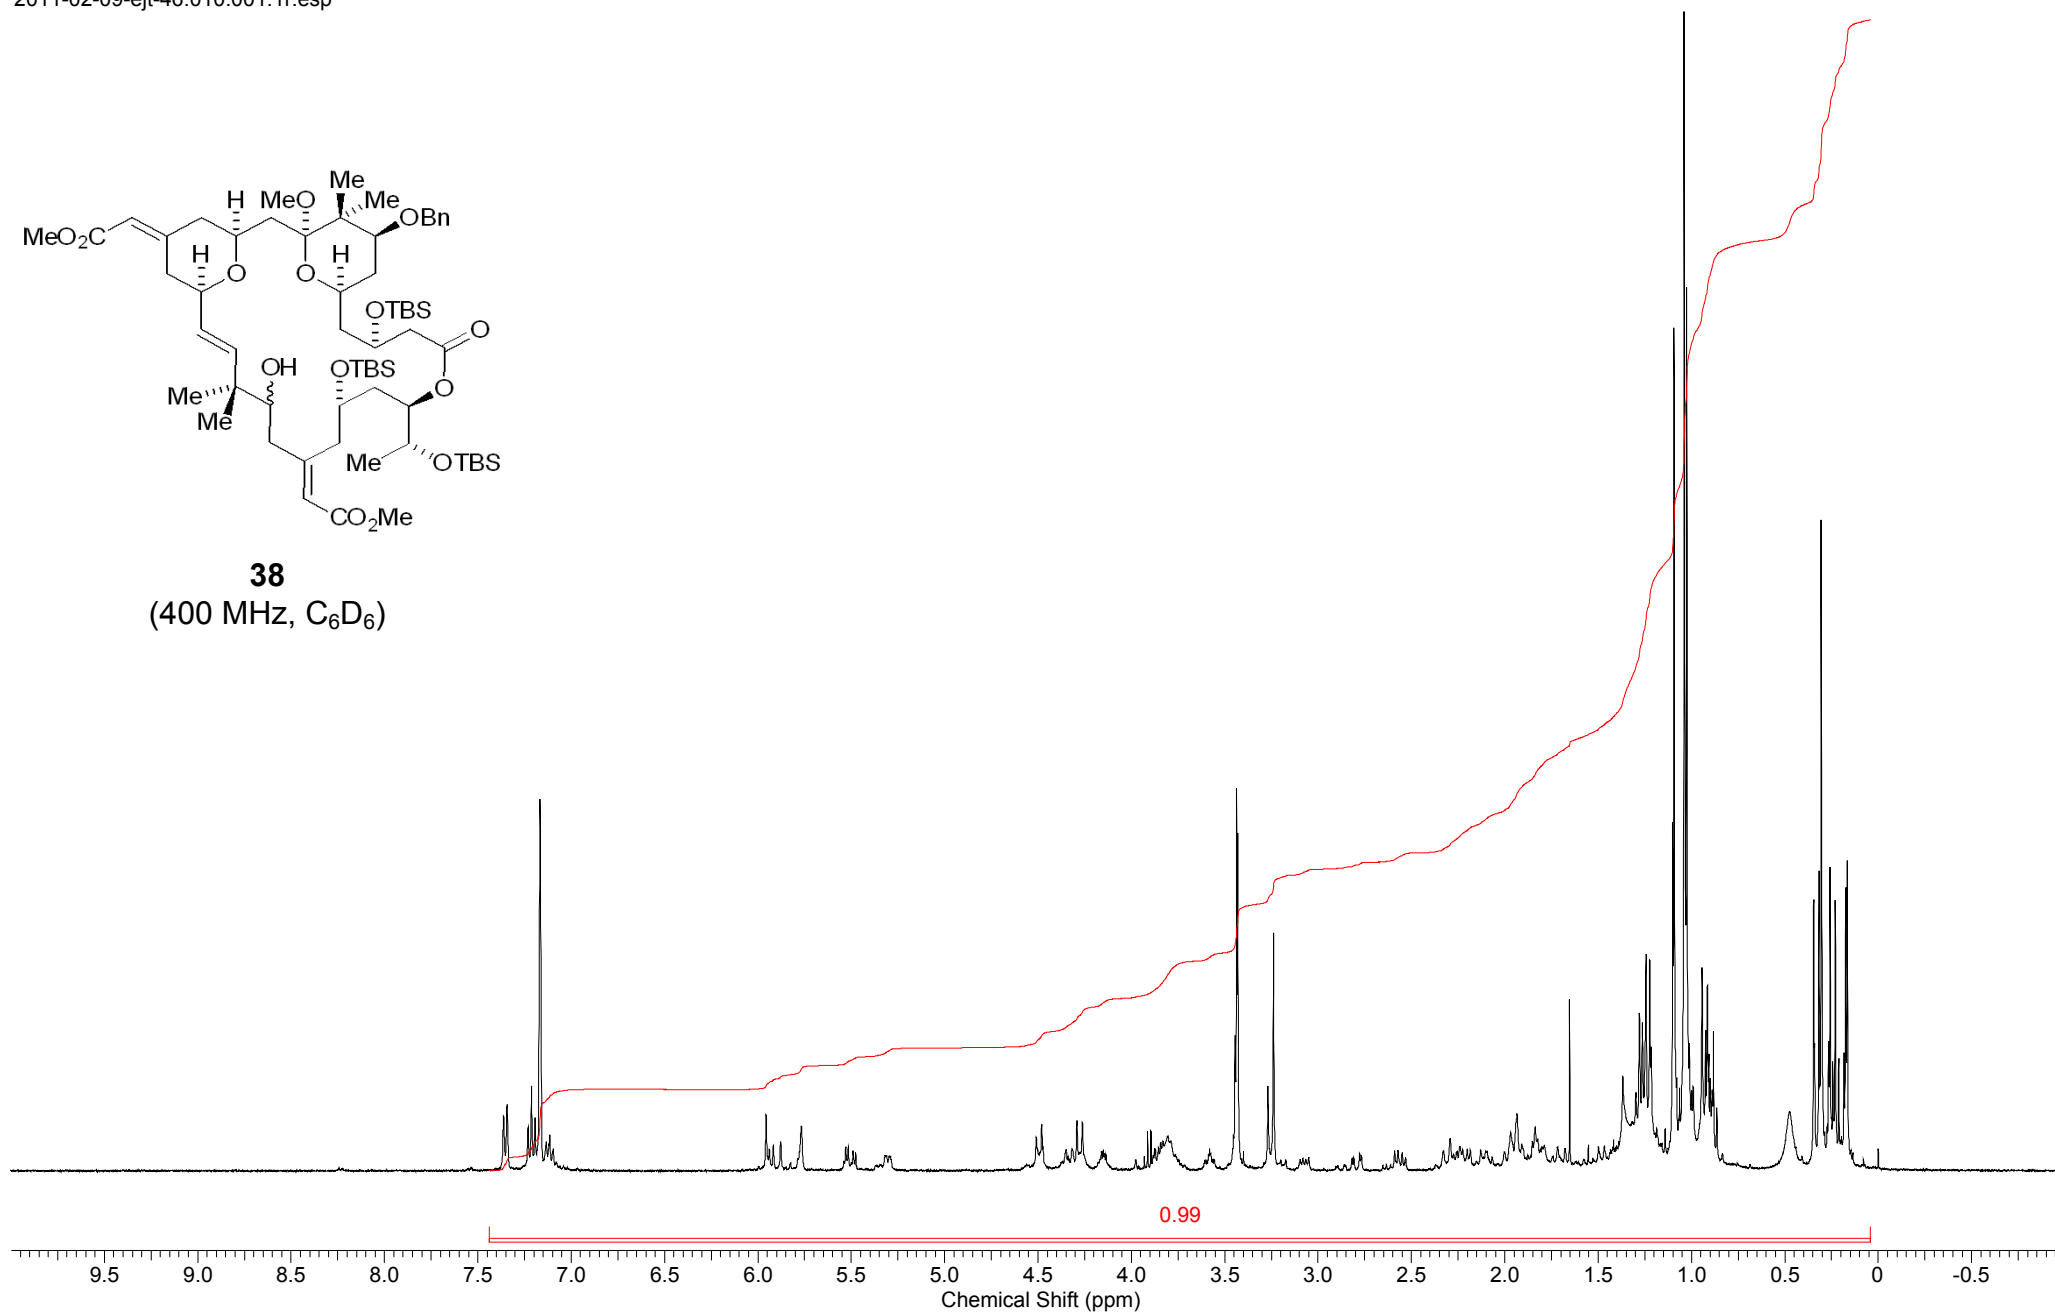

2011-03-01-Administrator-6.011.001.1r.esp

Compound 38 mCARBON C6D6 {E:\bruk400service\_data\2011\Mar} Administrator 6

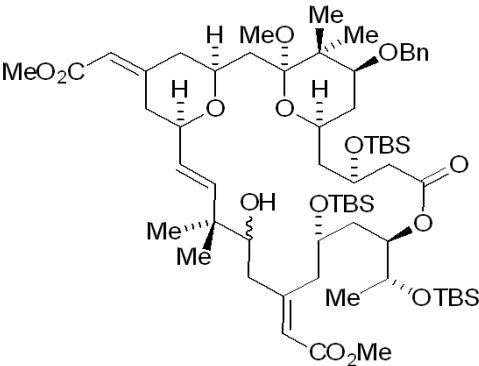

**38**  
(100 MHz, C<sub>6</sub>D<sub>6</sub>)

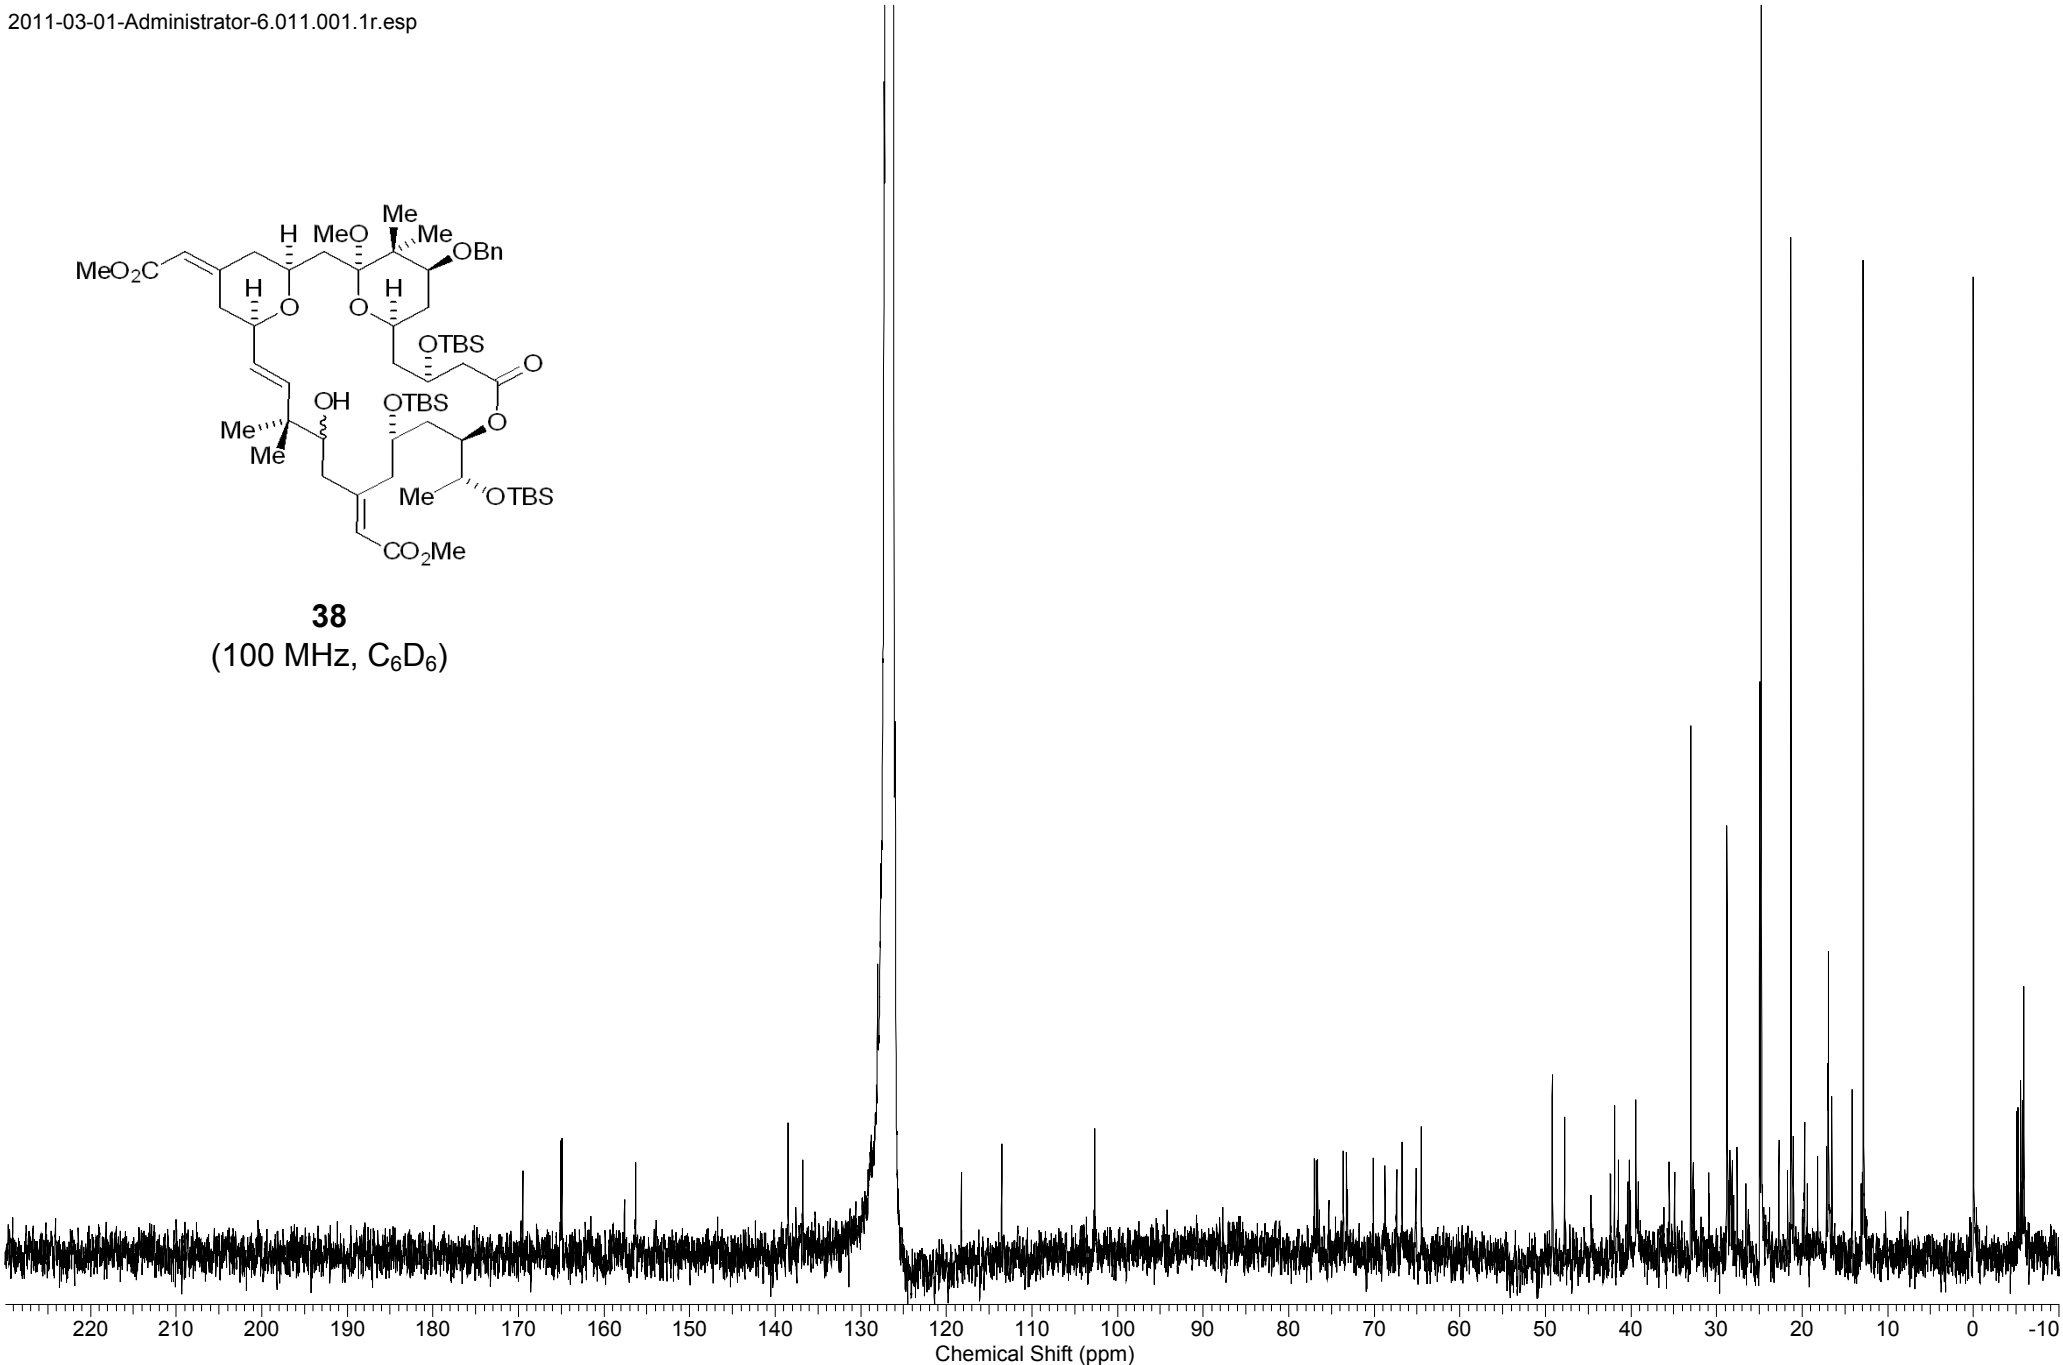

2011-03-09-ejt-12.010.001.1r.esp

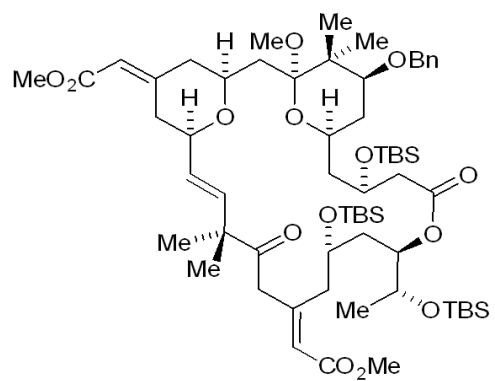

**39**  
(400 MHz, C<sub>6</sub>D<sub>6</sub>)

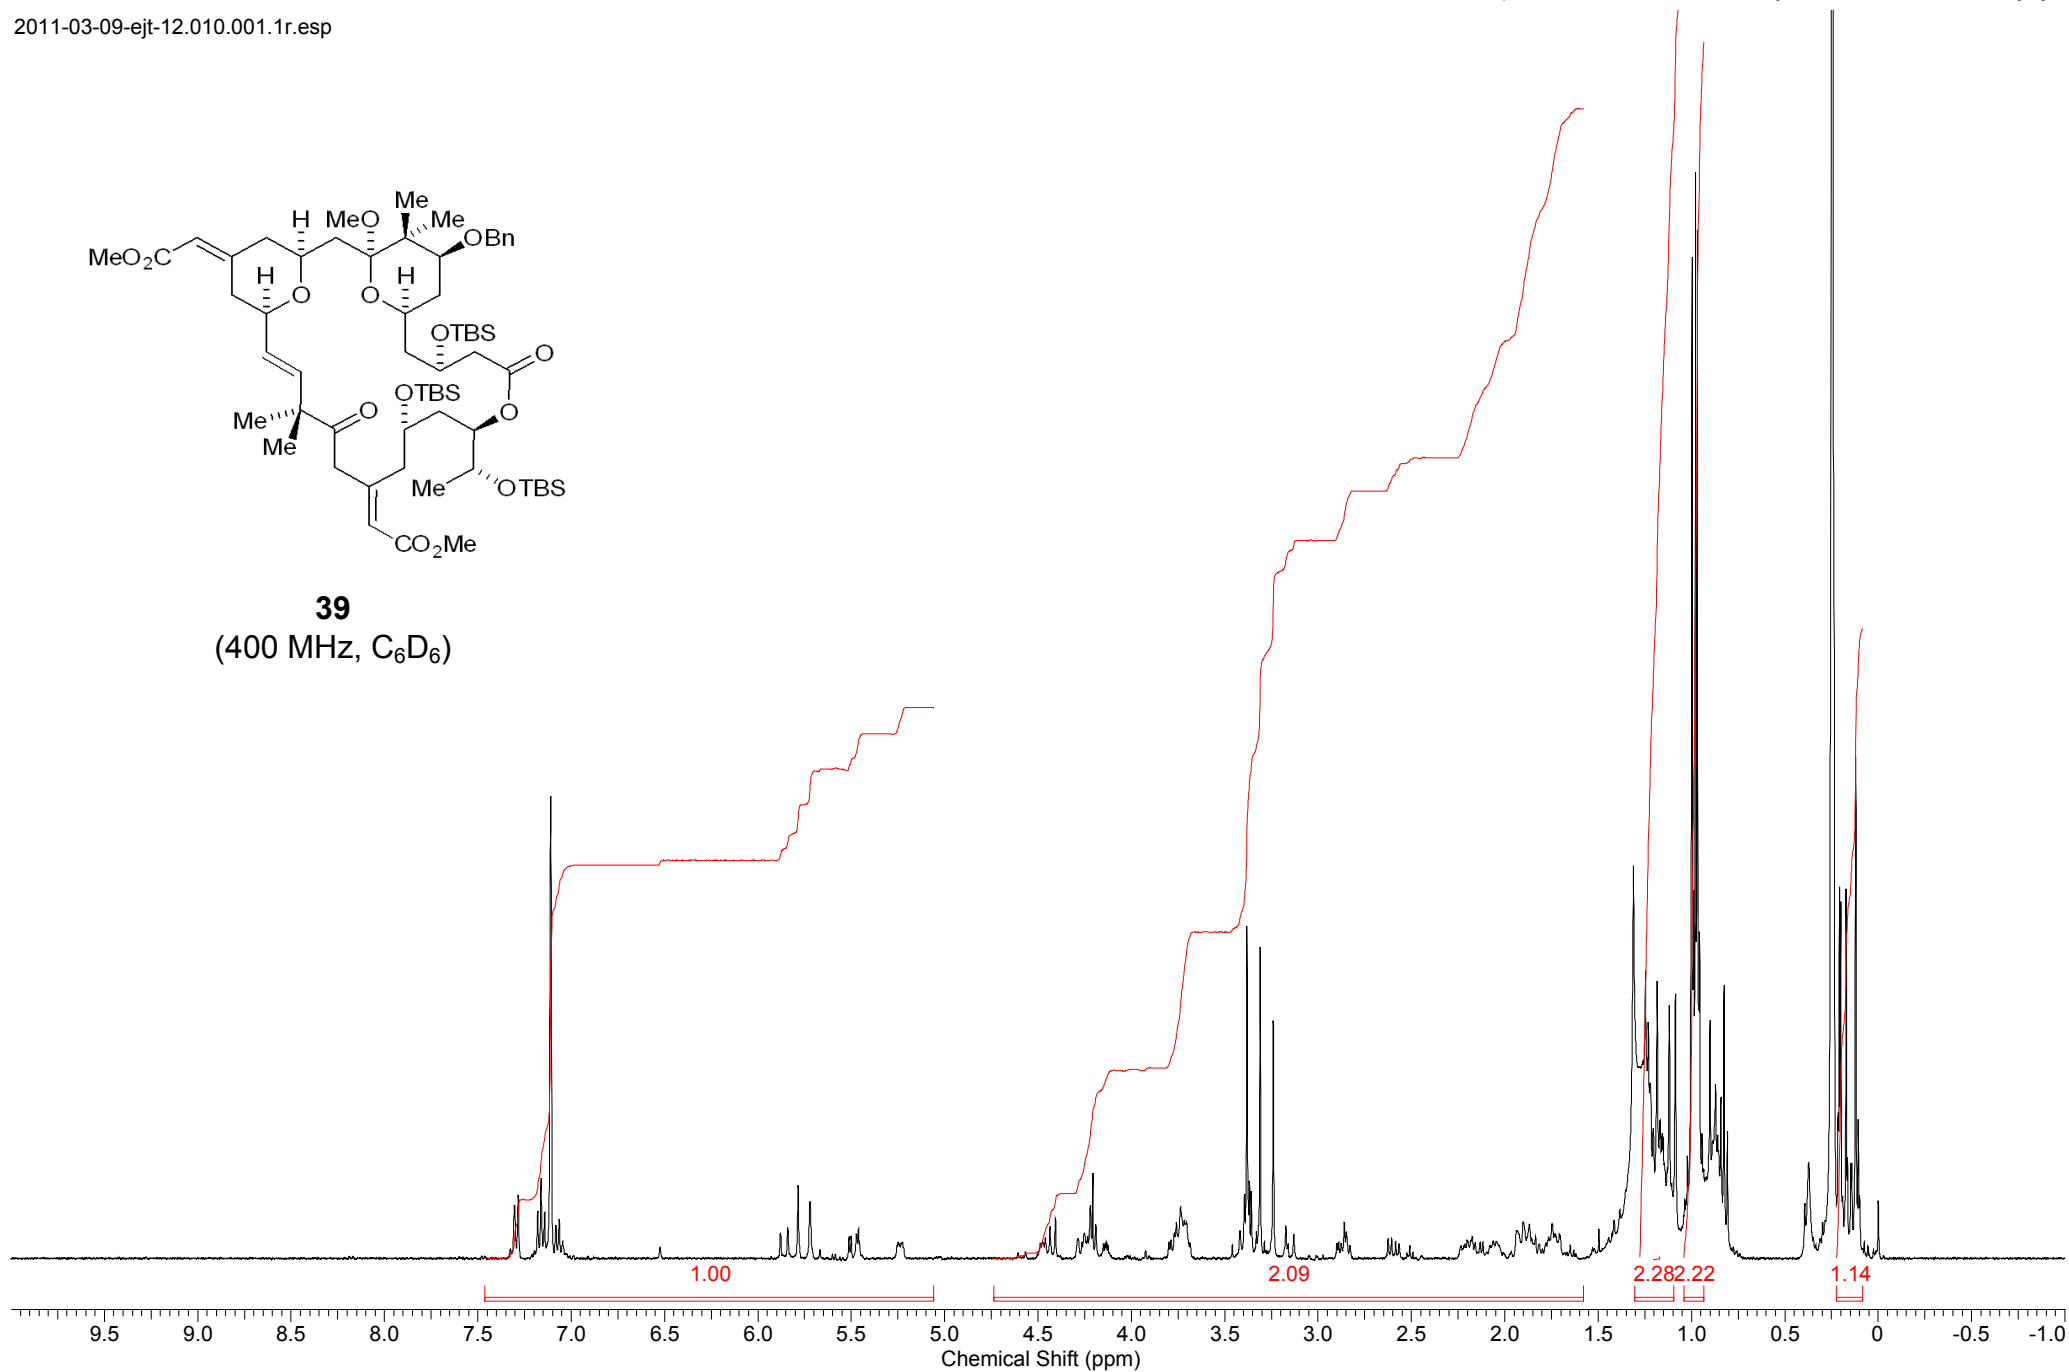

This report was created by ACD/NMR Processor Academic Edition. For more information go to [www.acdlabs.com/nmrproc/](http://www.acdlabs.com/nmrproc/)

Compound 40 mPROTONnight C6D6 /opt/bruk500data/2011/Apr ejt 54

2011-04-12-ejt-54.020.001.1r.esp

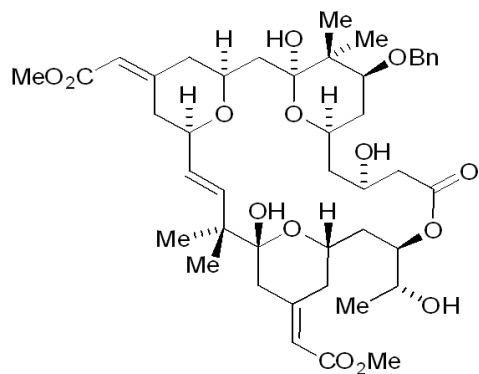

**40**  
(500 MHz, C<sub>6</sub>D<sub>6</sub>)

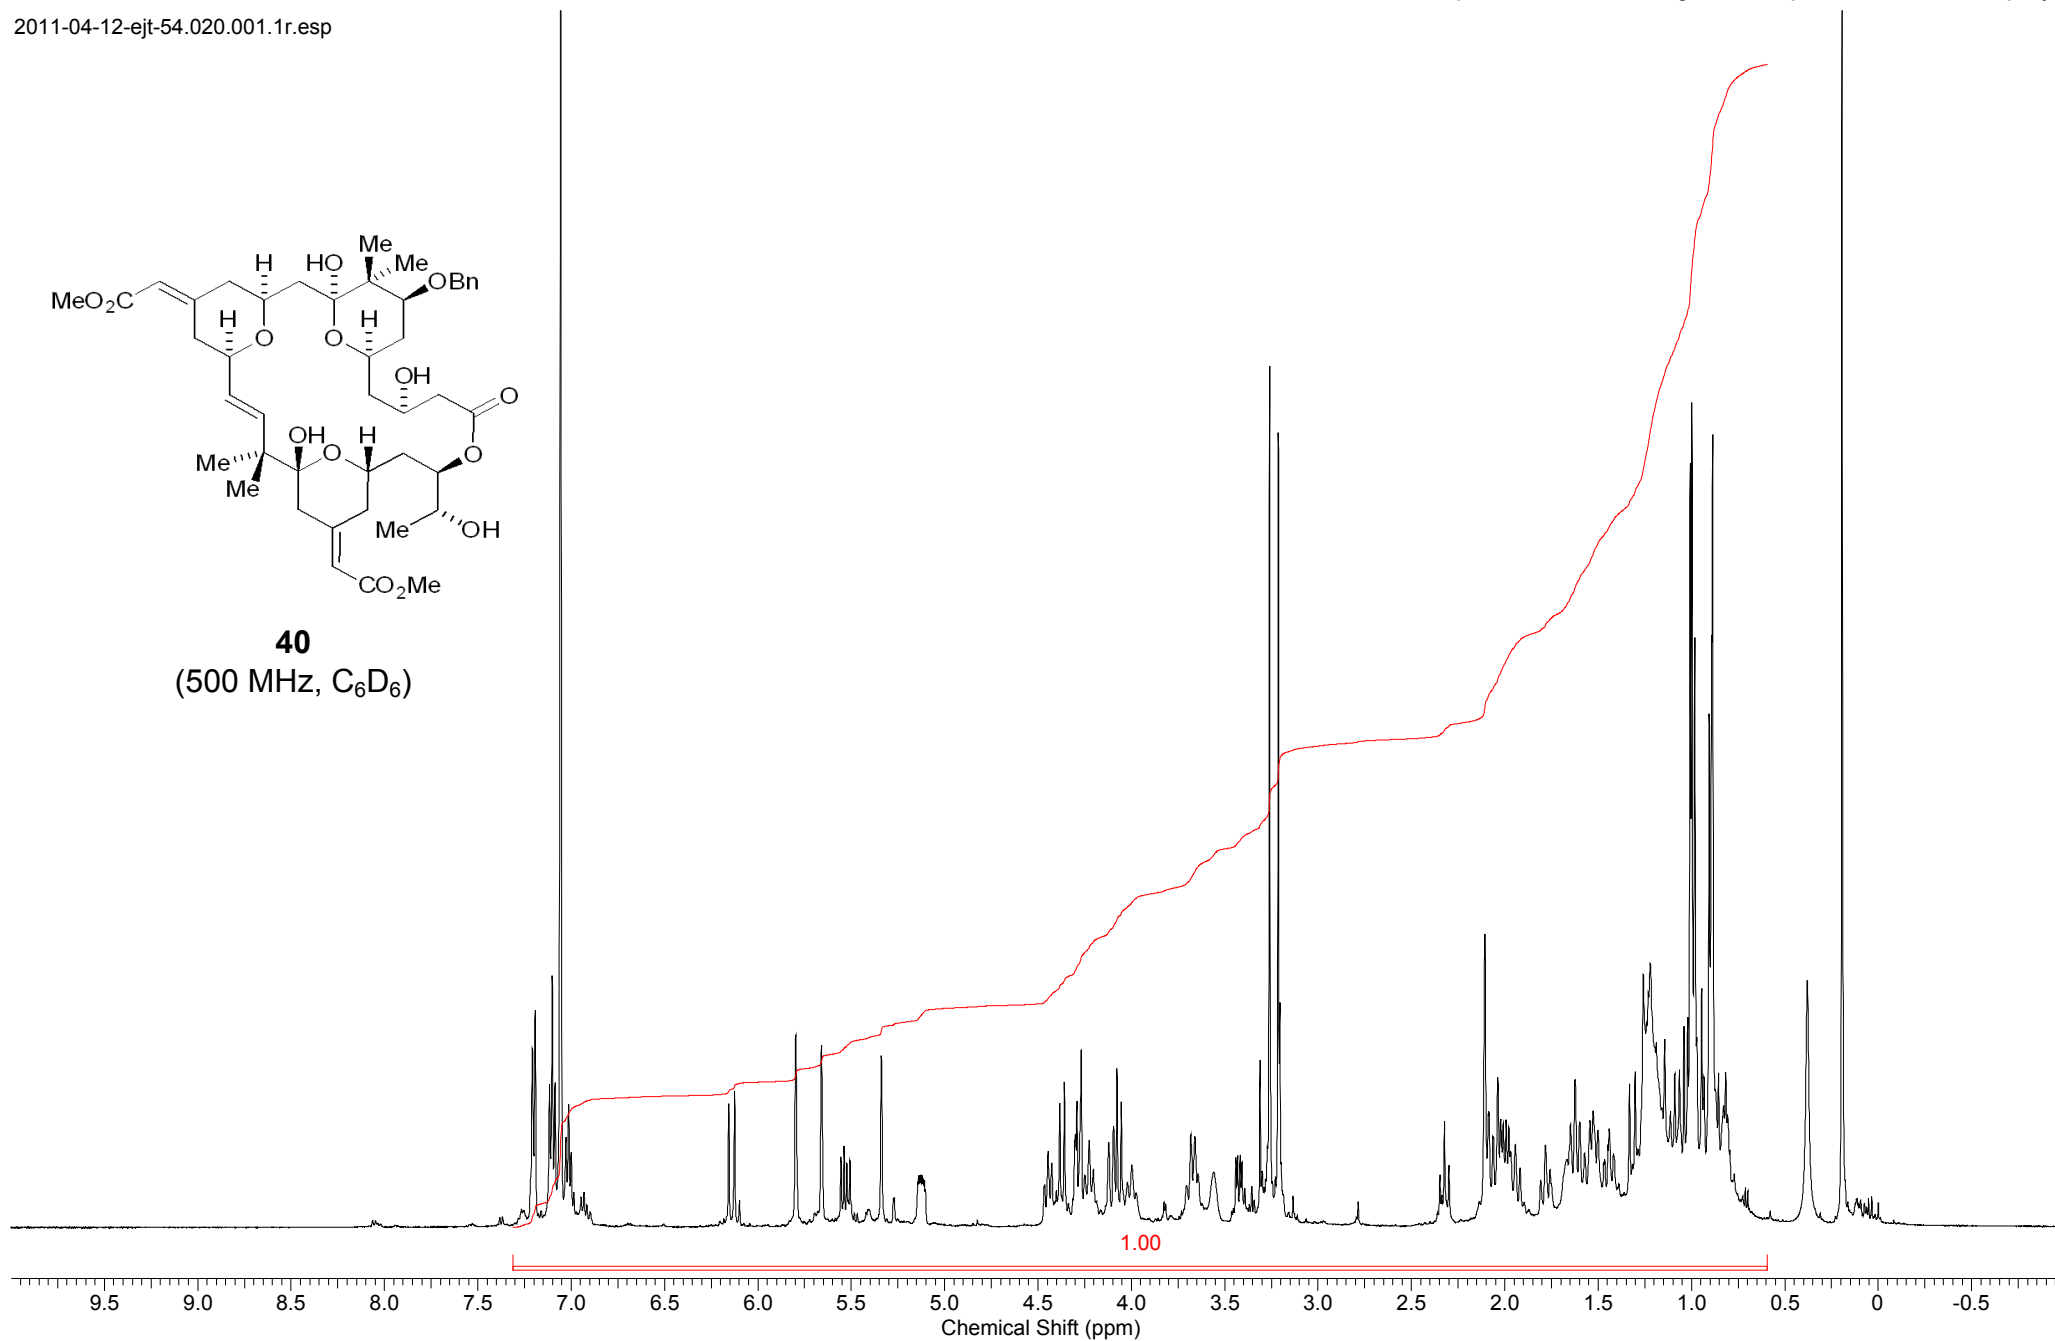

This report was created by ACD/NMR Processor Academic Edition. For more information go to [www.acdlabs.com/nmrproc/](http://www.acdlabs.com/nmrproc/)

Compound 40 mCARBON C6D6{E:\bruk400service\_data\2011\Mar} Administrator 23

2011-03-29-Administrator-61.011.001.1r.esp

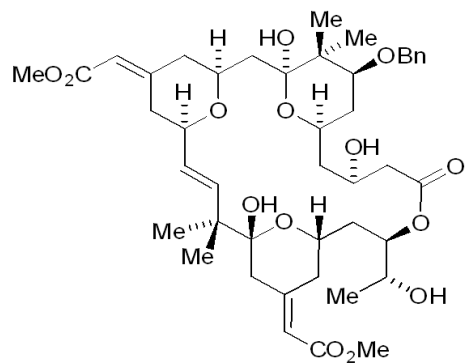

**40**  
(100 MHz, C<sub>6</sub>D<sub>6</sub>)

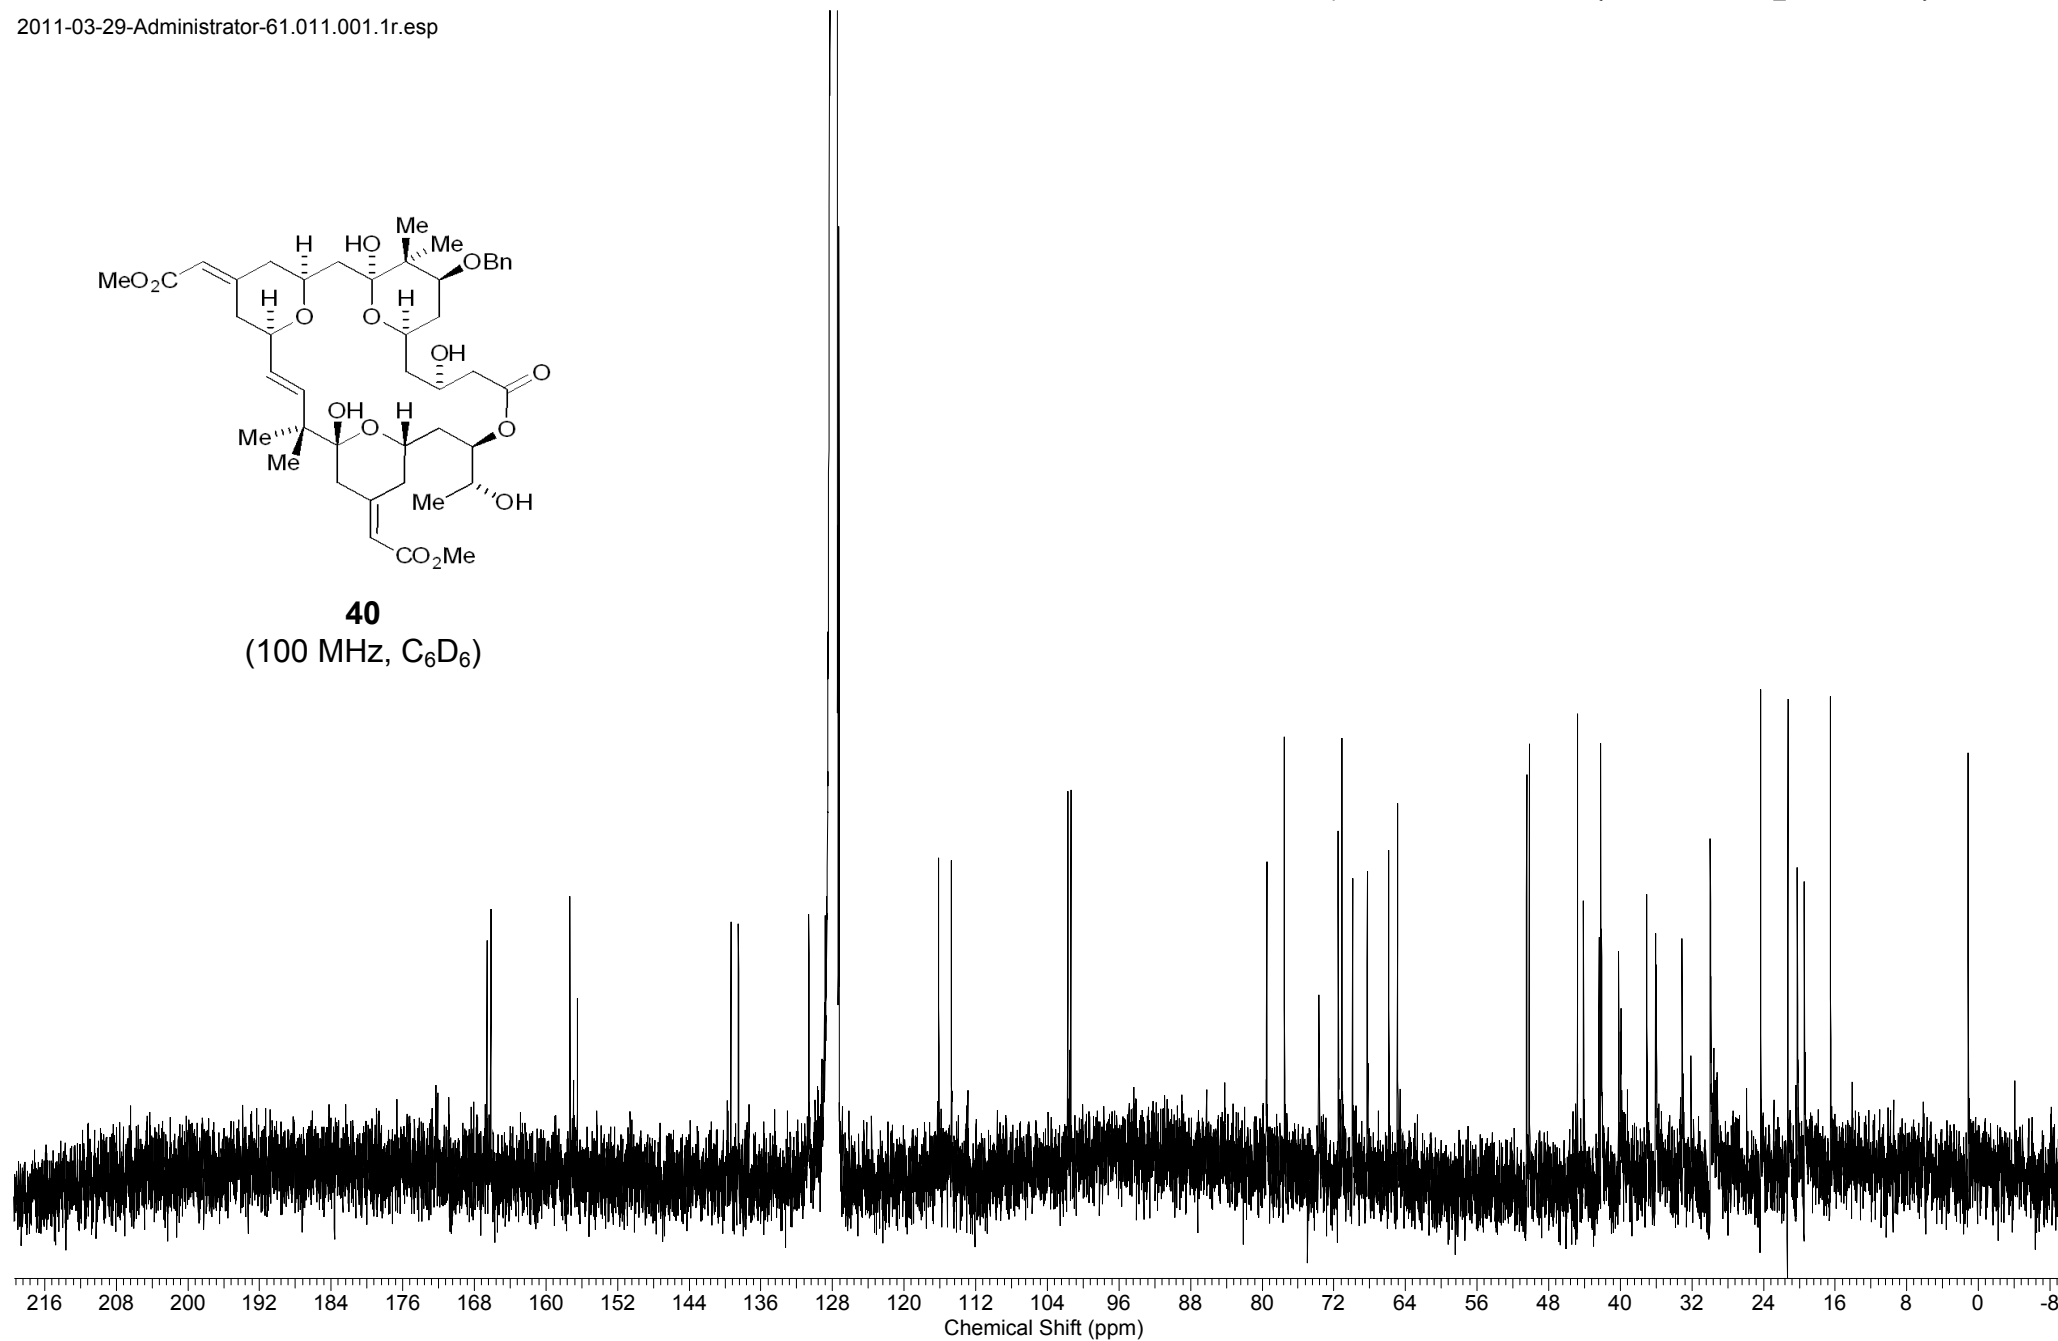

Supplement: c1cc12332g_2.pdf [file c1cc12332g_2.pdf]
